# Supplementary material for: Pre-metabolic syndrome transcriptional response of adipose tissue and liver to obesity in the Ossabaw pig model
Source: Research Square preprint supplement (doi:10.21203/rs.3.rs-8039124/v1), 2025-12-06
Supplement: Supplementary file 1 [file 0d39b6b91543ab6f864df630.xlsx]

## Sheet: Sheet1
PigID	Tissue	Clean bases (Gb)	Clean reads (Million)	Q20(%)	Q30(%)	GC(%)	Dups (%)	Decision
3	SAT	19.8257	99.1285	98.64	95.29	54.91	64.3	use for analysis
11	SAT	18.9574	94.7872	98.35	94.48	57.44	69.15	use for analysis
13	SAT	17.9372	89.6859	98.53	94.78	53.91	61.1	use for analysis
13	VAT	16.4096	82.0482	97.96	92.67	53.46	56.8	use for analysis
13	HEART	17.6022	88.0108	98.93	95.4	45.6	48.5	use for analysis
13	LIVER	16.2504	81.2519	98.98	95.67	46.47	48.55	use for analysis
14	SAT	15.5731	77.8657	99.07	96.22	57.68	91.4	Do not use
14	VAT	20.4367	102.183	98.96	95.8	57.62	90.95	Do not use
15	SAT	11.5817	57.9087	98.69	95.15	54.69	55.6	use for analysis
15	VAT	14.7188	73.5942	98.63	94.77	53.96	53	use for analysis
20	SAT	15.4564	77.2821	97.84	92.45	54.96	57.15	use for analysis
20	VAT	11.7304	58.6521	98	92.44	46.41	32.6	use for analysis
20	LIVER	11.7865	58.9326	97.95	92.21	47.18	46.7	use for analysis
25	VAT	11.0541	55.2706	98.01	92.51	47.05	35	use for analysis
25	HEART	12.282	61.4102	98.03	92.48	45.6	41.95	use for analysis
27	SAT	17.7768	88.8838	98.11	93.39	55.71	65.15	use for analysis
27	LIVER	11.5267	57.6337	97.88	91.95	46.88	46.95	use for analysis
28	SAT	11.3058	56.5292	98.06	92.77	49.16	38.2	use for analysis
28	VAT	11.0388	55.1941	98	92.53	48.72	36.55	use for analysis
28	LIVER	11.5669	57.8344	97.95	92.27	47.43	47.55	use for analysis
29	SAT	16.6754	83.3772	97.99	92.81	54.12	60.25	use for analysis
29	VAT	11.1519	55.7594	97.94	92.25	46.14	33.55	use for analysis
29	LIVER	11.8562	59.2809	97.05	90.79	46.61	39.6	use for analysis
29	HEART	13.1464	65.732	97.15	91.1	44.86	35.9	use for analysis
9	SAT	10.8676	54.3379	97.98	92.53	48.16	35.75	use for analysis
9	VAT	10.1896	50.9482	97.88	92.18	47.64	32.05	use for analysis
9	HEART	13.5549	67.7743	97.83	91.88	45.47	44.65	use for analysis
9	LIVER	12.1395	60.6974	97.87	92.05	46.52	45.5	use for analysis
18	VAT	11.7362	58.6811	97.8	91.84	46.35	32	use for analysis
18	HEART	11.8504	59.2522	97.8	91.77	45.27	43	use for analysis
18	LIVER	9.65424	48.2712	97.67	91.41	46.48	43.75	use for analysis
2	SAT	11.3892	56.9462	98.02	92.7	48.23	35.45	use for analysis
2	HEART	12.262	61.3099	97.75	91.66	44.96	41.9	use for analysis
2	LIVER	12.3991	61.9956	97.67	91.46	47.25	45	use for analysis
3	VAT	10.8845	54.4227	97.91	92.27	46.71	28.75	use for analysis
3	LIVER	9.41299	47.0649	97.44	90.58	46.91	42.6	use for analysis
11	VAT	9.48034	47.4017	97.68	91.38	48.21	33.1	use for analysis
11	HEART	9.95542	49.7771	97.95	92.19	44.31	43.8	use for analysis
11	LIVER	15.8266	79.1332	97.98	92.68	47.65	62.15	use for analysis
