# Supplementary material for: Pre-metabolic syndrome transcriptional response of adipose tissue and liver to obesity in the Ossabaw pig model
Source: Research Square preprint supplement (doi:10.21203/rs.3.rs-8039124/v1), 2025-12-06
Supplement: Supplementary file 2 [file 263e7e8e051030829d3ecfc5.xlsx]

## Sheet: VAT_up_BP
ID	Description	GeneRatio	BgRatio	RichFactor	FoldEnrichment	zScore	pvalue	p.adjust	qvalue	geneID	Count
GO:0006119	oxidative phosphorylation	9/119	60/6214	0.15	7.83277	7.43072	1.66431e-06	0.0015811	0.00156095	UQCC2/COX6C/NDUFV2/NDUFC2/COX7C/NDUFB9/NDUFB6/ATP5MF/UQCRB	9
GO:0045333	cellular respiration	10/119	89/6214	0.11236	5.86725	6.46193	6.45588e-06	0.002922	0.00288476	UQCC2/COX6C/NDUFV2/NDUFC2/COX7C/NDUFB9/NDUFB6/ATP5MF/NDUFA5/UQCRB	10
GO:0022904	respiratory electron transport chain	8/119	58/6214	0.137931	7.20255	6.6309	1.23058e-05	0.002922	0.00288476	COX6C/NDUFV2/NDUFC2/COX7C/NDUFB9/NDUFB6/NDUFA5/UQCRB	8
GO:0019646	aerobic electron transport chain	7/119	43/6214	0.162791	8.50068	6.89596	1.44052e-05	0.002922	0.00288476	COX6C/NDUFV2/NDUFC2/COX7C/NDUFB9/NDUFB6/UQCRB	7
GO:0009060	aerobic respiration	9/119	78/6214	0.115385	6.02521	6.24017	1.53789e-05	0.002922	0.00288476	UQCC2/COX6C/NDUFV2/NDUFC2/COX7C/NDUFB9/NDUFB6/ATP5MF/UQCRB	9
GO:0022900	electron transport chain	8/119	62/6214	0.129032	6.73787	6.34418	2.03639e-05	0.00322428	0.00318319	COX6C/NDUFV2/NDUFC2/COX7C/NDUFB9/NDUFB6/NDUFA5/UQCRB	8
GO:0042775	mitochondrial ATP synthesis coupled electron transport	7/119	47/6214	0.148936	7.77722	6.5163	2.63887e-05	0.00358133	0.00353569	COX6C/NDUFV2/NDUFC2/COX7C/NDUFB9/NDUFB6/UQCRB	7
GO:0042773	ATP synthesis coupled electron transport	7/119	50/6214	0.14	7.31059	6.25981	3.99669e-05	0.00474607	0.00468559	COX6C/NDUFV2/NDUFC2/COX7C/NDUFB9/NDUFB6/UQCRB	7
GO:0015980	energy derivation by oxidation of organic compounds	10/119	124/6214	0.0806452	4.21117	5.04664	0.000117969	0.0124523	0.0122936	UQCC2/COX6C/NDUFV2/NDUFC2/COX7C/NDUFB9/NDUFB6/ATP5MF/NDUFA5/UQCRB	10
GO:0000387	spliceosomal snRNP assembly	4/119	18/6214	0.222222	11.6041	6.29495	0.00031789	0.0274542	0.0271043	SNRPD2/CLNS1A/SNRPE/SNRPF	4
GO:0006120	mitochondrial electron transport, NADH to ubiquinone	4/119	18/6214	0.222222	11.6041	6.29495	0.00031789	0.0274542	0.0271043	NDUFV2/NDUFC2/NDUFB9/NDUFB6	4

## Sheet: VAT_up_CC
ID	Description	GeneRatio	BgRatio	RichFactor	FoldEnrichment	zScore	pvalue	p.adjust	qvalue	geneID	Count
GO:0022626	cytosolic ribosome	9/128	88/6878	0.102273	5.49556	5.84444	3.33936e-05	0.00435584	0.00383408	RPL23/RPS29/RPL34/RPL36AL/RPL22/RPS17/RPL23A/RPS24/RPS19	9
GO:0005840	ribosome	11/128	137/6878	0.080292	4.31444	5.39586	4.3711e-05	0.00435584	0.00383408	RPL23/RPS29/RPS27A/RPL34/RPL36AL/RPL22/RPS17/RPL23A/RPS24/RPS19/CHCHD1	11
GO:0062023	collagen-containing extracellular matrix	8/128	73/6878	0.109589	5.8887	5.7822	5.63255e-05	0.00435584	0.00383408	MGP/ECM2/LOX/MFAP5/PCOLCE2/FCN2/NTN4/FBLN5	8
GO:0098556	cytoplasmic side of rough endoplasmic reticulum membrane	5/128	26/6878	0.192308	10.3335	6.56563	9.92047e-05	0.00575387	0.00506466	RPL23/RPS29/RPL36AL/RPL22/RPS17	5
GO:1990904	ribonucleoprotein complex	18/128	365/6878	0.0493151	2.64991	4.46036	0.000128475	0.00587164	0.00516832	RPL23/RPS29/RPS27A/RPL34/RPL36AL/RPL22/RPS17/RPL23A/SNRPD2/RPS24/EIF3H/RPS19/CLNS1A/RNF113A/LSM8/PPIL2/SNRPE/SNRPF	18
GO:0030312	external encapsulating structure	10/128	135/6878	0.0740741	3.98032	4.81567	0.000192842	0.00587164	0.00516832	MGP/ECM2/ASPN/LOX/DPT/MFAP5/PCOLCE2/FCN2/NTN4/FBLN5	10
GO:0031012	extracellular matrix	10/128	135/6878	0.0740741	3.98032	4.81567	0.000192842	0.00587164	0.00516832	MGP/ECM2/ASPN/LOX/DPT/MFAP5/PCOLCE2/FCN2/NTN4/FBLN5	10
GO:0098554	cytoplasmic side of endoplasmic reticulum membrane	5/128	30/6878	0.166667	8.95573	6.01328	0.00020247	0.00587164	0.00516832	RPL23/RPS29/RPL36AL/RPL22/RPS17	5
GO:0044391	ribosomal subunit	9/128	114/6878	0.0789474	4.24219	4.80664	0.000252259	0.00650267	0.00572377	RPL23/RPS29/RPL34/RPL36AL/RPL22/RPS17/RPL23A/RPS24/RPS19	9
GO:0030867	rough endoplasmic reticulum membrane	5/128	36/6878	0.138889	7.46311	5.3537	0.000489851	0.0113646	0.0100033	RPL23/RPS29/RPL36AL/RPL22/RPS17	5
GO:0046540	U4/U6 x U5 tri-snRNP complex	4/128	24/6878	0.166667	8.95573	5.37609	0.000911047	0.0192148	0.0169132	SNRPD2/LSM8/SNRPE/SNRPF	4
GO:0097526	spliceosomal tri-snRNP complex	4/128	25/6878	0.16	8.5975	5.24026	0.00106909	0.020669	0.0181933	SNRPD2/LSM8/SNRPE/SNRPF	4
GO:0005791	rough endoplasmic reticulum	5/128	44/6878	0.113636	6.10618	4.67883	0.00125305	0.0223622	0.0196836	RPL23/RPS29/RPL36AL/RPL22/RPS17	5
GO:0005685	U1 snRNP	3/128	14/6878	0.214286	11.5145	5.42272	0.00197227	0.0326833	0.0287684	SNRPD2/SNRPE/SNRPF	3
GO:0022625	cytosolic large ribosomal subunit	5/128	50/6878	0.1	5.37344	4.2738	0.00223678	0.0345955	0.0304515	RPL23/RPL34/RPL36AL/RPL22/RPL23A	5
GO:0022627	cytosolic small ribosomal subunit	4/128	33/6878	0.121212	6.51326	4.37151	0.00308318	0.0429469	0.0378026	RPS29/RPS17/RPS24/RPS19	4
GO:0120114	Sm-like protein family complex	5/128	54/6878	0.0925926	4.97541	4.03842	0.00314697	0.0429469	0.0378026	SNRPD2/CLNS1A/LSM8/SNRPE/SNRPF	5

## Sheet: VAT_up_MF
ID	Description	GeneRatio	BgRatio	RichFactor	FoldEnrichment	zScore	pvalue	p.adjust	qvalue	geneID	Count
GO:0003735	structural constituent of ribosome	1999-10-01	110/5977	0.0909091	5.48852	6.16595	1.16984e-05	0.00284271	0.0027091	RPL23/RPS29/RPS27A/RPL34/RPL36AL/RPL22/RPS17/RPL23A/RPS24/RPS19	10
GO:0005198	structural molecule activity	1999-12-01	211/5977	0.056872	3.43358	4.67043	0.000168722	0.0204997	0.0195362	RPL23/RPS29/RPS27A/RPL34/RPL36AL/RPL22/RPS17/MYL6/RPL23A/RPS24/RPS19/LOC100738720	12
GO:0031386	protein tag activity	1999-03-01	5977-10-01	0.3	18.1121	7.02804	0.000486179	0.0295354	0.0281472	RPS27A/SUMO2/NEDD8	3
GO:0141047	molecular tag activity	1999-03-01	5977-10-01	0.3	18.1121	7.02804	0.000486179	0.0295354	0.0281472	RPS27A/SUMO2/NEDD8	3

## Sheet: VAT_up_kegg
category	subcategory	ID	Description	GeneRatio	BgRatio	RichFactor	FoldEnrichment	zScore	pvalue	p.adjust	qvalue	geneID	Count
Metabolism	Energy metabolism	ssc00190	Oxidative phosphorylation	15/107	117/5918	0.128205	7.09082	9.0289	1.83269e-09	3.24386e-07	3.10592e-07	COX6C/ATP5PF/NDUFB1/NDUFV2/NDUFC2/COX7C/COX17/NDUFB9/NDUFS4/NDUFB6/ATP5MF/NDUFA5/UQCRB/ATP5PD/NDUFA3	15
Organismal Systems	Environmental adaptation	ssc04714	Thermogenesis	17/107	205/5918	0.0829268	4.58655	7.09152	1.13578e-07	1.00516e-05	9.62423e-06	COX6C/ATP5PF/NDUFB1/NDUFV2/NDUFC2/COX7C/COX17/NDUFB9/COX20/NDUFS4/SLC25A20/NDUFB6/ATP5MF/NDUFA5/UQCRB/ATP5PD/NDUFA3	17
Genetic Information Processing	Translation	ssc03010	Ribosome	14/107	154/5918	0.0909091	5.02804	6.87241	5.44661e-07	3.2135e-05	3.07686e-05	RPL23/RPS15A/RPS29/RPS27A/RPL34/RPL36AL/RPL17/RPL22/RPS17/RPL36A/RPL23A/RPL37/RPS24/RPS19	14
Human Diseases	Cardiovascular disease	ssc05415	Diabetic cardiomyopathy	15/107	185/5918	0.0810811	4.48447	6.53354	9.14899e-07	4.04843e-05	3.87628e-05	COX6C/ATP5PF/NDUFB1/NDUFV2/NDUFC2/COX7C/NDUFB9/NDUFS4/NDUFB6/NDUFA5/UQCRB/ATP5PD/GSR/NDUFA3/SLC25A6	15
Human Diseases	Neurodegenerative disease	ssc05012	Parkinson disease	16/107	225/5918	0.0711111	3.93304	6.08634	2.22723e-06	7.88441e-05	7.54915e-05	RPS27A/COX6C/ATP5PF/NDUFB1/GNAI3/NDUFV2/NDUFC2/COX7C/NDUFB9/NDUFS4/NDUFB6/NDUFA5/UQCRB/ATP5PD/NDUFA3/SLC25A6	16
Human Diseases	Neurodegenerative disease	ssc05016	Huntington disease	17/107	256/5918	0.0664062	3.67282	5.93229	2.67372e-06	7.88748e-05	7.55209e-05	COX6C/ATP5PF/NDUFB1/POLR2I/NDUFV2/NDUFC2/COX7C/NDUFB9/NDUFS4/NDUFB6/NDUFA5/UQCRB/ATP5PD/POLR2L/WIPI1/NDUFA3/SLC25A6	17
Human Diseases	Infectious disease: viral	ssc05171	Coronavirus disease - COVID-19	14/107	186/5918	0.0752688	4.163	5.9473	5.27517e-06	0.000133386	0.000127715	RPL23/RPS15A/RPS29/RPS27A/RPL34/RPL36AL/RPL17/RPL22/RPS17/RPL36A/RPL23A/RPL37/RPS24/RPS19	14
Human Diseases	Cancer: overview	ssc05208	Chemical carcinogenesis - reactive oxygen species	14/107	194/5918	0.0721649	3.99133	5.74821	8.61591e-06	0.000190627	0.000182521	COX6C/ATP5PF/NDUFB1/NDUFV2/NDUFC2/COX7C/NDUFB9/NDUFS4/NDUFB6/NDUFA5/UQCRB/ATP5PD/NDUFA3/SLC25A6	14
Human Diseases	Endocrine and metabolic disease	ssc04932	Non-alcoholic fatty liver disease	11/107	142/5918	0.0774648	4.28445	5.3754	4.4447e-05	0.000874124	0.000836955	COX6C/NDUFB1/NDUFV2/NDUFC2/COX7C/NDUFB9/NDUFS4/NDUFB6/NDUFA5/UQCRB/NDUFA3	11
Human Diseases	Neurodegenerative disease	ssc05020	Prion disease	14/107	228/5918	0.0614035	3.39613	5.00656	5.33182e-05	0.000943731	0.000903602	COX6C/ATP5PF/NDUFB1/NDUFV2/NDUFC2/COX7C/NDUFB9/NDUFS4/NDUFB6/NDUFA5/UQCRB/ATP5PD/NDUFA3/SLC25A6	14
Organismal Systems	Nervous system	ssc04723	Retrograde endocannabinoid signaling	9/107	113/5918	0.079646	4.40509	4.95889	0.000183923	0.00295949	0.00283365	NDUFB1/GNAI3/NDUFV2/NDUFC2/NDUFB9/NDUFS4/NDUFB6/NDUFA5/NDUFA3	9
Human Diseases	Neurodegenerative disease	ssc05010	Alzheimer disease	15/107	317/5918	0.0473186	2.61712	4.01565	0.000519769	0.0076666	0.0073406	COX6C/ATP5PF/NDUFB1/NDUFV2/NDUFC2/COX7C/NDUFB9/NDUFS4/NDUFB6/NDUFA5/UQCRB/ATP5PD/WIPI1/NDUFA3/SLC25A6	15
Human Diseases	Neurodegenerative disease	ssc05014	Amyotrophic lateral sclerosis	14/107	304/5918	0.0460526	2.5471	3.75782	0.00105493	0.0143633	0.0137526	COX6C/ATP5PF/NDUFB1/NDUFV2/NDUFC2/COX7C/NDUFB9/NDUFS4/NDUFB6/NDUFA5/UQCRB/ATP5PD/WIPI1/NDUFA3	14
Human Diseases	Neurodegenerative disease	ssc05022	Pathways of neurodegeneration - multiple diseases	16/107	386/5918	0.0414508	2.29258	3.5639	0.00140858	0.0178084	0.0170512	RPS27A/COX6C/ATP5PF/NDUFB1/NDUFV2/NDUFC2/COX7C/NDUFB9/NDUFS4/NDUFB6/NDUFA5/UQCRB/ATP5PD/WIPI1/NDUFA3/SLC25A6	16

## Sheet: VAT_down_cc
ID	Description	GeneRatio	BgRatio	RichFactor	FoldEnrichment	zScore	pvalue	p.adjust	qvalue	geneID	Count
GO:0005834	heterotrimeric G-protein complex	4/101	16/6878	0.25	17.0248	7.83371	6.96201e-05	0.0135063	0.0122385	GNAI2/GNB3/GNAT1/GNA14	4
GO:1905360	GTPase complex	4/101	19/6878	0.210526	14.3366	7.10615	0.000143326	0.0139026	0.0125976	GNAI2/GNB3/GNAT1/GNA14	4
GO:0098797	plasma membrane protein complex	10/101	184/6878	0.0543478	3.70103	4.53354	0.000342536	0.0165177	0.0149672	GNAI2/ITGAL/GABBR1/GNB3/CDH23/GRIN3B/GNAT1/ITGB2/GNA14/GP91-PHOX	10
GO:0036477	somatodendritic compartment	9/101	155/6878	0.0580645	3.95414	4.54105	0.000423157	0.0165177	0.0149672	GNAI2/STRN4/SHANK1/MAPK8IP3/GNB3/GRIN3B/HRH2/PTK7/C4A	9
GO:0019897	extrinsic component of plasma membrane	5/101	44/6878	0.113636	7.73852	5.47388	0.00042624	0.0165177	0.0149672	GNAI2/GNB3/CDH23/GNAT1/GNA14	5
GO:0031234	extrinsic component of cytoplasmic side of plasma membrane	4/101	26/6878	0.153846	10.4768	5.9099	0.000510856	0.0165177	0.0149672	GNAI2/GNB3/GNAT1/GNA14	4

## Sheet: VAT_down_kegg
category	subcategory	ID	Description	GeneRatio	BgRatio	RichFactor	FoldEnrichment	zScore	pvalue	p.adjust	qvalue	geneID	Count
Organismal Systems	Nervous system	ssc04724	Glutamatergic synapse	9/138	79/5918	0.113924	4.88553	5.37181	8.08907e-05	0.0190093	0.0177108	GRK2/GNAI2/SHANK3/DLG4/SHANK1/MAPK3/GNB3/GRIN3B/GNG8	9

## Sheet: liver_up_BP
ID	Description	GeneRatio	BgRatio	RichFactor	FoldEnrichment	pvalue	p.adjust	qvalue	geneID	Count
GO:0001558	regulation of cell growth	4/13	88/5905	0.0454545	20.6469	2.97223e-05	0.0121179	0.00881937	MFSD2A/CCN3/SOX17/EPHA7	4
GO:0016049	cell growth	4/13	99/5905	0.040404	18.3528	4.73356e-05	0.0121179	0.00881937	MFSD2A/CCN3/SOX17/EPHA7	4
GO:0040008	regulation of growth	4/13	127/5905	0.0314961	14.3065	0.000125545	0.0174324	0.0126872	MFSD2A/CCN3/SOX17/EPHA7	4
GO:0030308	negative regulation of cell growth	3/13	48/5905	0.0625	28.3894	0.00013619	0.0174324	0.0126872	CCN3/SOX17/EPHA7	3
GO:0045926	negative regulation of growth	3/13	56/5905	0.0535714	24.3338	0.000216055	0.0178006	0.0129552	CCN3/SOX17/EPHA7	3
GO:0071825	protein-lipid complex organization	2/13	11/5905	0.181818	82.5874	0.000243368	0.0178006	0.0129552	MFSD2A/LIPG	2
GO:0071827	plasma lipoprotein particle organization	2/13	11/5905	0.181818	82.5874	0.000243368	0.0178006	0.0129552	MFSD2A/LIPG	2
GO:0040007	growth	4/13	177/5905	0.0225989	10.2651	0.000451341	0.0288858	0.021023	MFSD2A/CCN3/SOX17/EPHA7	4
GO:0097006	regulation of plasma lipoprotein particle levels	2/13	19/5905	0.105263	47.8138	0.000749168	0.0426193	0.0310182	MFSD2A/LIPG	2

## Sheet: liver_up_MF
ID	Description	GeneRatio	BgRatio	RichFactor	FoldEnrichment	pvalue	p.adjust	qvalue	geneID	Count
GO:0005539	glycosaminoglycan binding	3/13	58/5699	0.0517241	22.6751	0.000266179	0.0226252	0.0184924	CCN3/LIPG/LYVE1	3

## Sheet: liver_up_kegg
category	subcategory	ID	Description	GeneRatio	BgRatio	RichFactor	FoldEnrichment	pvalue	p.adjust	qvalue	geneID	Count
NA	NA	ssc04081	Hormone signaling	3/13	100/5600	0.03	12.9231	0.00138761	0.024977	0.0189884	DIO1/GHR/DIO2	3
Organismal Systems	Digestive system	ssc04979	Cholesterol metabolism	2/13	47/5600	0.0425532	18.3306	0.00507051	0.0456346	0.0346929	PCSK9/LIPG	2

## Sheet: liver_down_BP
ID	Description	GeneRatio	BgRatio	RichFactor	FoldEnrichment	pvalue	p.adjust	qvalue	geneID	Count
GO:0019752	carboxylic acid metabolic process	4/4	318/5905	0.0125786	18.5692	8.26125e-06	0.000122924	1.02153e-05	ARG1/GLUD1/SCD/FASN	4
GO:0043436	oxoacid metabolic process	4/4	323/5905	0.0123839	18.2817	8.7958e-06	0.000122924	1.02153e-05	ARG1/GLUD1/SCD/FASN	4
GO:0006082	organic acid metabolic process	4/4	331/5905	0.0120846	17.8399	9.70451e-06	0.000122924	1.02153e-05	ARG1/GLUD1/SCD/FASN	4
GO:0170040	proteinogenic amino acid catabolic process	2/4	30/5905	0.0666667	98.4167	0.000148783	0.00107394	8.92474e-05	ARG1/GLUD1	2
GO:0170035	L-amino acid catabolic process	2/4	31/5905	0.0645161	95.2419	0.000159008	0.00107394	8.92474e-05	ARG1/GLUD1	2
GO:0009064	glutamine family amino acid metabolic process	2/4	32/5905	0.0625	92.2656	0.00016957	0.00107394	8.92474e-05	ARG1/GLUD1	2
GO:1901606	alpha-amino acid catabolic process	2/4	38/5905	0.0526316	77.6974	0.000240012	0.00130292	0.000108276	ARG1/GLUD1	2
GO:0009063	amino acid catabolic process	2/4	44/5905	0.0454545	67.1023	0.000322535	0.00148926	0.000123761	ARG1/GLUD1	2
GO:0006633	fatty acid biosynthetic process	2/4	46/5905	0.0434783	64.1848	0.000352719	0.00148926	0.000123761	SCD/FASN	2
GO:0072330	monocarboxylic acid biosynthetic process	2/4	62/5905	0.0322581	47.621	0.0006421	0.00243998	0.000202769	SCD/FASN	2
GO:0170039	proteinogenic amino acid metabolic process	2/4	67/5905	0.0298507	44.0672	0.000749906	0.00251855	0.000209298	ARG1/GLUD1	2
GO:0170033	L-amino acid metabolic process	2/4	69/5905	0.0289855	42.7899	0.000795332	0.00251855	0.000209298	ARG1/GLUD1	2
GO:1901605	alpha-amino acid metabolic process	2/4	84/5905	0.0238095	35.1488	0.00117778	0.00344275	0.000286101	ARG1/GLUD1	2
GO:0016054	organic acid catabolic process	2/4	105/5905	0.0190476	28.119	0.00183591	0.00444312	0.000369235	ARG1/GLUD1	2
GO:0046395	carboxylic acid catabolic process	2/4	105/5905	0.0190476	28.119	0.00183591	0.00444312	0.000369235	ARG1/GLUD1	2
GO:0046394	carboxylic acid biosynthetic process	2/4	106/5905	0.0188679	27.8538	0.00187079	0.00444312	0.000369235	SCD/FASN	2
GO:0016053	organic acid biosynthetic process	2/4	110/5905	0.0181818	26.8409	0.0020135	0.00450077	0.000374025	SCD/FASN	2
GO:0006520	amino acid metabolic process	2/4	118/5905	0.0169492	25.0212	0.00231423	0.00488561	0.000406006	ARG1/GLUD1	2
GO:0044282	small molecule catabolic process	2/4	138/5905	0.0144928	21.3949	0.00315466	0.00616667	0.000512465	ARG1/GLUD1	2
GO:0006631	fatty acid metabolic process	2/4	140/5905	0.0142857	21.0893	0.00324561	0.00616667	0.000512465	SCD/FASN	2
GO:0032787	monocarboxylic acid metabolic process	2/4	208/5905	0.00961538	14.1947	0.00706971	0.011768	0.000977947	SCD/FASN	2
GO:0044283	small molecule biosynthetic process	2/4	210/5905	0.00952381	14.0595	0.00720333	0.011768	0.000977947	SCD/FASN	2
GO:0006525	arginine metabolic process	1/4	11/5905	0.0909091	134.205	0.0074324	0.011768	0.000977947	ARG1	1
GO:0072350	tricarboxylic acid metabolic process	1/4	11/5905	0.0909091	134.205	0.0074324	0.011768	0.000977947	GLUD1	1
GO:0006536	glutamate metabolic process	1/4	12/5905	0.0833333	123.021	0.00810601	0.0123211	0.00102392	GLUD1	1
GO:0008610	lipid biosynthetic process	2/4	240/5905	0.00833333	12.3021	0.00934906	0.013664	0.00113551	SCD/FASN	2
GO:0006541	glutamine metabolic process	1/4	15/5905	0.0666667	98.4167	0.0101248	0.0142497	0.00118419	GLUD1	1
GO:0006636	unsaturated fatty acid biosynthetic process	1/4	17/5905	0.0588235	86.8382	0.0114689	0.015565	0.00129349	SCD	1
GO:0170041	non-proteinogenic amino acid metabolic process	1/4	24/5905	0.0416667	61.5104	0.0161626	0.0211786	0.00176	ARG1	1
GO:0043648	dicarboxylic acid metabolic process	1/4	28/5905	0.0357143	52.7232	0.0188372	0.0238605	0.00198287	GLUD1	1
GO:0044255	cellular lipid metabolic process	2/4	361/5905	0.00554017	8.17867	0.0205939	0.0252406	0.00209756	SCD/FASN	2
GO:0044248	cellular catabolic process	2/4	367/5905	0.00544959	8.04496	0.0212553	0.0252406	0.00209756	ARG1/GLUD1	2
GO:0033559	unsaturated fatty acid metabolic process	1/4	37/5905	0.027027	39.8986	0.0248352	0.0285981	0.00237657	SCD	1
GO:0006629	lipid metabolic process	2/4	482/5905	0.00414938	6.12552	0.0357061	0.0399068	0.00331635	SCD/FASN	2

[truncated: 2 more sheets: liver_down_MF, liver_down_kegg]
