# Supplementary material for: Pre-metabolic syndrome transcriptional response of adipose tissue and liver to obesity in the Ossabaw pig model
Source: Research Square preprint supplement (doi:10.21203/rs.3.rs-8039124/v1), 2025-12-06
Supplement: Supplementary file 3 [file 66d71f369ead88f1b3a7c6ad.xlsx]

## Sheet: Sheet1
PigID	Group	Tissue	Flash Frozen (-80°C) / RNAlater	OD260/280	Total RNA ug	RIN	Decision
3	Control	SAT	RNAlater	2.15	0.31	7.1	Go ahead
11	Control	SAT	RNAlater	2.07	0.25	7.5	Go ahead
13	MC-HFD	SAT	RNAlater	1.99	0.41	8.1	Go ahead
13	MC-HFD	VAT	RNAlater	2.09	0.35	7.5	Go ahead
13	MC-HFD	HEART	RNAlater	2.19	4.75	8.1	Go ahead
13	MC-HFD	LIVER	RNAlater	2.18	14.39	7.1	Go ahead
14	MC-HFD	SAT	RNAlater	2.12	0.2	7.6	Go ahead
14	MC-HFD	VAT	RNAlater	2.08	0.17	7.7	Go ahead
14	MC-HFD	LIVER	RNAlater	2.17	22.11	5.8	Hold
14	MC-HFD	HEART	RNAlater	2.19	5.04	2.9	NOT SENT TO BGI
15	MC-HFD	SAT	RNAlater	1.86	0.23	7.5	Go ahead
15	MC-HFD	VAT	RNAlater	2.11	0.35	7.7	Go ahead
15	MC-HFD	LIVER	RNAlater	2.09	10.74	5.8	NOT SENT TO BGI
15	MC-HFD	HEART	RNAlater	2.16	5.27	3.9	NOT SENT TO BGI
20	MC-HFD	SAT	RNAlater	1.85	0.26	7.4	Go ahead
20	MC-HFD	VAT	RNAlater	1.98	1.12	6.9	Go ahead
20	MC-HFD	LIVER	RNAlater	2.16	23.94	7.2	Go ahead
20	MC-HFD	HEART	RNAlater	2.13	3.81	3	NOT SENT TO BGI
25	MC-HFD	SAT	RNAlater	1.97	1.1273	5.4	Hold
25	MC-HFD	VAT	RNAlater	2.18	1.85	6.6	Go ahead
25	MC-HFD	LIVER	RNAlater	2.15	17.69	5.9	NOT SENT TO BGI
25	MC-HFD	HEART	RNAlater	2.13	10.9	7.2	Go ahead
27	MC-HFD	SAT	RNAlater	2.23	0.37	7.6	Go ahead
27	MC-HFD	VAT	RNAlater	2.05	1.06	5.4	Hold
27	MC-HFD	LIVER	RNAlater	2.17	17.85	7.4	Go ahead
27	MC-HFD	HEART	RNAlater	2.17	6.18	2.4	NOT SENT TO BGI
28	MC-HFD	SAT	RNAlater	2.15	0.78	6.7	Go ahead
28	MC-HFD	VAT	RNAlater	2.2	0.83	7.1	Go ahead
28	MC-HFD	LIVER	RNAlater	2.12	18.69	7.8	Go ahead
28	MC-HFD	HEART	RNAlater	2.17	5.72	5.8	Hold
29	MC-HFD	SAT	RNAlater	2.23	0.4	6.9	Go ahead
29	MC-HFD	VAT	RNAlater	2.17	2.48	6.6	Go ahead
29	MC-HFD	LIVER	RNAlater	2.15	19.01	7.7	Go ahead
29	MC-HFD	HEART	RNAlater	2.14	6.18	7.4	Go ahead
9	Control	SAT	FF	2.05	0.6	8.4	Go ahead
9	Control	VAT	FF	2.09	0.55	7.5	Go ahead
9	Control	HEART	RNAlater	-	1.33	8.3	Go ahead
9	Control	LIVER	RNAlater	-	1.49	8.7	Go ahead
18	Control	SAT	FF	2.06	1.13	5.5	Hold
18	Control	VAT	FF	2.11	2.71	7.2	Go ahead
18	Control	HEART	RNAlater	-	1.04	8.7	Go ahead
18	Control	LIVER	RNAlater	-	1.48	9	Go ahead
2	Control	SAT	FF	2.18	0.68	7.1	Go ahead
2	Control	VAT	FF	1.99	3.55	5.8	Hold
2	Control	HEART	RNAlater	2.14	3	8.7	Go ahead
2	Control	LIVER	RNAlater	2.14	5.8	8.7	Go ahead
3	Control	VAT	FF	2.02	1.07	7	Go ahead
3	Control	HEART	RNAlater	2.13	2.95	3	Hold
3	Control	LIVER	RNAlater	2.15	5.99	8.3	Go ahead
11	Control	VAT	FF	2	8.91	7.1	Go ahead
11	Control	HEART	RNAlater	2.16	1.89	7.6	Go ahead
11	Control	LIVER	RNAlater	2.11	1.89	7.7	Go ahead
