# Supplementary material for: Pre-metabolic syndrome transcriptional response of adipose tissue and liver to obesity in the Ossabaw pig model
Source: Research Square preprint supplement (doi:10.21203/rs.3.rs-8039124/v1), 2025-12-06
Supplement: Supplementary file 4 [file 70e53e95da0336e65c603b2f.xlsx]

## Sheet: list based on 8Papers (qPCR)
Gene_name	Description	Source
ABCA1	ATP Binding Cassette Subfamily A Member 1	Cirera 2020, Mentzel 2016, 2018
ABCC2	ATP Binding Cassette Subfamily C Member 2	Cirera 2020, Lützhøft 2024
ABCG1	ATP Binding Cassette Subfamily G Member 1	Cirera 2020, Mentzel 2016, 2018
ACACA	Acetyl-CoA Carboxylase Alpha	Cirera 2020, Mentzel 2016, 2018, Lützhøft 2024, Curtasu 2021
ACTA2	Alpha Actin-2, Alpha Smooth Muscle Actin	Cirera 2020, Lützhøft 2024
ACLY	ATP-citrate lyase	Curtasu 2021
ADAM10	ADAM metallopeptidase domain 10	Jacobsen 2016
ADAM17	ADAM metallopeptidase domain 17	Mentzel 2016
ADCY5	Adenylate Cyclase 5	Cirera 2020
ADIPOQ	Adiponectin, C1Q and Collagen Domain Containing	Cirera 2020, Mentzel 2016, 2018, 2017, Rødgaard 2014, Lützhøft 2024, Curtasu 2021
ADIPOR1	Adiponectin Receptor 1	Cirera 2020, Mentzel 2016, 2018, 2017, Lützhøft 2024, Curtasu 2021
ADIPOR2	Adiponectin Receptor 2	Mentzel 2016, 2018, 2017
ADM	Adrenomedullin	Cirera 2020, Mentzel 2016, 2018, 2017
GRK3	Beta-Adrenergic Receptor Kinase 2 (ADRBK2)	Cirera 2020, Mentzel 2016, 2018, 2017
AGT	Angiotensinogen	Cirera 2020, Lützhøft 2024
AKT2	AKT Serine/Threonine Kinase 2	Cirera 2020, Mentzel 2016, 2018, 2017
ANGPTL4	Angiopoietin Like 4	Cirera 2020, Mentzel 2017
AOAH	Acyloxyacyl hydrolase	Rødgaard 2014
APOA1	Apolipoprotein A-I	Cirera 2020, Mentzel 2016, 2018, 2017, Rødgaard 2014, Lützhøft 2024
APOA4	Apolipoprotein A-IV	Cirera 2020
APOB	Apolipoprotein B-100	Cirera 2020, Mentzel 2018, 2017, Lützhøft 2024
APOC3	Apolipoprotein C-III	Cirera 2020, Lützhøft 2024
BAAT	bile acid-CoA: amino acid N-acyltransferase	Lützhøft 2024
BACH1	BTB domain and CNC homolog 1	Mentzel 2016, 2018
BCL2	Apoptosis Regulator Bcl-2	Cirera 2020, Lützhøft 2024
C1QTNF3	C1q and tumor necrosis factor related protein 3	Jacobsen 2016
C3	complement component 3	Jacobsen 2016, Rødgaard 2014
C5	complement component 5	In-house
CASP1	Caspase 1	Lützhøft 2024
CASP3	Caspase 3	In-house
CASP8	Caspase 8	In-house
CCKAR	cholecystokinin A receptor	Mentzel 2017
CCL2	C-C motif Chemokine 2	Cirera 2020, Mentzel 2016, 2018, 2017, Rødgaard 2014, Lützhøft 2024
CCL4	C-C motif Chemokine 4	In-house
CCL5	C-C motif Chemokine 5	Cirera 2020, Mentzel 2016, 2018, 2017, Rødgaard 2014, Curtasu 2021
CCL3L1	chemokine (C-C motif) ligand 3-like 1	Jacobsen 2016, Rødgaard 2014
CCN2	cellular communication network factor 2, Connective Tissue Growth Factor (CTGF)	Cirera 2020, Lützhøft 2024
CD14	CD14	Rødgaard 2014
CD36	CD36 molecule	Cirera 2020, Rødgaard 2014, Lützhøft 2024
CD40	CD40 Molecule, TNF Receptor Superfamily Member 5	Cirera 2020, Mentzel 2016, 2018, 2017, Rødgaard 2014
CD68	CD68 Molecule, Macrophage Antigen	Cirera 2020, Lützhøft 2024
CD163	CD163	Rødgaard 2014
CD200	CD200	Rødgaard 2014
CEBPA	CCAAT/enhancer binding protein	Mentzel 2016, 2018
CIDEC	Cell Death-Inducing DFFA Like Effector C	Curtasu 2021
CLU	Clusterin	Cirera 2020, Jacobsen 2016
COL1A1	Collagen Alpha-1(I) Chain	Cirera 2020, Lützhøft 2024
COL6A1	Collagen Type VI Alpha 1 Chain	Cirera 2020
COX2	Prostaglandin-endoperoxide synthase 2	Rødgaard 2014
CPT1A	Carnitine Palmitoyltransferase 1A	Cirera 2020, Lützhøft 2024
CRP	C-reactive protein	Mentzel 2016, 2018, 2017, Rødgaard 2014, Curtasu 2021
CXCL10	Chemokine C-X-C motif ligand 10	Rødgaard 2014
CXCL8	Chemokine C-X-C motif ligand 8 (IL8)	Mentzel 2016, 2018, 2017, Rødgaard 2014
CXCL2	Chemokine C-X-C motif ligand 2	In house
CXCL14	C-X-C Motif Chemokine Ligand 14	Cirera 2020, Mentzel 2016, 2018, 2017
CXCR3	C-X-C Motif Chemokine Receptor 3	In house
CXCR4	C-X-C Motif Chemokine Receptor 4	Cirera 2020, Mentzel 2016, 2018, 2017
RIGI	RNA sensor RIG-I	In house
DEFB1	Defensin, beta 2 (PBD-2)	Rødgaard 2014
DGAT2	Diacylglycerol O-acyltransferase 2	Cirera 2020, Mentzel 2016, 2018, 2017, Lützhøft 2024
DICER1	Dicer 1, ribonuclease III	Cirera 2020, Mentzel 2016, 2018
DIO1	Deiodinase, Iodothyronine Type I	Cirera 2020
DUSP10	Dual Specificity Phosphatase 10	Cirera 2020, Mentzel 2017
EBF2	Early B Cell Factor 2	Cirera 2020, Mentzel 2016, 2018, 2017
ELOVL4	ELOVL Fatty Acid Elongase 4	Cirera 2020, Mentzel 2016, 2018, 2017
ELOVL6	ELOVL Fatty Acid Elongase 6	Cirera 2020, Mentzel 2016, 2018, 2017
EIF2AK2	eukaryotic translation initiation factor 2 alpha kinase 2	In house
ETS1	ETS proto-oncogene 1, transcription factor	Mentzel 2016, 2018
FABP4	Fatty Acid Binding Protein 4	Cirera 2020, Mentzel 2016, Lützhøft 2024
FADS1	Fatty Acid Desaturase 1	Cirera 2020
FAS	Fas cell surface death receptor (TNF Receptor Superfamily Member 6)	Cirera 2020, Mentzel 2016, 2018, 2017
FASLG	Fas ligand	In house
FASN	Fatty Acid Synthase	Cirera 2020, Mentzel 2017, Lützhøft 2024, Curtasu 2021
FCGR1A	Fc fragment of IgG, high affinity Ia, receptor (CD64)	Jacobsen 2016
FBP1	Fructose-Biphosphatase 1	Curtasu 2021
FTO	fat mass and obesity associated	Mentzel 2016, 2018
FDFT1	Farnesyl-diphosphate Farnesyltransferase 1	Cirera 2020, Lützhøft 2024
FGG	fibrinogen	Rødgaard 2014
FGF21	Fibroblast Growth Factor 21	Cirera 2020, Lützhøft 2024
FGFR4	Fibroblast Growth Factor Receptor 4	Cirera 2020, Lützhøft 2024
FMO3	Flavin-containing monooxygenase 3	Lützhøft 2024
FOXO1	Hepatocyte Nuclear Factor 3 Alpha Forkhead Box Protein O1	Cirera 2020
FOXA1	Hepatocyte Nuclear Factor 3 Alpha Forkhead Box Protein A1	Cirera 2020, Lützhøft 2024
FOS	Fos proto-oncogene, AP-1 transcription factor subunit	In house
GALNT2	Polypeptide N-Acetylgalactosaminyltransferase	Mentzel 2017
GCG	Glucagon	Cirera 2020, Lützhøft 2024
GCGR	Glucagon receptor	Lützhøft 2024
GCK	Glucokinase (Hexokinase 4)	Cirera 2020, Mentzel 2017, Lützhøft 2024
GCKR	Glucokinase Regulator	Cirera 2020, Lützhøft 2024
GCLM	Glutamate-Cysteine Ligase Modifier Subunit	Cirera 2020, Mentzel 2016, 2018, 2017
GHR	Growth Hormone Receptor	Cirera 2020, Lützhøft 2024
GHSR	Growth hormone secretagogue receptor type 1	In house
GLP1R	Glucagon-like Peptide 1 Receptor	Cirera 2020, Mentzel 2017, Lützhøft 2024
SLC2A2	Solute Carrier Family 2 Member 2 (GLUT2)	Cirera 2020, Mentzel 2017, Lützhøft 2024
SLC2A4	solute carrier family 2 member 4, Glucose Transporter Type 4 (GLUT4)	Cirera 2020, Mentzel 2016, 2018, 2017, Curtasu 2021
SLC2A5	Solute Carrier Family 2 (Facilitated Glucose/Fructose Transporter) Member 5, Glut5	Curtasu 2021
SLC2A8	Solute Carrier Family 2 (Facilitated Glucose Transporter) Member 8, Glut8	Curtasu 2021
GNMT	Glycine N-methyltransferase	Cirera 2020, Lützhøft 2024
GPC4	Glypican 4	Cirera 2020
GPBAR1	G Protein-Coupled Bile Acid Receptor 1	Lützhøft 2024
GPX1	Glutathione Peroxidase 1	Cirera 2020, Lützhøft 2024
GPAM	glycerol-3-phosphate acyltransferase, mitochondrial	Mentzel 2018
GPAT4	glycerol-3-phosphate acyltransferase 4	Mentzel 2016
GRB10	Growth Factor Receptor Bound Protein 10	Cirera 2020, Lützhøft 2024
GZMB	granzyme B	In house
HK1	Hexokinase 1	Curtasu 2021
HLCS	Holocarboxylase Synthetase	Cirera 2020
HMGCR	3-hydroxy-3-methylglutaryl-CoA Reductase	Cirera 2020, Mentzel 2017, Lützhøft 2024
HP	Haptoglobin	Rødgaard 2014, Lützhøft 2024
HSPA14	heat shock protein family A (Hsp70) member 14	In house
ICAM1	Intercellular Adhesion Molecule 1	Cirera 2020, Mentzel 2016, 2018, 2017
ICAM2	Intercellular Adhesion Molecule 2	In house
IDE	Insulin Degrading Enzyme	Cirera 2020, Lützhøft 2024
IDS	Iduronate 2-Sulfatase	Cirera 2020
IFIH1	interferon induced with helicase C domain 1	In house
IFNA1	interferon, alpha 1	In house
IFNG	interferon gamma	Jacobsen 2016, Rødgaard 2014
IFNB1	interferon beta 1	In house
IGF1	Insulin-like Growth Factor I	Cirera 2020, Lützhøft 2024
IGF2BP2	Insulin-like Growth Factor II	Cirera 2020, Lützhøft 2024
IGFBP2	Insulin-like Growth Factor-binding Protein 2	Cirera 2020, Lützhøft 2024
IKBKB	inhibitor of nuclear factor kappa B kinase subunit beta	In house
IL10	Interleukin-10	Mentzel 2016, 2018, 2017, Rødgaard 2014
IL12A	Interleukin-12A	Rødgaard 2014
IL12B	Interleukin-12B	In house
IL15	Interleukin-15	In house
IL18	Interleukin-18	Cirera 2020, Mentzel 2016, 2018, 2017, Rødgaard 2014, Lützhøft 2024
IL33	Interleukin-33	Mentzel 2016, 2018
IL23A	Interleukin-23A	In house
IL1A	interleukin 1, alpha	Jacobsen 2016
IL1B2	Interleukin 1 Beta 2	Cirera 2020, Rødgaard 2014, Lützhøft 2024
IL1R1	interleukin 1 receptor, type I	Jacobsen 2016
IL5	Interleukin 5	Jacobsen 2016
IL6	Interleukin 6	Cirera 2020, Mentzel 2016, 2018, 2017, Rødgaard 2014, Lützhøft 2024, Curtasu 2021
IL6R	Interleukin 6 receptor	Mentzel 2016, 2018
IL13RA2	interleukin 13 receptor, alpha 2	Jacobsen 2016
INS	insulin	Mentzel 2017
INSIG1	Insulin-induced Gene 1 Protein	Cirera 2020, Mentzel 2016, 2017, Lützhøft 2024
INSIG2	Insulin-induced Gene 2 Protein	Cirera 2020, Lützhøft 2024
INPPL1	inositol polyphosphate phosphatase like 1	Mentzel 2018
INSR	Insulin Receptor	Cirera 2020, Lützhøft 2024
IRAK1	interleukin 1 receptor associated kinase 1	In house
IRF3	interferon regulatory factor 3	In house
IRF1	interferon regulatory factor 1	In house
IRF2	interferon regulatory factor 2	In house
IRF7	interferon regulatory factor 7	In house
IRS1	Insulin Receptor Substrate 1	Cirera 2020, Mentzel 2016, 2018, 2017, Lützhøft 2024
IRS2	Insulin Receptor Substrate 2	Cirera 2020, Lützhøft 2024
IRX3	Iroquois Homeobox 3	Cirera 2020
ISG15	ISG15 ubiquitin like modifier	In house
ISLR	Immunoglobulin Superfamily Containing Leucine Rich Repeat	Cirera 2020, Mentzel 2017
ITIH4	Inter-alpha-trypsin inhibitor heavy chain family, member 4	Rødgaard 2014
ITGB1	Integrin beta1	Mentzel 2016
JAG1	Jagged 1	Cirera 2020, Mentzel 2016, 2018, 2017, Lützhøft 2024
JAK1	Janus kinase 1	In house
JUN	Jun proto-oncogene, AP-1 transcription factor subunit	In house
JAK2	Janus kinase 2	In house
KLB	Beta-Klotho	Cirera 2020, Mentzel 2016, 2018, 2017, Lützhøft 2024
LBP	Lipopolysaccharide binding protein	Rødgaard 2014
LCAT	Lecithin-cholesterol Acyltransferase	Cirera 2020, Mentzel 2017, Lützhøft 2024
LCN2	Lipocalin 2 (Neutrophil Gelatinase-Associated Lipocalin)	Cirera 2020, Mentzel 2018, 2016, 2017
LDAH	L-lactate Dehydrogenase A Chain	Cirera 2020, Mentzel 2017, Lützhøft 2024
LDLR	Low Density Lipoprotein Receptor	Cirera 2020, Mentzel 2018, 2017, Lützhøft 2024
LEP	Leptin	Cirera 2020, Mentzel 2016, 2018, 2017, Lützhøft 2024, Curtasu 2021
LEPR	Leptin Receptor	Cirera 2020, Mentzel 2016, 2018, 2017, Lützhøft 2024, Curtasu 2021
LIPE	lipase E	Mentzel 2017
LITAF	Lipopolysaccharide Induced TNF Factor	Cirera 2020, Mentzel 2016, 2018, 2017
LPIN1	Lipin 1	Cirera 2020, Mentzel 2016, 2018, 2017, Lützhøft 2024
LPL	Lipoprotein Lipase	Cirera 2020, Lützhøft 2024
LTF	lactotransferrin	In house
LSS	Lanosterol Synthase (2,3-Oxidosqualene-Lanosterol Cyclase)	Cirera 2020, Mentzel 2018, 2017
LY96	lymphocyte antigen 96	In house
MBOAT7	Membrane Bound O-acyltransferase Domain Containing 7	Cirera 2020, Lützhøft 2024
MC4R	Melanocortin 4 Receptor	Cirera 2020
MCM5	Minichromosome Maintenance Complex Component 5	Cirera 2020, Lützhøft 2024
MCL1	MCL1 apoptosis regulator, BCL2 family member	In house
MGP	matrix Gla protein	Jacobsen 2016
MRTFA	myocardin related transcription factor A	Cirera 2020, Mentzel 2018
MMP2	Matrix Metallopeptidase 2	Cirera 2020, Lützhøft 2024
MMP9	Matrix Metalloproteinase-9	Cirera 2020, Mentzel 2017, Lützhøft 2024
MOCOS	Molybdenum Cofactor Sulfurase	Cirera 2020, Mentzel 2016, 2018, 2017
MSTN	myostatin	Mentzel 2016, 2018
MTOR	Mechanistic Target of Rapamycin Kinase	Cirera 2020, Lützhøft 2024
MTTP	Microsomal Triglyceride Transfer Protein Large Subunit	Cirera 2020, Lützhøft 2024
MYC	Myc Proto-Oncogene, bHLH Transcription Factor	Cirera 2020, Mentzel 2016, 2018, 2017
MYH7	myosin, heavy chain 7, cardiac muscle	Mentzel 2018
MYD88	MYD88 innate immune signal transduction adaptor	In house
MX1	MX dynamin like GTPase 1	In house
NAMPT	nicotinamide phosphoribosyltransferase	Jacobsen 2016
NCOR2	Nuclear Receptor Corepressor 2	Cirera 2020, Mentzel 2016, 2018
NEGR1	Neuronal Growth Regulator 1	Cirera 2020, Mentzel 2016, 2018
NFKB1	Nuclear factor NF-kappa-B	Mentzel 2016, 2017, Rødgaard 2014
NFKBIA	NFKB Inhibitor Alpha	Cirera 2020, Mentzel 2016, 2018, 2017, Rødgaard 2014
NLRP3	NLR family pyrin domain containing 3	Lützhøft 2024
NR1H4	Nuclear Receptor Subfamily 1 Group H Member 4	Lützhøft 2024
NPEPL1	Aminopeptidase-like 1	Cirera 2020
NR1D1	Nuclear Receptor Subfamily 1 Group D Member 1	Cirera 2020
NR1I2	Nuclear Receptor Subfamily 1 Group I Member 2	Cirera 2020, Mentzel 2017, Lützhøft 2024
NR3C1	Nuclear Receptor Subfamily 3 Group C Member 1 (Glucocorticoid Receptor)	Cirera 2020, Lützhøft 2024
OAS1	2'-5'-oligoadenylate synthetase 1	In house
OASL	2'-5'-oligoadenylate synthetase like	In house
ORM1	Orosomucoid 1	Rødgaard 2014
OSBPL10	Oxysterol Binding Protein Like 10	Mentzel 2018
PAFAH1B1	Platelet-activating factor acetylhydrolase 1b	Rødgaard 2014
PCSK9	Proprotein Convertase Subtilisin/Kexin Type 9	Cirera 2020, Lützhøft 2024
PECR	peroxisomal trans-2-enoyl-CoA reductase	Mentzel 2016, 2018, 2017
PEG10	Paternally Expressed 10	Cirera 2020
PELI2	Pellino E3 Ubiquitin Protein Ligase Family Member 2	Cirera 2020, Mentzel 2016, 2018, 2017
PFKM	Phosphofructokinase, Muscle	Curtasu 2021
PEMT	Phosphatidylethanolamine N-methyltransferase	Cirera 2020, Lützhøft 2024
PIAS3	protein inhibitor of activated STAT, 3	Jacobsen 2016
PNPLA2	Patatin like Phospholipase Domain Containing 2	Cirera 2020, Lützhøft 2024
PNPLA3	Patatin-like Phospholipase Domain Containing 3	Cirera 2020, Mentzel 2016, 2018, 2017, Lützhøft 2024
PON1	Paraoxonase 1	Cirera 2020
PPARA	Peroxisome Proliferator Activated Receptor Alpha	Cirera 2020, Mentzel 2016, 2018, 2017, Lützhøft 2024
PPARD	Peroxisome Proliferator Activated Receptor Delta	Cirera 2020, Mentzel 2017
PPARG	Peroxisome Proliferator Activated Receptor Gamma	Cirera 2020, Mentzel 2016, 2018, 2017, Lützhøft 2024, Curtasu 2021
PPARGC1A	Peroxisome Proliferator Activated Receptor Gamma Coactivator 1-alpha	Cirera 2020, Lützhøft 2024
PRKCA	protein kinase C, alpha	Mentzel 2017
PRKCD	protein kinase C, delta	Mentzel 2017
PRKG1	Protein Kinase cGMP-Dependent 1	Cirera 2020
PTGS2	Prostaglandin-Endoperoxide Synthase 2, COX2	In house
PTX3	Pentraxin 3	In house
RAB27A	RAB27A, Member RAS Oncogene Family	Mentzel 2016
RBP4	Retinol-binding Protein 4	Cirera 2020, Lützhøft 2024
REPIN1	Replication initiator 1	Lützhøft 2024
RDH5	Retinol Dehydrogenase 5	Cirera 2020
RHOB	Ras Homolog Family Member B,	Mentzel 2017
RHOQ	Ras Homolog Family Member Q	Cirera 2020, Mentzel 2017
RNF10	Ring Finger Protein 10	Mentzel 2016
RORA	RAR Related Orphan Receptor A	Cirera 2020, Mentzel 2016, 2018, Lützhøft 2024
RPLP2	Ribosomal Protein Lateral Stalk Subunit P2	Cirera 2020
RPS29	Ribosomal Protein S29	Cirera 2020, Mentzel 2016, 2018
SAAL1	Serum Amyloid A like 1	Cirera 2020, Mentzel 2016, 2018, 2017, Rødgaard 2014
SCAP	SREBF chaperone	Cirera 2020, Lützhøft 2024
SCARB1	Scavenger Receptor Class B Member 1, Splice Variant 1	Cirera 2020, Mentzel 2017, Lützhøft 2024
SCD	Stearoyl-CoA Desaturase	Cirera 2020, Mentzel 2016, Lützhøft 2024
SELL	selectin L	In house
SELP	selectin P	In house
SERPINE1	Serpin family E member 1	In house
SERPINE2	Proteinase Nexin 1 (Serpin Peptidase Inhibitor, Clade E, Member 2) (PN1)	Cirera 2020, Mentzel 2016, 2018, 2017
SEPTIN9	Septin 9	Cirera 2020
SFTPA1	Surfactant protein A1	Rødgaard 2014
SIRT1	sirtuin 1	Mentzel 2016, 2018
SIM1	Single-minded Family bHLH Transcription Factor 1	Cirera 2020
SMAD6	SMAD Family Member 6	Cirera 2020, Mentzel 2016, 2018
SMPDL3A	Sphingomyelin Phosphodiesterase Acid-Like 3A	Cirera 2020, Mentzel 2016, 2018, 2017
SNAI2	zinc finger protein	Mentzel 2016, 2017
SOD1	Superoxide dismutase 1, Cytosolic	Cirera 2020, Lützhøft 2024
SOD2	Superoxide Fismutase 2, Mitochondrial	Cirera 2020, Lützhøft 2024
SOCS1	Suppressor of cytokine signaling 1	In house
SP1	Specificity Protein 1 Transcription Factor	Cirera 2020, Mentzel 2016, 2018
SPP1	Secreted Phosphoprotein 1	Cirera 2020, Mentzel 2018, 2017, Lützhøft 2024
SREBF1	sterol regulatory element binding transcription factor 1	Jacobsen 2016, Lützhøft 2024, Cirera 2020, Mentzel 2016, 2018,
SREBF2	Sterol Regulatory Element Binding Transcription Factor 2	Cirera 2020
STAT1	Signal Transducer and Activator of Transcription 1	In house
STAT2	Signal Transducer and Activator of Transcription 2	In house
STAT3	Signal Transducer and Activator of Transcription 3	Cirera 2020, Lützhøft 2024
STAT6	Signal Transducer and Activator of Transcription 6	Mentzel 2016, 2018
STIM1	Stromal Interaction Molecule 1	Cirera 2020, Mentzel 2016, 2018, 2017
STRADA	activator of enzymes in lipid metabolism	Mentzel 2016, 2018
TBC1D4	TBC1 Domain Family Member 4	Mentzel 2017
TBCD	Tubulin Folding Cofactor D	Cirera 2020
TCF7L2	Transcription Factor 7-like 2	Cirera 2020, Lützhøft 2024
TECPR2	Tectonin Beta-Propeller Repeat Containing 2	Cirera 2020, Mentzel 2016, 2018
TF	transferrin	Rødgaard 2014
TGFB1	Transforming Growth Factor Beta 1	Cirera 2020, Mentzel 2016, 2018, Rødgaard 2014, Lützhøft 2024
TGFB3	Transforming Growth Factor Beta 3	Cirera 2020
TIMP1	Metalloproteinase Inhibitor 1	Cirera 2020, Lützhøft 2024
TICAM1	Toll like receptor adaptor molecule	In house
TLR1	Toll Like Receptor 1	Jacobsen 2016
TLR2	Toll Like Receptor 2	Jacobsen 2016
TLR4	Toll Like Receptor 4	Cirera 2020, Mentzel 2016, 2018, Rødgaard 2014, Lützhøft 2024
TLR3	Toll Like Receptor 3	In house
TLR6	Toll Like Receptor 6	In house
TLR7	Toll Like Receptor 7	In house
TM6SF2	Transmembrane 6 Superfamily Member 2	Cirera 2020, Lützhøft 2024
TNF	Tumor Necrosis Factor	Cirera 2020, Mentzel 2016, 2018, 2017, 2017, Rødgaard 2014, Lützhøft 2024, Curtasu 2021
TNFAIP8L2	tumor necrosis factor, alpha-induced protein 8-like 2	Jacobsen 2016
TNFRSF1A	TNF Receptor Superfamily Member 1A	Cirera 2020, Lützhøft 2024
TNFAIP8	tumor necrosis factor, alpha-induced protein 8	Jacobsen 2016
TNFAIP3	tumor necrosis factor, alpha-induced protein 3	Mentzel 2016, Rødgaard 2014
TNFSF13B	TNF superfamily member 13b	Jacobsen 2016
TNS3	Tensin 3	Cirera 2020
TP53	tumor protein 53	Mentzel 2016, 2018
TREM1	Triggering receptor expressed on myeloid cells 1	In house
UCP2	uncoupling protein 2	Mentzel 2016, 2018, 2017, Lützhøft 2024
UCP3	uncoupling protein 3	Mentzel 2016, 2018, 2017, Lützhøft 2024
USF1	Upstream Transcription Factor 1	Cirera 2020, Mentzel 2018
VCAM1	Vascular cell adhesion molecule 1	In house
references
Jacobsen 2016	Jacobsen MJ, Mentzel CMJ, Olesen AS, Huby T, Jørgensen CB, Barrès R, et al. Altered Methylation Profile of Lymphocytes Is Concordant with Perturbation of Lipids Metabolism and Inflammatory Response in Obesity. Journal of Diabetes Research. 2016;2016:1–11.
Mentzel 2018	Mentzel CMJ, Cardoso TF, Pipper CB, Jacobsen MJ, Jørgensen CB, Cirera S, et al. Deregulation of obesity-relevant genes is associated with progression in BMI and the amount of adipose tissue in pigs. Mol Genet Genomics. 2018 Feb;293(1):129–36.
Cirera 2020	Cirera S, Taşöz E, Juul Jacobsen M, Schumacher-Petersen C, Østergaard Christoffersen B, Kaae Kirk R, et al. The expression signatures in liver and adipose tissue from obese Göttingen Minipigs reveal a predisposition for healthy fat accumulation. Nutr Diabetes. 2020 Mar 23;10(1):9.
Rødgaard 2014	Rødgaard T, Skovgaard K, Moesgaard SG, Cirera S, Christoffersen BØ, Heegaard PMH. Extensive changes in innate immune gene expression in obese G öttingen minipigs do not lead to changes in concentrations of circulating cytokines and acute phase proteins. Animal Genetics. 2014 Feb;45(1):67–73.
Mentzel 2017	Mentzel CMJ, Cardoso TF, Lex AMJ, Sørensen DB, Fredholm M, Cirera S. Fat and carbohydrate content in the diet induces drastic changes in gene expression in young Göttingen minipigs. Mamm Genome. 2017 Jun;28(5–6):166–75.
Lützhøft 2024	Lützhøft DO, Bækgård C, Wimborne E, Straarup EM, Pedersen KM, Swann JR, et al. High fat diet is associated with gut microbiota dysbiosis and decreased gut microbial derived metabolites related to metabolic health in young Göttingen Minipigs. Sen U, editor. PLoS ONE. 2024 Mar 1;19(3):e0298602.
Mentzel 2016	Mentzel CMJ, Alkan F, Keinicke H, Jacobsen MJ, Gorodkin J, Fredholm M, et al. Joint Profiling of miRNAs and mRNAs Reveals miRNA Mediated Gene Regulation in the Göttingen Minipig Obesity Model. Zheng Y, editor. PLoS ONE. 2016 Nov 30;11(11):e0167285.
Curtasu 2021	Curtasu MV, Skou Hedemann M, Nygaard Lærke H, Bach Knudsen KE. Obesity Development and Signs of Metabolic Abnormalities in Young Göttingen Minipigs Consuming Energy Dense Diets Varying in Carbohydrate Quality. Nutrients. 2021 May;13(5):1560.

## Sheet: STRING list
Gene symbol	Gene description	disease score	species	Gene family
PDK4	[Pyruvate dehydrogenase (acetyl-transferring)] kinase isozyme 4, mitochondrial; Kinase that plays a key role in regulation of glucose and fatty acid metabolism and homeostasis via phosphorylation of the pyruvate dehydrogenase subunits PDHA1 and PDHA2. This inhibits pyruvate dehydrogenase activity, and thereby regulates metabolite flux through the tricarboxylic acid cycle, down-regulates aerobic r…	2.78354	Homo sapiens	Kinase
MTOR	Serine/threonine-protein kinase mTOR; Serine/threonine protein kinase which is a central regulator of cellular metabolism, growth and survival in response to hormones, growth factors, nutrients, energy and stress signals. MTOR directly or indirectly regulates the phosphorylation of at least 800 proteins. Functions as part of 2 structurally and functionally distinct signaling complexes mTORC1 and …	3.40585	Homo sapiens	Kinase
PER2	Period circadian protein homolog 2; Transcriptional repressor which forms a core component of the circadian clock. The circadian clock, an internal time-keeping system, regulates various physiological processes through the generation of approximately 24 hour circadian rhythms in gene expression, which are translated into rhythms in metabolism and behavior. It is derived from the Latin roots 'circ…	2.76266	Homo sapiens	Other
SLC2A2	Solute carrier family 2, facilitated glucose transporter member 2; Facilitative hexose transporter that mediates the transport of glucose and fructose. Likely mediates the bidirectional transfer of glucose across the plasma membrane of hepatocytes and is responsible for uptake of glucose by the beta cells; may comprise part of the glucose-sensing mechanism of the beta cell. May also participate w…	3.01651	Homo sapiens	Transporter
PLIN1	Perilipin-1; Modulator of adipocyte lipid metabolism. Coats lipid storage droplets to protect them from breakdown by hormone-sensitive lipase (HSL). Its absence may result in leanness. Plays a role in unilocular lipid droplet formation by activating CIDEC. Their interaction promotes lipid droplet enlargement and directional net neutral lipid transfer. May modulate lipolysis and triglyceride level…	3.23921	Homo sapiens	Other
ARNTL	Aryl hydrocarbon receptor nuclear translocator-like protein 1; Transcriptional activator which forms a core component of the circadian clock. The circadian clock, an internal time-keeping system, regulates various physiological processes through the generation of approximately 24 hour circadian rhythms in gene expression, which are translated into rhythms in metabolism and behavior. It is derived…	2.97384	Homo sapiens	Transcription Factor
MSTN	Growth/differentiation factor 8; Acts specifically as a negative regulator of skeletal muscle growth; Belongs to the TGF-beta family.	2.89021	Homo sapiens	Other
SIRT3	NAD-dependent protein deacetylase sirtuin-3, mitochondrial; NAD-dependent protein deacetylase. Activates or deactivates mitochondrial target proteins by deacetylating key lysine residues. Known targets include ACSS1, IDH, GDH, SOD2, PDHA1, LCAD, SDHA and the ATP synthase subunit ATP5PO. Contributes to the regulation of the cellular energy metabolism. Important for regulating tissue-specific ATP l…	2.87365	Homo sapiens	Epigenetic
DGAT2	Diacylglycerol O-acyltransferase 2; Essential acyltransferase that catalyzes the terminal and only committed step in triacylglycerol synthesis by using diacylglycerol and fatty acyl CoA as substrates. Required for synthesis and storage of intracellular triglycerides. Probably plays a central role in cytosolic lipid accumulation. In liver, is primarily responsible for incorporating endogenously sy…	2.863	Homo sapiens	Enzyme
LEP	Leptin; Key player in the regulation of energy balance and body weight control. Once released into the circulation, has central and peripheral effects by binding LEPR, found in many tissues, which results in the activation of several major signaling pathways. In the hypothalamus, acts as an appetite-regulating factor that induces a decrease in food intake and an increase in energy consumption by …	4.8	Homo sapiens	Other
ADIPOQ	Adiponectin; Important adipokine involved in the control of fat metabolism and insulin sensitivity, with direct anti-diabetic, anti-atherogenic and anti-inflammatory activities. Stimulates AMPK phosphorylation and activation in the liver and the skeletal muscle, enhancing glucose utilization and fatty-acid combustion. Antagonizes TNF-alpha by negatively regulating its expression in various tissue…	4.8	Homo sapiens	Other
IRS2	Insulin receptor substrate 2; May mediate the control of various cellular processes by insulin.	3.08938	Homo sapiens	Other
CIDEA	Cell death activator CIDE-A; Acts as a CEBPB coactivator in mammary epithelial cells to control the expression of a subset of CEBPB downstream target genes, including ID2, IGF1, PRLR, SOCS1, SOCS3, XDH, but not casein. By interacting with CEBPB, strengthens the association of CEBPB with the XDH promoter, increases histone acetylation and dissociates HDAC1 from the promoter (By similarity). Binds …	3.13282	Homo sapiens	Other
GCK	Hexokinase-4; Catalyzes the phosphorylation of hexose, such as D-glucose, D-fructose and D-mannose, to hexose 6-phosphate (D-glucose 6-phosphate, D-fructose 6-phosphate and D-mannose 6-phosphate, respectively). Compared to other hexokinases, has a weak affinity for D-glucose, and is effective only when glucose is abundant (By similarity). Mainly expressed in pancreatic beta cells and the liver an…	2.8991	Homo sapiens	Kinase
ACLY	ATP-citrate synthase; Catalyzes the cleavage of citrate into oxaloacetate and acetyl-CoA, the latter serving as common substrate for de novo cholesterol and fatty acid synthesis. In the N-terminal section; belongs to the succinate/malate CoA ligase beta subunit family.	2.75484	Homo sapiens	Enzyme
G6PC2	Glucose-6-phosphatase 2; May hydrolyze glucose-6-phosphate to glucose in the endoplasmic reticulum. May be responsible for glucose production through glycogenolysis and gluconeogenesis (By similarity).	2.83975	Homo sapiens	Enzyme
G6PC3	Glucose-6-phosphatase 3; Hydrolyzes glucose-6-phosphate to glucose in the endoplasmic reticulum. May form with the glucose-6-phosphate transporter (SLC37A4/G6PT) a ubiquitously expressed complex responsible for glucose production through glycogenolysis and gluconeogenesis. Probably required for normal neutrophil function.	2.80786	Homo sapiens	Enzyme
ABCA1	Phospholipid-transporting ATPase ABCA1; Catalyzes the translocation of specific phospholipids from the cytoplasmic to the extracellular/lumenal leaflet of membrane coupled to the hydrolysis of ATP. Thereby, participates to phospholipids transfer to apoliproteins to form nascent high density lipoproteins/HDLs. Transports preferentially phosphatidylcholine over phosphatidylserine. May play a simila…	2.921	Homo sapiens	Transporter
FGF21	Fibroblast growth factor 21; Stimulates glucose uptake in differentiated adipocytes via the induction of glucose transporter SLC2A1/GLUT1 expression (but not SLC2A4/GLUT4 expression). Activity requires the presence of KLB. Belongs to the heparin-binding growth factors family.	3.47182	Homo sapiens	Other
SOD2-2	Superoxide dismutase; Destroys radicals which are normally produced within the cells and which are toxic to biological systems. Belongs to the iron/manganese superoxide dismutase family.	3.213	Homo sapiens
ACTB	Actin, cytoplasmic 1, N-terminally processed; Actin is a highly conserved protein that polymerizes to produce filaments that form cross-linked networks in the cytoplasm of cells. Actin exists in both monomeric (G-actin) and polymeric (F-actin) forms, both forms playing key functions, such as cell motility and contraction. In addition to their role in the cytoplasmic cytoskeleton, G- and F-actin a…	3.23335	Homo sapiens	Other
ACACA	Acetyl-CoA carboxylase 1; Cytosolic enzyme that catalyzes the carboxylation of acetyl- CoA to malonyl-CoA, the first and rate-limiting step of de novo fatty acid biosynthesis. This is a 2 steps reaction starting with the ATP-dependent carboxylation of the biotin carried by the biotin carboxyl carrier (BCC) domain followed by the transfer of the carboxyl group from carboxylated biotin to acetyl-Co…	2.9787	Homo sapiens	Enzyme
HIF1A	Hypoxia-inducible factor 1-alpha; Functions as a master transcriptional regulator of the adaptive response to hypoxia. Under hypoxic conditions, activates the transcription of over 40 genes, including erythropoietin, glucose transporters, glycolytic enzymes, vascular endothelial growth factor, HILPDA, and other genes whose protein products increase oxygen delivery or facilitate metabolic adaptati…	3.00335	Homo sapiens	Transcription Factor
TFAM	Transcription factor A, mitochondrial; Binds to the mitochondrial light strand promoter and functions in mitochondrial transcription regulation. Component of the mitochondrial transcription initiation complex, composed at least of TFB2M, TFAM and POLRMT that is required for basal transcription of mitochondrial DNA. In this complex, TFAM recruits POLRMT to a specific promoter whereas TFB2M induces…	2.7832	Homo sapiens	Transcription Factor
SCD	Acyl-CoA desaturase; Stearyl-CoA desaturase that utilizes O(2) and electrons from reduced cytochrome b5 to introduce the first double bond into saturated fatty acyl-CoA substrates. Catalyzes the insertion of a cis double bond at the delta-9 position into fatty acyl-CoA substrates including palmitoyl-CoA and stearoyl-CoA. Gives rise to a mixture of 16:1 and 18:1 unsaturated fatty acids. Plays an i…	3.1898	Homo sapiens	Enzyme
LIPE	Hormone-sensitive lipase; In adipose tissue and heart, it primarily hydrolyzes stored triglycerides to free fatty acids, while in steroidogenic tissues, it principally converts cholesteryl esters to free cholesterol for steroid hormone production.	4.67421	Homo sapiens	Enzyme
SIRT1	NAD-dependent protein deacetylase sirtuin-1; NAD-dependent protein deacetylase that links transcriptional regulation directly to intracellular energetics and participates in the coordination of several separated cellular functions such as cell cycle, response to DNA damage, metabolism, apoptosis and autophagy. Can modulate chromatin function through deacetylation of histones and can promote alter…	3.428	Homo sapiens	Epigenetic
FABP4	Fatty acid-binding protein, adipocyte; Lipid transport protein in adipocytes. Binds both long chain fatty acids and retinoic acid. Delivers long-chain fatty acids and retinoic acid to their cognate receptors in the nucleus. Belongs to the calycin superfamily. Fatty-acid binding protein (FABP) family.	3.42549	Homo sapiens	Other
UCP2	Mitochondrial uncoupling protein 2; UCP are mitochondrial transporter proteins that create proton leaks across the inner mitochondrial membrane, thus uncoupling oxidative phosphorylation from ATP synthesis. As a result, energy is dissipated in the form of heat; Belongs to the mitochondrial carrier (TC 2.A.29) family.	3.20016	Homo sapiens	Other
LPL	Lipoprotein lipase; Key enzyme in triglyceride metabolism. Catalyzes the hydrolysis of triglycerides from circulating chylomicrons and very low density lipoproteins (VLDL), and thereby plays an important role in lipid clearance from the blood stream, lipid utilization and storage. Mediates margination of triglyceride-rich lipoprotein particles in capillaries. Recruited to its site of action on th…	3.38621	Homo sapiens	Enzyme
PNPLA2	Patatin-like phospholipase domain-containing protein 2; Catalyzes the initial step in triglyceride hydrolysis in adipocyte and non-adipocyte lipid droplets. Also has acylglycerol transacylase activity. May act coordinately with LIPE/HLS within the lipolytic cascade. Regulates adiposome size and may be involved in the degradation of adiposomes. May play an important role in energy homeostasis. May…	3.3214	Homo sapiens	Enzyme
SLC2A1	Solute carrier family 2, facilitated glucose transporter member 1; Facilitative glucose transporter, which is responsible for constitutive or basal glucose uptake. Has a very broad substrate specificity; can transport a wide range of aldoses including both pentoses and hexoses. Most important energy carrier of the brain: present at the blood-brain barrier and assures the energy-independent, facil…	2.74595	Homo sapiens	Transporter
UCP1	Mitochondrial brown fat uncoupling protein 1; Mitochondrial protein responsible for thermogenic respiration, a specialized capacity of brown adipose tissue and beige fat that participates to non-shivering adaptive thermogenesis to temperature and diet variations and more generally to the regulation of energy balance (By similarity). Functions as a long-chain fatty acid/LCFA and proton symporter, …	4.77121	Homo sapiens	Other
PLIN2	Perilipin-2; May be involved in development and maintenance of adipose tissue; Belongs to the perilipin family.	2.7788	Homo sapiens	Other
AKT1	RAC-alpha serine/threonine-protein kinase; AKT1 is one of 3 closely related serine/threonine-protein kinases (AKT1, AKT2 and AKT3) called the AKT kinase, and which regulate many processes including metabolism, proliferation, cell survival, growth and angiogenesis. This is mediated through serine and/or threonine phosphorylation of a range of downstream substrates. Over 100 substrate candidates ha…	3.56667	Homo sapiens	Kinase
SREBF1	Processed sterol regulatory element-binding protein 1; Transcriptional activator required for lipid homeostasis. Regulates transcription of the LDL receptor gene as well as the fatty acid and to a lesser degree the cholesterol synthesis pathway (By similarity). Binds to the sterol regulatory element 1 (SRE-1) (5'- ATCACCCCAC-3'). Has dual sequence specificity binding to both an E-box motif (5'-AT…	3.60274	Homo sapiens	Transcription Factor
G6PC	Glucose-6-phosphatase; Hydrolyzes glucose-6-phosphate to glucose in the endoplasmic reticulum. Forms with the glucose-6-phosphate transporter (SLC37A4/G6PT) the complex responsible for glucose production through glycogenolysis and gluconeogenesis. Hence, it is the key enzyme in homeostatic regulation of blood glucose levels; Belongs to the glucose-6-phosphatase family.	3.03737	Homo sapiens	Enzyme
SCARB1	Scavenger receptor class B member 1; Receptor for different ligands such as phospholipids, cholesterol ester, lipoproteins, phosphatidylserine and apoptotic cells. Receptor for HDL, mediating selective uptake of cholesteryl ether and HDL-dependent cholesterol efflux. Also facilitates the flux of free and esterified cholesterol between the cell surface and apoB-containing lipoproteins and modified…	3.36668	Homo sapiens	Other
GAPDH	Glyceraldehyde-3-phosphate dehydrogenase; Has both glyceraldehyde-3-phosphate dehydrogenase and nitrosylase activities, thereby playing a role in glycolysis and nuclear functions, respectively. Participates in nuclear events including transcription, RNA transport, DNA replication and apoptosis. Nuclear functions are probably due to the nitrosylase activity that mediates cysteine S-nitrosylation o…	3.19047	Homo sapiens	Enzyme
PPARGC1B	Peroxisome proliferator-activated receptor gamma coactivator 1-beta; Plays a role of stimulator of transcription factors and nuclear receptors activities. Activates transcriptional activity of estrogen receptor alpha, nuclear respiratory factor 1 (NRF1) and glucocorticoid receptor in the presence of glucocorticoids. May play a role in constitutive non-adrenergic-mediated mitochondrial biogenesis …	2.76932	Homo sapiens	Other
FOXO1	Forkhead box protein O1; Transcription factor that is the main target of insulin signaling and regulates metabolic homeostasis in response to oxidative stress. Binds to the insulin response element (IRE) with consensus sequence 5'-TT[G/A]TTTTG-3' and the related Daf-16 family binding element (DBE) with consensus sequence 5'-TT[G/A]TTTAC-3'. Activity suppressed by insulin. Main regulator of redox …	3.1058	Homo sapiens	Transcription Factor
PCK1	Phosphoenolpyruvate carboxykinase, cytosolic [GTP]; Regulates cataplerosis and anaplerosis, the processes that control the levels of metabolic intermediates in the citric acid cycle. At low glucose levels, it catalyzes the cataplerotic conversion of oxaloacetate (OAA) to phosphoenolpyruvate (PEP), the rate-limiting step in the metabolic pathway that produces glucose from lactate and other precurs…	2.7676	Homo sapiens	Kinase
FASN	3-hydroxyacyl-[acyl-carrier-protein] dehydratase; Fatty acid synthetase catalyzes the formation of long-chain fatty acids from acetyl-CoA, malonyl-CoA and NADPH. This multifunctional protein has 7 catalytic activities as an acyl carrier protein.	3.23795	Homo sapiens	Enzyme
SCARB2	Lysosome membrane protein 2; Acts as a lysosomal receptor for glucosylceramidase (GBA) targeting.	3.32353	Homo sapiens	Other
ACOX1	Peroxisomal acyl-CoA oxidase 1, A chain; Catalyzes the desaturation of acyl-CoAs to 2-trans-enoyl-CoAs. Isoform 1 shows highest activity against medium-chain fatty acyl-CoAs and activity decreases with increasing chain length. Isoform 2 is active against a much broader range of substrates and shows activity towards very long-chain acyl-CoAs. Isoform 2 is twice as active as isoform 1 against 16-hy…	2.94461	Homo sapiens	Enzyme
PPARG	Peroxisome proliferator-activated receptor gamma; Nuclear receptor that binds peroxisome proliferators such as hypolipidemic drugs and fatty acids. Once activated by a ligand, the nuclear receptor binds to DNA specific PPAR response elements (PPRE) and modulates the transcription of its target genes, such as acyl-CoA oxidase. It therefore controls the peroxisomal beta-oxidation pathway of fatty a…	4.78805	Homo sapiens	Nuclear Receptor
CPT1A	Carnitine O-palmitoyltransferase 1, liver isoform; Catalyzes the transfer of the acyl group of long-chain fatty acid-CoA conjugates onto carnitine, an essential step for the mitochondrial uptake of long-chain fatty acids and their subsequent beta-oxidation in the mitochondrion. Plays an important role in triglyceride metabolism.	3.04845	Homo sapiens	Enzyme
IRS1	Insulin receptor substrate 1; May mediate the control of various cellular processes by insulin. When phosphorylated by the insulin receptor binds specifically to various cellular proteins containing SH2 domains such as phosphatidylinositol 3-kinase p85 subunit or GRB2. Activates phosphatidylinositol 3-kinase when bound to the regulatory p85 subunit (By similarity).	3.54624	Homo sapiens	Other
CD36	Platelet glycoprotein 4; Multifunctional glycoprotein that acts as receptor for a broad range of ligands. Ligands can be of proteinaceous nature like thrombospondin, fibronectin, collagen or amyloid-beta as well as of lipidic nature such as oxidized low-density lipoprotein (oxLDL), anionic phospholipids, long-chain fatty acids and bacterial diacylated lipopeptides. They are generally multivalent …	3.37786	Homo sapiens	Other
PPARD	Peroxisome proliferator-activated receptor delta; Ligand-activated transcription factor. Receptor that binds peroxisome proliferators such as hypolipidemic drugs and fatty acids. Has a preference for poly-unsaturated fatty acids, such as gamma- linoleic acid and eicosapentanoic acid. Once activated by a ligand, the receptor binds to promoter elements of target genes. Regulates the peroxisomal bet…	3.1577	Homo sapiens	Nuclear Receptor
CYCS	Cytochrome c; Electron carrier protein. The oxidized form of the cytochrome c heme group can accept an electron from the heme group of the cytochrome c1 subunit of cytochrome reductase. Cytochrome c then transfers this electron to the cytochrome oxidase complex, the final protein carrier in the mitochondrial electron-transport chain.	2.76432	Homo sapiens	Other
CPT1B	Carnitine O-palmitoyltransferase 1, muscle isoform; Carnitine palmitoyltransferase 1B.	2.737	Homo sapiens	Enzyme
UCP3	Mitochondrial uncoupling protein 3; UCP are mitochondrial transporter proteins that create proton leaks across the inner mitochondrial membrane, thus uncoupling oxidative phosphorylation. As a result, energy is dissipated in the form of heat. May play a role in the modulation of tissue respiratory control. Participates in thermogenesis and energy balance; Belongs to the mitochondrial carrier (TC …	4.61831	Homo sapiens	Other
ANGPTL4	Angiopoietin-related protein 4; Mediates inactivation of the lipoprotein lipase LPL, and thereby plays a role in the regulation of triglyceride clearance from the blood serum and in lipid metabolism. May also play a role in regulating glucose homeostasis and insulin sensitivity (Probable). Inhibits proliferation, migration, and tubule formation of endothelial cells and reduces vascular leakage. U…	2.8343	Homo sapiens	Other
PPARA	Peroxisome proliferator-activated receptor alpha; Ligand-activated transcription factor. Key regulator of lipid metabolism. Activated by the endogenous ligand 1-palmitoyl-2-oleoyl-sn- glycerol-3-phosphocholine (16:0/18:1-GPC). Activated by oleylethanolamide, a naturally occurring lipid that regulates satiety. Receptor for peroxisome proliferators such as hypolipidemic drugs and fatty acids. Regul…	3.68234	Homo sapiens	Nuclear Receptor
SLC2A4	Solute carrier family 2, facilitated glucose transporter member 4; Insulin-regulated facilitative glucose transporter, which plays a key role in removal of glucose from circulation. Response to insulin is regulated by its intracellular localization: in the absence of insulin, it is efficiently retained intracellularly within storage compartments in muscle and fat cells. Upon insulin stimulation, …	3.63087	Homo sapiens	Transporter
INS	Insulin A chain; Insulin decreases blood glucose concentration. It increases cell permeability to monosaccharides, amino acids and fatty acids. It accelerates glycolysis, the pentose phosphate cycle, and glycogen synthesis in liver.	4	Homo sapiens	Other
PPARGC1A	Peroxisome proliferator-activated receptor gamma coactivator 1-alpha; Transcriptional coactivator for steroid receptors and nuclear receptors. Greatly increases the transcriptional activity of PPARG and thyroid hormone receptor on the uncoupling protein promoter. Can regulate key mitochondrial genes that contribute to the program of adaptive thermogenesis. Plays an essential role in metabolic rep…	3.65673	Homo sapiens	Other
CD4	T-cell surface glycoprotein CD4; Integral membrane glycoprotein that plays an essential role in the immune response and serves multiple functions in responses against both external and internal offenses. In T-cells, functions primarily as a coreceptor for MHC class II molecule:peptide complex. The antigens presented by class II peptides are derived from extracellular proteins while class I peptid…	3.17401	Homo sapiens	Other
AGTR1	Type-1 angiotensin II receptor; Receptor for angiotensin II. Mediates its action by association with G proteins that activate a phosphatidylinositol- calcium second messenger system.	2.78419	Homo sapiens	GPCR
RPS6KB1	Ribosomal protein S6 kinase beta-1; Serine/threonine-protein kinase that acts downstream of mTOR signaling in response to growth factors and nutrients to promote cell proliferation, cell growth and cell cycle progression. Regulates protein synthesis through phosphorylation of EIF4B, RPS6 and EEF2K, and contributes to cell survival by repressing the pro-apoptotic function of BAD. Under conditions …	2.89946	Homo sapiens	Kinase
PRL	Prolactin; Prolactin acts primarily on the mammary gland by promoting lactation; Belongs to the somatotropin/prolactin family.	2.87877	Homo sapiens	Other
HCRT	Orexin-A; Neuropeptides that play a significant role in the regulation of food intake and sleep-wakefulness, possibly by coordinating the complex behavioral and physiologic responses of these complementary homeostatic functions. A broader role in the homeostatic regulation of energy metabolism, autonomic function, hormonal balance and the regulation of body fluids, is also suggested. Orexin-A bin…	3.06149	Homo sapiens	Other
SERPINE1	Plasminogen activator inhibitor 1; Serine protease inhibitor. Inhibits TMPRSS7. Is a primary inhibitor of tissue-type plasminogen activator (PLAT) and urokinase-type plasminogen activator (PLAU). As PLAT inhibitor, it is required for fibrinolysis down-regulation and is responsible for the controlled degradation of blood clots. As PLAU inhibitor, it is involved in the regulation of cell adhesion a…	3.34211	Homo sapiens	Other
MAPK8	Mitogen-activated protein kinase 8; Serine/threonine-protein kinase involved in various processes such as cell proliferation, differentiation, migration, transformation and programmed cell death. Extracellular stimuli such as proinflammatory cytokines or physical stress stimulate the stress- activated protein kinase/c-Jun N-terminal kinase (SAP/JNK) signaling pathway. In this cascade, two dual sp…	2.82124	Homo sapiens	Kinase
XBP1	X-box-binding protein 1, cytoplasmic form; Functions as a transcription factor during endoplasmic reticulum (ER) stress by regulating the unfolded protein response (UPR). Required for cardiac myogenesis and hepatogenesis during embryonic development, and the development of secretory tissues such as exocrine pancreas and salivary gland (By similarity). Involved in terminal differentiation of B lym…	2.75005	Homo sapiens	Transcription Factor
GSK3B	Glycogen synthase kinase-3 beta; Constitutively active protein kinase that acts as a negative regulator in the hormonal control of glucose homeostasis, Wnt signaling and regulation of transcription factors and microtubules, by phosphorylating and inactivating glycogen synthase (GYS1 or GYS2), EIF2B, CTNNB1/beta-catenin, APC, AXIN1, DPYSL2/CRMP2, JUN, NFATC1/NFATC, MAPT/TAU and MACF1. Requires pri…	2.82448	Homo sapiens	Kinase
GCG	Glicentin-related polypeptide; Glucagon plays a key role in glucose metabolism and homeostasis. Regulates blood glucose by increasing gluconeogenesis and decreasing glycolysis. A counterregulatory hormone of insulin, raises plasma glucose levels in response to insulin-induced hypoglycemia. Plays an important role in initiating and maintaining hyperglycemic conditions in diabetes. GLP-2 stimulates…	3.82802	Homo sapiens	Other
CEBPA	CCAAT/enhancer-binding protein alpha; Transcription factor that coordinates proliferation arrest and the differentiation of myeloid progenitors, adipocytes, hepatocytes, and cells of the lung and the placenta. Binds directly to the consensus DNA sequence 5'-T[TG]NNGNAA[TG]-3' acting as an activator on distinct target genes. During early embryogenesis, plays essential and redundant functions with …	3.06883	Homo sapiens	Transcription Factor
RETN	Resistin; Hormone that seems to suppress insulin ability to stimulate glucose uptake into adipose cells (By similarity). Potentially links obesity to diabetes (By similarity). Promotes chemotaxis in myeloid cells.	4.74623	Homo sapiens	Other
PLG	Plasmin heavy chain A, short form; Plasmin dissolves the fibrin of blood clots and acts as a proteolytic factor in a variety of other processes including embryonic development, tissue remodeling, tumor invasion, and inflammation. In ovulation, weakens the walls of the Graafian follicle. It activates the urokinase-type plasminogen activator, collagenases and several complement zymogens, such as C1…	2.77576	Homo sapiens	Enzyme
BDNF	Brain-derived neurotrophic factor; Important signaling molecule that activates signaling cascades downstream of NTRK2. During development, promotes the survival and differentiation of selected neuronal populations of the peripheral and central nervous systems. Participates in axonal growth, pathfinding and in the modulation of dendritic growth and morphology. Major regulator of synaptic transmiss…	3.72143	Homo sapiens	Other
FFAR3	Free fatty acid receptor 3; G protein-coupled receptor that is activated by a major product of dietary fiber digestion, the short chain fatty acids (SCFAs), and that plays a role in the regulation of whole-body energy homeostasis and in intestinal immunity. In omnivorous mammals, the short chain fatty acids acetate, propionate and butyrate are produced primarily by the gut microbiome that metabol…	2.90356	Homo sapiens	GPCR
PIK3CG	Phosphatidylinositol 4,5-bisphosphate 3-kinase catalytic subunit gamma isoform; Phosphoinositide-3-kinase (PI3K) that phosphorylates PtdIns(4,5)P2 (Phosphatidylinositol 4,5-bisphosphate) to generate phosphatidylinositol 3,4,5-trisphosphate (PIP3). PIP3 plays a key role by recruiting PH domain-containing proteins to the membrane, including AKT1 and PDPK1, activating signaling cascades involved in …	3.2263	Homo sapiens	Kinase
RETNLB	Resistin-like beta; Probable hormone; Belongs to the resistin/FIZZ family.	3.71076	Homo sapiens	Other
POMC	Corticotropin-like intermediary peptide; [Corticotropin]: Stimulates the adrenal glands to release cortisol. [Melanocyte-stimulating hormone beta]: Increases the pigmentation of skin by increasing melanin production in melanocytes. [Met-enkephalin]: Endogenous opiate; Belongs to the POMC family.	4.71099	Homo sapiens	Other
IAPP	Islet amyloid polypeptide; Selectively inhibits insulin-stimulated glucose utilization and glycogen deposition in muscle, while not affecting adipocyte glucose metabolism; Belongs to the calcitonin family.	2.9404	Homo sapiens	Other
APLN	Apelin-13; Endogenous ligand for the apelin receptor (APLNR). Drives internalization of the apelin receptor (By similarity). Apelin-36 dissociates more hardly than (pyroglu)apelin-13 from APLNR (By similarity). Hormone involved in the regulation of cardiac precursor cell movements during gastrulation and heart morphogenesis (By similarity). Has an inhibitory effect on cytokine production in respo…	2.90244	Homo sapiens	Other
REN	Renin; Renin is a highly specific endopeptidase, whose only known function is to generate angiotensin I from angiotensinogen in the plasma, initiating a cascade of reactions that produce an elevation of blood pressure and increased sodium retention by the kidney.	3.5092	Homo sapiens	Enzyme
CCK	Cholecystokinin-58 desnonopeptide; This peptide hormone induces gall bladder contraction and the release of pancreatic enzymes in the gut. Its function in the brain is not clear. Binding to CCK-A receptors stimulates amylase release from the pancreas, binding to CCK-B receptors stimulates gastric acid secretion.	2.96079	Homo sapiens	Other
OCLN	Occludin; May play a role in the formation and regulation of the tight junction (TJ) paracellular permeability barrier. It is able to induce adhesion when expressed in cells lacking tight junctions.	2.74546	Homo sapiens	Other
PIK3CD	Phosphatidylinositol 4,5-bisphosphate 3-kinase catalytic subunit delta isoform; Phosphoinositide-3-kinase (PI3K) that phosphorylates PtdIns(4,5)P2 (Phosphatidylinositol 4,5-bisphosphate) to generate phosphatidylinositol 3,4,5-trisphosphate (PIP3). PIP3 plays a key role by recruiting PH domain-containing proteins to the membrane, including AKT1 and PDPK1, activating signaling cascades involved in …	3.21847	Homo sapiens	Kinase
CREB1	Cyclic AMP-responsive element-binding protein 1; Phosphorylation-dependent transcription factor that stimulates transcription upon binding to the DNA cAMP response element (CRE), a sequence present in many viral and cellular promoters. Transcription activation is enhanced by the TORC coactivators which act independently of Ser-133 phosphorylation. Involved in different cellular processes includin…	2.91606	Homo sapiens	Transcription Factor
FFAR2	Free fatty acid receptor 2; G protein-coupled receptor that is activated by a major product of dietary fiber digestion, the short chain fatty acids (SCFAs), and that plays a role in the regulation of whole-body energy homeostasis and in intestinal immunity. In omnivorous mammals, the short chain fatty acids acetate, propionate and butyrate are produced primarily by the gut microbiome that metabol…	3.03776	Homo sapiens	GPCR
IGF1	Insulin-like growth factor I; The insulin-like growth factors, isolated from plasma, are structurally and functionally related to insulin but have a much higher growth-promoting activity. May be a physiological regulator of [1-14C]- 2-deoxy-D-glucose (2DG) transport and glycogen synthesis in osteoblasts. Stimulates glucose transport in bone-derived osteoblastic (PyMS) cells and is effective at mu…	3.59021	Homo sapiens	Other
HMOX1	Heme oxygenase 1; Heme oxygenase cleaves the heme ring at the alpha methene bridge to form biliverdin. Biliverdin is subsequently converted to bilirubin by biliverdin reductase. Under physiological conditions, the activity of heme oxygenase is highest in the spleen, where senescent erythrocytes are sequestrated and destroyed. Exhibits cytoprotective effects since excess of free heme sensitizes ce…	2.92817	Homo sapiens	Enzyme
IKBKB	Inhibitor of nuclear factor kappa-B kinase subunit beta; Serine kinase that plays an essential role in the NF-kappa-B signaling pathway which is activated by multiple stimuli such as inflammatory cytokines, bacterial or viral products, DNA damages or other cellular stresses. Acts as part of the canonical IKK complex in the conventional pathway of NF-kappa-B activation. Phosphorylates inhibitors o…	2.86338	Homo sapiens	Kinase
AGT	Angiotensin 1-4; Essential component of the renin-angiotensin system (RAS), a potent regulator of blood pressure, body fluid and electrolyte homeostasis. [Angiotensin-3]: stimulates aldosterone release.	3.39558	Homo sapiens	Other
LDLR	Low-density lipoprotein receptor; Binds LDL, the major cholesterol-carrying lipoprotein of plasma, and transports it into cells by endocytosis. In order to be internalized, the receptor-ligand complexes must first cluster into clathrin-coated pits. (Microbial infection) Acts as a receptor for Vesicular stomatitis virus; Belongs to the LDLR family.	3.0769	Homo sapiens	Other
GPT2	Alanine aminotransferase 2; Catalyzes the reversible transamination between alanine and 2-oxoglutarate to form pyruvate and glutamate. Belongs to the class-I pyridoxal-phosphate-dependent aminotransferase family. Alanine aminotransferase subfamily.	2.90342	Homo sapiens	Enzyme
ESR1	Estrogen receptor; Nuclear hormone receptor. The steroid hormones and their receptors are involved in the regulation of eukaryotic gene expression and affect cellular proliferation and differentiation in target tissues. Ligand-dependent nuclear transactivation involves either direct homodimer binding to a palindromic estrogen response element (ERE) sequence or association with other DNA-binding t…	3.1564	Homo sapiens	Nuclear Receptor
ATP12A	Potassium-transporting ATPase alpha chain 2; Catalyzes the hydrolysis of ATP coupled with the exchange of H(+) and K(+) ions across the plasma membrane. Responsible for potassium absorption in various tissues; Belongs to the cation transport ATPase (P-type) (TC 3.A.3) family. Type IIC subfamily.	2.7893	Homo sapiens	Transporter
ATP4A	Potassium-transporting ATPase alpha chain 1; Catalyzes the hydrolysis of ATP coupled with the exchange of H(+) and K(+) ions across the plasma membrane. Responsible for acid production in the stomach.	2.7895	Homo sapiens	Transporter
LCN2	Neutrophil gelatinase-associated lipocalin; Iron-trafficking protein involved in multiple processes such as apoptosis, innate immunity and renal development. Binds iron through association with 2,5-dihydroxybenzoic acid (2,5-DHBA), a siderophore that shares structural similarities with bacterial enterobactin, and delivers or removes iron from the cell, depending on the context. Iron-bound form (h…	2.76956	Homo sapiens	Enzyme
NR3C1	Glucocorticoid receptor; Receptor for glucocorticoids (GC). Has a dual mode of action: as a transcription factor that binds to glucocorticoid response elements (GRE), both for nuclear and mitochondrial DNA, and as a modulator of other transcription factors. Affects inflammatory responses, cellular proliferation and differentiation in target tissues. Involved in chromatin remodeling. Plays a role …	2.81497	Homo sapiens	Nuclear Receptor
ACE	Angiotensin-converting enzyme, soluble form; Converts angiotensin I to angiotensin II by release of the terminal His-Leu, this results in an increase of the vasoconstrictor activity of angiotensin. Also able to inactivate bradykinin, a potent vasodilator. Has also a glycosidase activity which releases GPI- anchored proteins from the membrane by cleaving the mannose linkage in the GPI moiety; Belo…	3.45056	Homo sapiens	Enzyme
PTEN	Phosphatase and tensin homolog; Tumor suppressor. Acts as a dual-specificity protein phosphatase, dephosphorylating tyrosine-, serine- and threonine- phosphorylated proteins. Also acts as a lipid phosphatase, removing the phosphate in the D3 position of the inositol ring from phosphatidylinositol 3,4,5-trisphosphate, phosphatidylinositol 3,4- diphosphate, phosphatidylinositol 3-phosphate and inos…	2.79949	Homo sapiens	Enzyme
PTGS2	Prostaglandin G/H synthase 2; Converts arachidonate to prostaglandin H2 (PGH2), a committed step in prostanoid synthesis. Constitutively expressed in some tissues in physiological conditions, such as the endothelium, kidney and brain, and in pathological conditions, such as in cancer. PTGS2 is responsible for production of inflammatory prostaglandins. Up-regulation of PTGS2 is also associated wit…	3.00068	Homo sapiens	Enzyme
MAF	Transcription factor Maf; Acts as a transcriptional activator or repressor. Involved in embryonic lens fiber cell development. Recruits the transcriptional coactivators CREBBP and/or EP300 to crystallin promoters leading to up- regulation of crystallin gene during lens fiber cell differentiation. Activates the expression of IL4 in T helper 2 (Th2) cells. Increases T- cell susceptibility to apopto…	2.82774	Homo sapiens	Transcription Factor
JUN	Transcription factor AP-1; Transcription factor that recognizes and binds to the enhancer heptamer motif 5'-TGA[CG]TCA-3'. Promotes activity of NR5A1 when phosphorylated by HIPK3 leading to increased steroidogenic gene expression upon cAMP signaling pathway stimulation. Involved in activated KRAS-mediated transcriptional activation of USP28 in colorectal cancer (CRC) cells. Binds to the USP28 pro…	3.09516	Homo sapiens	Transcription Factor
JAK2	Tyrosine-protein kinase JAK2; Non-receptor tyrosine kinase involved in various processes such as cell growth, development, differentiation or histone modifications. Mediates essential signaling events in both innate and adaptive immunity. In the cytoplasm, plays a pivotal role in signal transduction via its association with type I receptors such as growth hormone (GHR), prolactin (PRLR), leptin (…	2.79476	Homo sapiens	Kinase
NLRP3	NACHT, LRR and PYD domains-containing protein 3; As the sensor component of the NLRP3 inflammasome, plays a crucial role in innate immunity and inflammation. In response to pathogens and other damage-associated signals, initiates the formation of the inflammasome polymeric complex, made of NLRP3, PYCARD and CASP1 (and possibly CASP4 and CASP5). Recruitment of proCASP1 to the inflammasome promotes…	2.93386	Homo sapiens	Other
FOS	Proto-oncogene c-Fos; Nuclear phosphoprotein which forms a tight but non-covalently linked complex with the JUN/AP-1 transcription factor. In the heterodimer, FOS and JUN/AP-1 basic regions each seems to interact with symmetrical DNA half sites. On TGF-beta activation, forms a multimeric SMAD3/SMAD4/JUN/FOS complex at the AP1/SMAD-binding site to regulate TGF-beta-mediated signaling. Has a critic…	2.89979	Homo sapiens	Transcription Factor
APOB	Apolipoprotein B-100; Apolipoprotein B is a major protein constituent of chylomicrons (apo B-48), LDL (apo B-100) and VLDL (apo B-100). Apo B- 100 functions as a recognition signal for the cellular binding and internalization of LDL particles by the apoB/E receptor.	3.43463	Homo sapiens	Other
CTNNB1	Catenin beta-1; Key downstream component of the canonical Wnt signaling pathway. In the absence of Wnt, forms a complex with AXIN1, AXIN2, APC, CSNK1A1 and GSK3B that promotes phosphorylation on N-terminal Ser and Thr residues and ubiquitination of CTNNB1 via BTRC and its subsequent degradation by the proteasome. In the presence of Wnt ligand, CTNNB1 is not ubiquitinated and accumulates in the nu…	2.98272	Homo sapiens	Other
MMP9	67 kDa matrix metalloproteinase-9; May play an essential role in local proteolysis of the extracellular matrix and in leukocyte migration. Could play a role in bone osteoclastic resorption. Cleaves KiSS1 at a Gly-|-Leu bond. Cleaves type IV and type V collagen into large C-terminal three quarter fragments and shorter N-terminal one quarter fragments. Degrades fibronectin but not laminin or Pz-pep…	2.92917	Homo sapiens	Enzyme
APOE	Apolipoprotein E; APOE is an apolipoprotein, a protein associating with lipid particles, that mainly functions in lipoprotein-mediated lipid transport between organs via the plasma and interstitial fluids. APOE is a core component of plasma lipoproteins and is involved in their production, conversion and clearance. Apoliproteins are amphipathic molecules that interact both with lipids of the lipo…	3.35077	Homo sapiens	Other
TP53	Cellular tumor antigen p53; Acts as a tumor suppressor in many tumor types; induces growth arrest or apoptosis depending on the physiological circumstances and cell type. Involved in cell cycle regulation as a trans-activator that acts to negatively regulate cell division by controlling a set of genes required for this process. One of the activated genes is an inhibitor of cyclin-dependent kinase…	3.04551	Homo sapiens	Transcription Factor
MAPK3	Mitogen-activated protein kinase 3; Serine/threonine kinase which acts as an essential component of the MAP kinase signal transduction pathway. MAPK1/ERK2 and MAPK3/ERK1 are the 2 MAPKs which play an important role in the MAPK/ERK cascade. They participate also in a signaling cascade initiated by activated KIT and KITLG/SCF. Depending on the cellular context, the MAPK/ERK cascade mediates diverse…	2.96146	Homo sapiens	Kinase
SOCS3	Suppressor of cytokine signaling 3; SOCS family proteins form part of a classical negative feedback system that regulates cytokine signal transduction. SOCS3 is involved in negative regulation of cytokines that signal through the JAK/STAT pathway. Inhibits cytokine signal transduction by binding to tyrosine kinase receptors including gp130, LIF, erythropoietin, insulin, IL12, GCSF and leptin rece…	2.97472	Homo sapiens	Other
CASP1	Caspase-1 subunit p10; Thiol protease that cleaves IL-1 beta between an Asp and an Ala, releasing the mature cytokine which is involved in a variety of inflammatory processes. Important for defense against pathogens. Cleaves and activates sterol regulatory element binding proteins (SREBPs). Can also promote apoptosis. Upon inflammasome activation, during DNA virus infection but not RNA virus chal…	2.89466	Homo sapiens	Enzyme
GPT	Alanine aminotransferase 1; Catalyzes the reversible transamination between alanine and 2-oxoglutarate to form pyruvate and glutamate. Participates in cellular nitrogen metabolism and also in liver gluconeogenesis starting with precursors transported from skeletal muscles (By similarity). Belongs to the class-I pyridoxal-phosphate-dependent aminotransferase family. Alanine aminotransferase subfam…	3.5349	Homo sapiens	Enzyme
VCAM1	Vascular cell adhesion protein 1; Important in cell-cell recognition. Appears to function in leukocyte-endothelial cell adhesion. Interacts with integrin alpha- 4/beta-1 (ITGA4/ITGB1) on leukocytes, and mediates both adhesion and signal transduction. The VCAM1/ITGA4/ITGB1 interaction may play a pathophysiologic role both in immune responses and in leukocyte emigration to sites of inflammation.	3.00955	Homo sapiens	Other
PXDN	Peroxidasin homolog; Displays low peroxidase activity and is likely to participate in H(2)O(2) metabolism and peroxidative reactions in the cardiovascular system. Plays a role in extracellular matrix formation.	3.0532	Homo sapiens	Other
PXDNL	Peroxidasin-like protein; [Isoform PMR1]: Endonuclease selectively degrading some target mRNAs while they are engaged by translating ribosomes, among which albumin and beta-globin mRNAs.	3.05124	Homo sapiens	Other
SELE	E-selectin; Cell-surface glycoprotein having a role in immunoadhesion. Mediates in the adhesion of blood neutrophils in cytokine-activated endothelium through interaction with SELPLG/PSGL1. May have a role in capillary morphogenesis; Belongs to the selectin/LECAM family.	2.77725	Homo sapiens	Other
MRC1	Macrophage mannose receptor 1; Mediates the endocytosis of glycoproteins by macrophages. Binds both sulfated and non-sulfated polysaccharide chains. (Microbial infection) Acts as a receptor for Dengue virus envelope protein E.	2.75381	Homo sapiens	Other
CASP3	Caspase-3 subunit p12; Involved in the activation cascade of caspases responsible for apoptosis execution. At the onset of apoptosis it proteolytically cleaves poly(ADP-ribose) polymerase (PARP) at a '216-Asp-|-Gly-217' bond. Cleaves and activates sterol regulatory element binding proteins (SREBPs) between the basic helix-loop-helix leucine zipper domain and the membrane attachment domain. Cleave…	2.93743	Homo sapiens	Enzyme
DPP4	Dipeptidyl peptidase 4 membrane form; Cell surface glycoprotein receptor involved in the costimulatory signal essential for T-cell receptor (TCR)-mediated T- cell activation. Acts as a positive regulator of T-cell coactivation, by binding at least ADA, CAV1, IGF2R, and PTPRC. Its binding to CAV1 and CARD11 induces T-cell proliferation and NF-kappa-B activation in a T-cell receptor/CD3-dependent m…	3.28885	Homo sapiens	Enzyme
ACE2	Processed angiotensin-converting enzyme 2; Carboxypeptidase which converts angiotensin I to angiotensin 1-9, a peptide of unknown function, and angiotensin II to angiotensin 1-7, a vasodilator. Also able to hydrolyze apelin-13 and dynorphin-13 with high efficiency. By cleavage of angiotensin II, may be an important regulator of heart function. By cleavage of angiotensin II, may also have a protec…	3.20848	Homo sapiens	Enzyme
CRP	C-reactive protein(1-205); Displays several functions associated with host defense: it promotes agglutination, bacterial capsular swelling, phagocytosis and complement fixation through its calcium-dependent binding to phosphorylcholine. Can interact with DNA and histones and may scavenge nuclear material released from damaged circulating cells.	3.87085	Homo sapiens	Other
TLR2	Toll-like receptor 2; Cooperates with LY96 to mediate the innate immune response to bacterial lipoproteins and other microbial cell wall components. Cooperates with TLR1 or TLR6 to mediate the innate immune response to bacterial lipoproteins or lipopeptides. Acts via MYD88 and TRAF6, leading to NF-kappa-B activation, cytokine secretion and the inflammatory response. May also activate immune cells…	2.93395	Homo sapiens	Other
ALB	Serum albumin; Serum albumin, the main protein of plasma, has a good binding capacity for water, Ca(2+), Na(+), K(+), fatty acids, hormones, bilirubin and drugs (Probable). Its main function is the regulation of the colloidal osmotic pressure of blood (Probable). Major zinc transporter in plasma, typically binds about 80% of all plasma zinc. Major calcium and magnesium transporter in plasma, bind…	3.6018	Homo sapiens	Other
BCL2	Apoptosis regulator Bcl-2; Suppresses apoptosis in a variety of cell systems including factor-dependent lymphohematopoietic and neural cells. Regulates cell death by controlling the mitochondrial membrane permeability. Appears to function in a feedback loop system with caspases. Inhibits caspase activity either by preventing the release of cytochrome c from the mitochondria and/or by binding to t…	2.85885	Homo sapiens	Other
CCL2	C-C motif chemokine 2; Acts as a ligand for C-C chemokine receptor CCR2. Signals through binding and activation of CCR2 and induces a strong chemotactic response and mobilization of intracellular calcium ions. Exhibits a chemotactic activity for monocytes and basophils but not neutrophils or eosinophils. May be involved in the recruitment of monocytes into the arterial wall during the disease pro…	3.54268	Homo sapiens	Other
CXCL10	C-X-C motif chemokine 10; Pro-inflammatory cytokine that is involved in a wide variety of processes such as chemotaxis, differentiation, and activation of peripheral immune cells, regulation of cell growth, apoptosis and modulation of angiostatic effects. Plays thereby an important role during viral infections by stimulating the activation and migration of immune cells to the infected sites (By s…	2.74364	Homo sapiens	Other
IL18	Interleukin-18; A proinflammatory cytokine primarily involved in polarized T- helper 1 (Th1) cell and natural killer (NK) cell immune responses (Probable). Upon binding to IL18R1 and IL18RAP, forms a signaling ternary complex which activates NF-kappa-B, triggering synthesis of inflammatory mediators. Synergizes with IL12/interleukin-12 to induce IFNG synthesis from T-helper 1 (Th1) cells and natu…	3.14572	Homo sapiens	Other
MYD88	Myeloid differentiation primary response protein MyD88; Adapter protein involved in the Toll-like receptor and IL-1 receptor signaling pathway in the innate immune response. Acts via IRAK1, IRAK2, IRF7 and TRAF6, leading to NF-kappa-B activation, cytokine secretion and the inflammatory response. Increases IL-8 transcription. Involved in IL-18-mediated signaling pathway. Activates IRF1 resulting i…	2.79234	Homo sapiens	Other
NFKB1	Nuclear factor NF-kappa-B p105 subunit; NF-kappa-B is a pleiotropic transcription factor present in almost all cell types and is the endpoint of a series of signal transduction events that are initiated by a vast array of stimuli related to many biological processes such as inflammation, immunity, differentiation, cell growth, tumorigenesis and apoptosis. NF-kappa-B is a homo- or heterodimeric co…	3.1144	Homo sapiens	Transcription Factor
CXCL8	Interleukin-8; IL-8 is a chemotactic factor that attracts neutrophils, basophils, and T-cells, but not monocytes. It is also involved in neutrophil activation. It is released from several cell types in response to an inflammatory stimulus. IL-8(6-77) has a 5-10-fold higher activity on neutrophil activation, IL-8(5-77) has increased activity on neutrophil activation and IL-8(7-77) has a higher aff…	3.23621	Homo sapiens	Other
TGFB1	Transforming growth factor beta-1 proprotein; Transforming growth factor beta-1 proprotein: Precursor of the Latency-associated peptide (LAP) and Transforming growth factor beta-1 (TGF-beta-1) chains, which constitute the regulatory and active subunit of TGF-beta-1, respectively. Transforming growth factor beta-1: Multifunctional protein that regulates the growth and differentiation of various ce…	3.33635	Homo sapiens	Other
IL1A	Interleukin-1 alpha; Produced by activated macrophages, IL-1 stimulates thymocyte proliferation by inducing IL-2 release, B-cell maturation and proliferation, and fibroblast growth factor activity. IL-1 proteins are involved in the inflammatory response, being identified as endogenous pyrogens, and are reported to stimulate the release of prostaglandin and collagenase from synovial cells.	3.25163	Homo sapiens	Other
CCL5	C-C motif chemokine 5; Chemoattractant for blood monocytes, memory T-helper cells and eosinophils. Causes the release of histamine from basophils and activates eosinophils. May activate several chemokine receptors including CCR1, CCR3, CCR4 and CCR5. One of the major HIV-suppressive factors produced by CD8+ T-cells. Recombinant RANTES protein induces a dose-dependent inhibition of different strai…	2.80224	Homo sapiens	Other
STAT3	Signal transducer and activator of transcription 3; Signal transducer and transcription activator that mediates cellular responses to interleukins, KITLG/SCF, LEP and other growth factors. Once activated, recruits coactivators, such as NCOA1 or MED1, to the promoter region of the target gene. May mediate cellular responses to activated FGFR1, FGFR2, FGFR3 and FGFR4. Binds to the interleukin-6 (IL…	3.22746	Homo sapiens	Transcription Factor
CD68	Macrosialin; Could play a role in phagocytic activities of tissue macrophages, both in intracellular lysosomal metabolism and extracellular cell-cell and cell-pathogen interactions. Binds to tissue- and organ-specific lectins or selectins, allowing homing of macrophage subsets to particular sites. Rapid recirculation of CD68 from endosomes and lysosomes to the plasma membrane may allow macrophage…	2.84028	Homo sapiens	Other
TLR4	Toll-like receptor 4; Cooperates with LY96 and CD14 to mediate the innate immune response to bacterial lipopolysaccharide (LPS). Acts via MYD88, TIRAP and TRAF6, leading to NF-kappa-B activation, cytokine secretion and the inflammatory response. Also involved in LPS-independent inflammatory responses triggered by free fatty acids, such as palmitate, and Ni(2+). Responses triggered by Ni(2+) requi…	3.40766	Homo sapiens	Other
CCR2	C-C chemokine receptor type 2; Key functional receptor for CCL2 but can also bind CCL7 and CCL12. Its binding with CCL2 on monocytes and macrophages mediates chemotaxis and migration induction through the activation of the PI3K cascade, the small G protein Rac and lamellipodium protrusion (Probable). Also acts as a receptor for the beta-defensin DEFB106A/DEFB106B. Regulates the expression of T-ce…	2.80387	Homo sapiens	GPCR
FN1	Fibronectin; Fibronectins bind cell surfaces and various compounds including collagen, fibrin, heparin, DNA, and actin. Fibronectins are involved in cell adhesion, cell motility, opsonization, wound healing, and maintenance of cell shape. Involved in osteoblast compaction through the fibronectin fibrillogenesis cell-mediated matrix assembly process, essential for osteoblast mineralization. Partic…	2.75468	Homo sapiens	Other
IL5	Interleukin-5; Factor that induces terminal differentiation of late- developing B-cells to immunoglobulin secreting cells; Belongs to the IL-5 family.	2.76861	Homo sapiens	Other
IL13	Interleukin-13; Cytokine. Inhibits inflammatory cytokine production. Synergizes with IL2 in regulating interferon-gamma synthesis. May be critical in regulating inflammatory and immune responses. Positively regulates IL31RA expression in macrophages (By similarity).	2.94514	Homo sapiens	Other
CD19	B-lymphocyte antigen CD19; Functions as coreceptor for the B-cell antigen receptor complex (BCR) on B-lymphocytes. Decreases the threshold for activation of downstream signaling pathways and for triggering B-cell responses to antigens. Activates signaling pathways that lead to the activation of phosphatidylinositol 3-kinase and the mobilization of intracellular Ca(2+) stores. Is not required for …	2.9043	Homo sapiens	Other
ITGAM	Integrin alpha-M; Integrin ITGAM/ITGB2 is implicated in various adhesive interactions of monocytes, macrophages and granulocytes as well as in mediating the uptake of complement-coated particles and pathogens. It is identical with CR-3, the receptor for the iC3b fragment of the third complement component. It probably recognizes the R-G-D peptide in C3b. Integrin ITGAM/ITGB2 is also a receptor for…	2.82045	Homo sapiens	Other
ITGAX	Integrin alpha-X; Integrin alpha-X/beta-2 is a receptor for fibrinogen. It recognizes the sequence G-P-R in fibrinogen. It mediates cell-cell interaction during inflammatory responses. It is especially important in monocyte adhesion and chemotaxis.	2.85466	Homo sapiens	Other
IL1B	Interleukin-1 beta; Potent proinflammatory cytokine. Initially discovered as the major endogenous pyrogen, induces prostaglandin synthesis, neutrophil influx and activation, T-cell activation and cytokine production, B- cell activation and antibody production, and fibroblast proliferation and collagen production. Promotes Th17 differentiation of T-cells. Synergizes with IL12/interleukin-12 to ind…	3.77724	Homo sapiens	Other
IL6	Interleukin-6; Cytokine with a wide variety of biological functions. It is a potent inducer of the acute phase response. Plays an essential role in the final differentiation of B-cells into Ig-secreting cells Involved in lymphocyte and monocyte differentiation. Acts on B-cells, T-cells, hepatocytes, hematopoietic progenitor cells and cells of the CNS. Required for the generation of T(H)17 cells. …	4	Homo sapiens	Other
TNF	Tumor necrosis factor, membrane form; Cytokine that binds to TNFRSF1A/TNFR1 and TNFRSF1B/TNFBR. It is mainly secreted by macrophages and can induce cell death of certain tumor cell lines. It is potent pyrogen causing fever by direct action or by stimulation of interleukin-1 secretion and is implicated in the induction of cachexia, Under certain conditions it can stimulate cell proliferation and i…	3.86309	Homo sapiens	Other
ICAM1	Intercellular adhesion molecule 1; ICAM proteins are ligands for the leukocyte adhesion protein LFA-1 (integrin alpha-L/beta-2). During leukocyte trans-endothelial migration, ICAM1 engagement promotes the assembly of endothelial apical cups through ARHGEF26/SGEF and RHOG activation. (Microbial infection) Acts as a receptor for Coxsackievirus A21 capsid proteins.	3.01821	Homo sapiens	Other
IL4	Interleukin-4; Participates in at least several B-cell activation processes as well as of other cell types. It is a costimulator of DNA-synthesis. It induces the expression of class II MHC molecules on resting B-cells. It enhances both secretion and cell surface expression of IgE and IgG1. It also regulates the expression of the low affinity Fc receptor for IgE (CD23) on both lymphocytes and mono…	3.12997	Homo sapiens	Other
IL17A	Interleukin-17A; Ligand for IL17RA and IL17RC. The heterodimer formed by IL17A and IL17F is a ligand for the heterodimeric complex formed by IL17RA and IL17RC. Involved in inducing stromal cells to produce proinflammatory and hematopoietic cytokines ; Belongs to the IL-17 family.	3.15135	Homo sapiens	Other
IL2	Interleukin-2; Produced by T-cells in response to antigenic or mitogenic stimulation, this protein is required for T-cell proliferation and other activities crucial to regulation of the immune response. Can stimulate B-cells, monocytes, lymphokine-activated killer cells, natural killer cells, and glioma cells.	2.90008	Homo sapiens	Other
IL10	Interleukin-10; Major immune regulatory cytokine that acts on many cells of the immune system where it has profound anti-inflammatory functions, limiting excessive tissue disruption caused by inflammation. Mechanistically, IL10 binds to its heterotetrameric receptor comprising IL10RA and IL10RB leading to JAK1 and STAT2-mediated phosphorylation of STAT3. In turn, STAT3 translocates to the nucleus…	3.46145	Homo sapiens	Other
PTPRC	Receptor-type tyrosine-protein phosphatase C; Protein tyrosine-protein phosphatase required for T-cell activation through the antigen receptor. Acts as a positive regulator of T-cell coactivation upon binding to DPP4. The first PTPase domain has enzymatic activity, while the second one seems to affect the substrate specificity of the first one. Upon T-cell activation, recruits and dephosphorylate…	2.73567	Homo sapiens	Enzyme
IFNG	Interferon gamma; Produced by lymphocytes activated by specific antigens or mitogens. IFN-gamma, in addition to having antiviral activity, has important immunoregulatory functions. It is a potent activator of macrophages, it has antiproliferative effects on transformed cells and it can potentiate the antiviral and antitumor effects of the type I interferons; Belongs to the type II (or gamma) inte…	3.30734	Homo sapiens	Other
CD8A	T-cell surface glycoprotein CD8 alpha chain; Integral membrane glycoprotein that plays an essential role in the immune response and serves multiple functions in responses against both external and internal offenses. In T-cells, functions primarily as a coreceptor for MHC class I molecule:peptide complex. The antigens presented by class I peptides are derived from cytosolic proteins while class II…	3.06849	Homo sapiens	Other
CETP	Cholesteryl ester transfer protein; Involved in the transfer of neutral lipids, including cholesteryl ester and triglyceride, among lipoprotein particles. Allows the net movement of cholesteryl ester from high density lipoproteins/HDL to triglyceride-rich very low density lipoproteins/VLDL, and the equimolar transport of triglyceride from VLDL to HDL. Regulates the reverse cholesterol transport, …	2.79318	Homo sapiens	Other
MLXIPL	Carbohydrate-responsive element-binding protein; Transcriptional repressor. Binds to the canonical and non- canonical E box sequences 5'-CACGTG-3' (By similarity).	3.02513	Homo sapiens	Transcription Factor
NR1H4	Bile acid receptor; Ligand-activated transcription factor. Receptor for bile acids (BAs) such as chenodeoxycholic acid (CDCA), lithocholic acid, deoxycholic acid (DCA) and allocholic acid (ACA). Plays a essential role in BA homeostasis through the regulation of genes involved in BA synthesis, conjugation and enterohepatic circulation. Also regulates lipid and glucose homeostasis and is involved i…	3.22399	Homo sapiens	Nuclear Receptor
SREBF2	Processed sterol regulatory element-binding protein 2; Transcriptional activator required for lipid homeostasis. Regulates transcription of the LDL receptor gene as well as the cholesterol and to a lesser degree the fatty acid synthesis pathway (By similarity). Binds the sterol regulatory element 1 (SRE-1) (5'- ATCACCCCAC-3') found in the flanking region of the LDRL and HMG-CoA synthase genes.	2.92566	Homo sapiens	Transcription Factor
XPR1	Xenotropic and polytropic retrovirus receptor 1; Plays a role in phosphate homeostasis. Mediates phosphate export from the cell. Binds inositol hexakisphosphate (Ins6P) and similar inositol polyphosphates, such as 5-diphospho-inositol pentakisphosphate (5-InsP7); these are important intracellular signaling molecules.	2.82386	Homo sapiens	Other
CYP7A1	Cytochrome P450 7A1; A cytochrome P450 monooxygenase involved in the metabolism of endogenous cholesterol and its oxygenated derivatives (oxysterols). Mechanistically, uses molecular oxygen inserting one oxygen atom into a substrate, and reducing the second into a water molecule, with two electrons provided by NADPH via cytochrome P450 reductase (CPR; NADPH-ferrihemoprotein reductase). Functions …	2.92856	Homo sapiens	Enzyme
HMGCR	3-hydroxy-3-methylglutaryl-coenzyme A reductase; Transmembrane glycoprotein that is the rate-limiting enzyme in cholesterol biosynthesis as well as in the biosynthesis of nonsterol isoprenoids that are essential for normal cell function including ubiquinone and geranylgeranyl proteins.	3.03796	Homo sapiens	Enzyme
LIPC	Hepatic triacylglycerol lipase; Hepatic lipase has the capacity to catalyze hydrolysis of phospholipids, mono-, di-, and triglycerides, and acyl-CoA thioesters. It is an important enzyme in HDL metabolism. Hepatic lipase binds heparin.	2.74838	Homo sapiens	Enzyme
APOC3	Apolipoprotein C-III; Component of triglyceride-rich very low density lipoproteins (VLDL) and high density lipoproteins (HDL) in plasma. Plays a multifaceted role in triglyceride homeostasis. Intracellularly, promotes hepatic very low density lipoprotein 1 (VLDL1) assembly and secretion; extracellularly, attenuates hydrolysis and clearance of triglyceride- rich lipoproteins (TRLs). Impairs the li…	2.78976	Homo sapiens	Other
APOA1	Truncated apolipoprotein A-I; Participates in the reverse transport of cholesterol from tissues to the liver for excretion by promoting cholesterol efflux from tissues and by acting as a cofactor for the lecithin cholesterol acyltransferase (LCAT). As part of the SPAP complex, activates spermatozoa motility.	3.18499	Homo sapiens	Other
LEPR	Leptin receptor; Receptor for hormone LEP/leptin (Probable). On ligand binding, mediates LEP central and peripheral effects through the activation of different signaling pathways such as JAK2/STAT3 and MAPK cascade/FOS. In the hypothalamus, LEP acts as an appetite- regulating factor that induces a decrease in food intake and an increase in energy consumption by inducing anorexinogenic factors and…	4.80833	Homo sapiens	Other
ERN1	Serine/threonine-protein kinase/endoribonuclease IRE1; Serine/threonine-protein kinase and endoribonuclease that acts as a key sensor for the endoplasmic reticulum unfolded protein response (UPR). In unstressed cells, the endoplasmic reticulum luminal domain is maintained in its inactive monomeric state by binding to the endoplasmic reticulum chaperone HSPA5/BiP. Accumulation of misfolded protein…	2.75615	Homo sapiens	Kinase
GLP1R	Glucagon-like peptide 1 receptor; G-protein coupled receptor for glucagon-like peptide 1 (GLP- 1). Ligand binding triggers activation of a signaling cascade that leads to the activation of adenylyl cyclase and increased intracellular cAMP levels. Plays a role in regulating insulin secretion in response to GLP-1 (By similarity).	3.54322	Homo sapiens	GPCR
PIK3C3	Phosphatidylinositol 3-kinase catalytic subunit type 3; Catalytic subunit of the PI3K complex that mediates formation of phosphatidylinositol 3-phosphate; different complex forms are believed to play a role in multiple membrane trafficking pathways: PI3KC3-C1 is involved in initiation of autophagosomes and PI3KC3-C2 in maturation of autophagosomes and endocytosis. Involved in regulation of degrad…	2.93954	Homo sapiens	Kinase
EDN1	Big endothelin-1; Endothelins are endothelium-derived vasoconstrictor peptides (By similarity). Probable ligand for G-protein coupled receptors EDNRA and EDNRB which activates PTK2B, BCAR1, BCAR3 and, GTPases RAP1 and RHOA cascade in glomerular mesangial cells. Belongs to the endothelin/sarafotoxin family.	2.92655	Homo sapiens	Other
AGRP	Agouti-related protein; Plays a role in weight homeostasis. Involved in the control of feeding behavior through the central melanocortin system. Acts as alpha melanocyte-stimulating hormone antagonist by inhibiting cAMP production mediated by stimulation of melanocortin receptors within the hypothalamus and adrenal gland. Has very low activity with MC5R (By similarity). Is an inverse agonist for …	4.70907	Homo sapiens	Other
SLC5A2	Sodium/glucose cotransporter 2; Sodium-dependent glucose transporter. Has a Na(+) to glucose coupling ratio of 1:1.	3.1442	Homo sapiens	Transporter
NPY	C-flanking peptide of NPY; NPY is implicated in the control of feeding and in secretion of gonadotrophin-release hormone; Belongs to the NPY family.	3.5573	Homo sapiens	Other
PTPN1	Tyrosine-protein phosphatase non-receptor type 1; Tyrosine-protein phosphatase which acts as a regulator of endoplasmic reticulum unfolded protein response. Mediates dephosphorylation of EIF2AK3/PERK; inactivating the protein kinase activity of EIF2AK3/PERK. May play an important role in CKII- and p60c- src-induced signal transduction cascades. May regulate the EFNA5-EPHA3 signaling pathway which…	3.11476	Homo sapiens	Enzyme
INSR	Insulin receptor subunit alpha; Receptor tyrosine kinase which mediates the pleiotropic actions of insulin. Binding of insulin leads to phosphorylation of several intracellular substrates, including, insulin receptor substrates (IRS1, 2, 3, 4), SHC, GAB1, CBL and other signaling intermediates. Each of these phosphorylated proteins serve as docking proteins for other signaling proteins that contai…	3.61645	Homo sapiens	Kinase
GHRL	Appetite-regulating hormone; Ghrelin is the ligand for growth hormone secretagogue receptor type 1 (GHSR). Induces the release of growth hormone from the pituitary. Has an appetite-stimulating effect, induces adiposity and stimulates gastric acid secretion. Involved in growth regulation.	3.82184	Homo sapiens	Other
XDH	Xanthine dehydrogenase/oxidase; Key enzyme in purine degradation. Catalyzes the oxidation of hypoxanthine to xanthine. Catalyzes the oxidation of xanthine to uric acid. Contributes to the generation of reactive oxygen species. Has also low oxidase activity towards aldehydes (in vitro).	2.77962	Homo sapiens	Enzyme
PIK3CA	Phosphatidylinositol 4,5-bisphosphate 3-kinase catalytic subunit alpha isoform; Phosphoinositide-3-kinase (PI3K) that phosphorylates PtdIns (Phosphatidylinositol), PtdIns4P (Phosphatidylinositol 4-phosphate) and PtdIns(4,5)P2 (Phosphatidylinositol 4,5-bisphosphate) to generate phosphatidylinositol 3,4,5-trisphosphate (PIP3). PIP3 plays a key role by recruiting PH domain-containing proteins to the…	3.2221	Homo sapiens	Kinase
FNDC5	Fibronectin type III domain-containing protein 5; [Irisin]: Contrary to mouse, may not be involved in the beneficial effects of muscular exercise, nor in the induction of browning of human white adipose tissue.	3.19925	Homo sapiens	Other
HSPA5	Endoplasmic reticulum chaperone BiP; Endoplasmic reticulum chaperone that plays a key role in protein folding and quality control in the endoplasmic reticulum lumen. Involved in the correct folding of proteins and degradation of misfolded proteins via its interaction with DNAJC10/ERdj5, probably to facilitate the release of DNAJC10/ERdj5 from its substrate (By similarity). Acts as a key repressor…	2.73847	Homo sapiens	Other
PRKACG	cAMP-dependent protein kinase catalytic subunit gamma; Phosphorylates a large number of substrates in the cytoplasm and the nucleus.	2.90155	Homo sapiens	Kinase
PRKACA	cAMP-dependent protein kinase catalytic subunit alpha; Phosphorylates a large number of substrates in the cytoplasm and the nucleus. Regulates the abundance of compartmentalized pools of its regulatory subunits through phosphorylation of PJA2 which binds and ubiquitinates these subunits, leading to their subsequent proteolysis. Phosphorylates CDC25B, ABL1, NFKB1, CLDN3, PSMC5/RPT6, PJA2, RYR2, RO…	2.90584	Homo sapiens	Kinase
PRKACB	cAMP-dependent protein kinase catalytic subunit beta; Mediates cAMP-dependent signaling triggered by receptor binding to GPCRs. PKA activation regulates diverse cellular processes such as cell proliferation, the cell cycle, differentiation and regulation of microtubule dynamics, chromatin condensation and decondensation, nuclear envelope disassembly and reassembly, as well as regulation of intrac…	2.90447	Homo sapiens	Kinase
IGF1R	Insulin-like growth factor 1 receptor alpha chain; Receptor tyrosine kinase which mediates actions of insulin- like growth factor 1 (IGF1). Binds IGF1 with high affinity and IGF2 and insulin (INS) with a lower affinity. The activated IGF1R is involved in cell growth and survival control. IGF1R is crucial for tumor transformation and survival of malignant cell. Ligand binding activates the recepto…	2.73285	Homo sapiens	Kinase
NR1D1	Nuclear receptor subfamily 1 group D member 1; Transcriptional repressor which coordinates circadian rhythm and metabolic pathways in a heme-dependent manner. Integral component of the complex transcription machinery that governs circadian rhythmicity and forms a critical negative limb of the circadian clock by directly repressing the expression of core clock components ARTNL/BMAL1, CLOCK and CRY…	2.73806	Homo sapiens	Nuclear Receptor
NR0B2	Nuclear receptor subfamily 0 group B member 2; Transcriptional regulator that acts as a negative regulator of receptor-dependent signaling pathways (By similarity). Specifically inhibits transactivation of the nuclear receptor with which it interacts (By similarity). Inhibits transcriptional activity of NEUROD1 on E-box-containing promoter by interfering with the coactivation function of the p300…	4.51705	Homo sapiens	Nuclear Receptor
GPX5	Epididymal secretory glutathione peroxidase; Protects cells and enzymes from oxidative damage, by catalyzing the reduction of hydrogen peroxide, lipid peroxides and organic hydroperoxide, by glutathione. May constitute a glutathione peroxidase-like protective system against peroxide damage in sperm membrane lipids.	2.96955	Homo sapiens	Enzyme
GPX6	Glutathione peroxidase 6.	2.96451	Homo sapiens	Enzyme
GPX3	Glutathione peroxidase 3; Protects cells and enzymes from oxidative damage, by catalyzing the reduction of hydrogen peroxide, lipid peroxides and organic hydroperoxide, by glutathione.	2.99883	Homo sapiens	Enzyme
GPX2	Glutathione peroxidase 2; Could play a major role in protecting mammals from the toxicity of ingested organic hydroperoxides. Tert-butyl hydroperoxide, cumene hydroperoxide and linoleic acid hydroperoxide but not phosphatidycholine hydroperoxide, can act as acceptors.	2.96894	Homo sapiens	Enzyme
ADIPOR2	Adiponectin receptor protein 2; Receptor for ADIPOQ, an essential hormone secreted by adipocytes that regulates glucose and lipid metabolism. Required for normal body fat and glucose homeostasis. ADIPOQ-binding activates a signaling cascade that leads to increased PPARA activity, and ultimately to increased fatty acid oxidation and glucose uptake. Has intermediate affinity for globular and full-l…	3.14402	Homo sapiens	Other
GPX7	Glutathione peroxidase 7; It protects esophageal epithelia from hydrogen peroxide- induced oxidative stress. It suppresses acidic bile acid-induced reactive oxigen species (ROS) and protects against oxidative DNA damage and double-strand breaks; Belongs to the glutathione peroxidase family.	2.97176	Homo sapiens	Enzyme
GPX8	Glutathione peroxidase 8; Belongs to the glutathione peroxidase family.	2.96353	Homo sapiens	Enzyme
PRDM16	Histone-lysine N-methyltransferase PRDM16; Binds DNA and functions as a transcriptional regulator. Displays histone methyltransferase activity and monomethylates 'Lys-9' of histone H3 (H3K9me1) in vitro (By similarity). Probably catalyzes the monomethylation of free histone H3 in the cytoplasm which is then transported to the nucleus and incorporated into nucleosomes where SUV39H methyltransferas…	3.18995	Homo sapiens	TF-Epigenetic
ADIPOR1	Adiponectin receptor protein 1; Receptor for ADIPOQ, an essential hormone secreted by adipocytes that regulates glucose and lipid metabolism. Required for normal glucose and fat homeostasis and for maintaining a normal body weight. ADIPOQ-binding activates a signaling cascade that leads to increased AMPK activity, and ultimately to increased fatty acid oxidation, increased glucose uptake and decr…	3.19178	Homo sapiens	Other
NFE2L2	Nuclear factor erythroid 2-related factor 2; Transcription factor that plays a key role in the response to oxidative stress: binds to antioxidant response (ARE) elements present in the promoter region of many cytoprotective genes, such as phase 2 detoxifying enzymes, and promotes their expression, thereby neutralizing reactive electrophiles. In normal conditions, ubiquitinated and degraded in the…	2.8787	Homo sapiens	Transcription Factor
NOS3	Nitric oxide synthase, endothelial; Produces nitric oxide (NO) which is implicated in vascular smooth muscle relaxation through a cGMP-mediated signal transduction pathway. NO mediates vascular endothelial growth factor (VEGF)-induced angiogenesis in coronary vessels and promotes blood clotting through the activation of platelets; Belongs to the NOS family.	3.08796	Homo sapiens	Enzyme
HDAC8	Histone deacetylase 8; Responsible for the deacetylation of lysine residues on the N-terminal part of the core histones (H2A, H2B, H3 and H4). Histone deacetylation gives a tag for epigenetic repression and plays an important role in transcriptional regulation, cell cycle progression and developmental events. Histone deacetylases act via the formation of large multiprotein complexes. Also involve…	4.34227	Homo sapiens	Epigenetic
STK11	Serine/threonine-protein kinase STK11; Tumor suppressor serine/threonine-protein kinase that controls the activity of AMP-activated protein kinase (AMPK) family members, thereby playing a role in various processes such as cell metabolism, cell polarity, apoptosis and DNA damage response. Acts by phosphorylating the T-loop of AMPK family proteins, thus promoting their activity: phosphorylates PRKA…	2.74204	Homo sapiens	Kinase
ENPP1	Ectonucleotide pyrophosphatase/phosphodiesterase family member 1, secreted form; Nucleotide pyrophosphatase that generates diphosphate (PPi) and functions in bone mineralization and soft tissue calcification by regulating pyrophosphate levels (By similarity). PPi inhibits bone mineralization and soft tissue calcification by binding to nascent hydroxyapatite crystals, thereby preventing further gr…	4.43458	Homo sapiens	Enzyme
NAMPT	Nicotinamide phosphoribosyltransferase; Catalyzes the condensation of nicotinamide with 5- phosphoribosyl-1-pyrophosphate to yield nicotinamide mononucleotide, an intermediate in the biosynthesis of NAD. It is the rate limiting component in the mammalian NAD biosynthesis pathway. The secreted form behaves both as a cytokine with immunomodulating properties and an adipokine with anti-diabetic prop…	3.32849	Homo sapiens	Enzyme
TUB	Tubby protein homolog; Functions in signal transduction from heterotrimeric G protein-coupled receptors. Binds to membranes containing phosphatidylinositol 4,5-bisphosphate. Can bind DNA (in vitro). May contribute to the regulation of transcription in the nucleus. Could be involved in the hypothalamic regulation of body weight (By similarity). Contribute to stimulation of phagocytosis of apoptoti…	4.39397	Homo sapiens	Transcription Factor
PNPLA3	1-acylglycerol-3-phosphate O-acyltransferase PNPLA3; Specifically catalyzes coenzyme A (CoA)-dependent acylation of 1-acyl-sn-glycerol 3-phosphate (2-lysophosphatidic acid/LPA) to generate phosphatidic acid (PA), an important metabolic intermediate and precursor for both triglycerides and glycerophospholipids. Does not esterify other lysophospholipids. Acyl donors are long chain (at least C16) fa…	4.61063	Homo sapiens	Enzyme
DGAT1	Diacylglycerol O-acyltransferase 1; Catalyzes the terminal and only committed step in triacylglycerol synthesis by using diacylglycerol and fatty acyl CoA as substrates. In contrast to DGAT2 it is not essential for survival. May be involved in VLDL (very low density lipoprotein) assembly. In liver, plays a role in esterifying exogenous fatty acids to glycerol. Functions as the major acyl-CoA reti…	3.02501	Homo sapiens	Enzyme
PNLIP	Pancreatic lipase; Belongs to the AB hydrolase superfamily. Lipase family.	3.25586	Homo sapiens	Enzyme
OXT	Oxytocin-neurophysin 1; Neurophysin 1 specifically binds oxytocin.	2.92447	Homo sapiens	Other
PPY	Pancreatic icosapeptide; Pancreatic hormone is synthesized in pancreatic islets of Langerhans and acts as a regulator of pancreatic and gastrointestinal functions.	2.75836	Homo sapiens	Other
MC3R	Melanocortin receptor 3; Receptor for MSH (alpha, beta and gamma) and ACTH. This receptor is mediated by G proteins which activate adenylate cyclase. Required for expression of anticipatory patterns of activity and wakefulness during periods of limited nutrient availability and for the normal regulation of circadian clock activity in the brain.	2.83962	Homo sapiens	GPCR
CYP19A1	Aromatase; A cytochrome P450 monooxygenase that catalyzes the conversion of C19 androgens, androst-4-ene-3,17-dione (androstenedione) and testosterone to the C18 estrogens, estrone and estradiol, respectively. Catalyzes three successive oxidations of C19 androgens: two conventional oxidations at C19 yielding 19-hydroxy and 19-oxo/19-aldehyde derivatives, followed by a third oxidative aromatizatio…	2.91249	Homo sapiens	Enzyme
PYY	Peptide YY(3-36); This gut peptide inhibits exocrine pancreatic secretion, has a vasoconstrictory action and inhibitis jejunal and colonic mobility.	3.50316	Homo sapiens	Other
CARTPT	Cocaine- and amphetamine-regulated transcript protein; Satiety factor closely associated with the actions of leptin and neuropeptide y; this anorectic peptide inhibits both normal and starvation-induced feeding and completely blocks the feeding response induced by neuropeptide Y and regulated by leptin in the hypothalamus. It promotes neuronal development and survival in vitro.	4.57419	Homo sapiens	Other
NTRK2	BDNF/NT-3 growth factors receptor; Receptor tyrosine kinase involved in the development and the maturation of the central and the peripheral nervous systems through regulation of neuron survival, proliferation, migration, differentiation, and synapse formation and plasticity (By similarity). Receptor for BDNF/brain-derived neurotrophic factor and NTF4/neurotrophin-4. Alternatively can also bind N…	4.49084	Homo sapiens	Kinase
SHBG	Sex hormone-binding globulin; Functions as an androgen transport protein, but may also be involved in receptor mediated processes. Each dimer binds one molecule of steroid. Specific for 5-alpha-dihydrotestosterone, testosterone, and 17-beta-estradiol. Regulates the plasma metabolic clearance rate of steroid hormones by controlling their plasma concentration.	3.34995	Homo sapiens	Other
MC4R	Melanocortin receptor 4; Receptor specific to the heptapeptide core common to adrenocorticotropic hormone and alpha-, beta-, and gamma-MSH. Plays a central role in energy homeostasis and somatic growth. This receptor is mediated by G proteins that stimulate adenylate cyclase (cAMP).	4.82081	Homo sapiens	GPCR
GHSR	Growth hormone secretagogue receptor type 1; Receptor for ghrelin, coupled to G-alpha-11 proteins. Stimulates growth hormone secretion. Binds also other growth hormone releasing peptides (GHRP) (e.g. Met-enkephalin and GHRP-6) as well as non-peptide, low molecular weight secretagogues (e.g. L-692,429, MK- 0677, adenosine).	2.871	Homo sapiens	GPCR
SIM1	Single-minded homolog 1; Transcriptional factor that may have pleiotropic effects during embryogenesis and in the adult.	2.74453	Homo sapiens	Transcription Factor
MAGEL2	MAGE-like protein 2; Probably enhances ubiquitin ligase activity of RING-type zinc finger-containing E3 ubiquitin-protein ligases, possibly through recruitment and/or stabilization of the Ubl-conjugating enzyme (E2) at the E3:substrate complex. Acts as a regulator of retrograde transport via its interaction with VPS35. Recruited to retromer-containing endosomes and promotes the formation of 'Lys-…	4.47264	Homo sapiens	Other
PMCH	Neuropeptide-glutamic acid-isoleucine; MCH may act as a neurotransmitter or neuromodulator in a broad array of neuronal functions directed toward the regulation of goal-directed behavior, such as food intake, and general arousal. May also have a role in spermatocyte differentiation; Belongs to the melanin-concentrating hormone family.	2.79969	Homo sapiens	Other
GNRH1	GnRH-associated peptide 1; Stimulates the secretion of gonadotropins; it stimulates the secretion of both luteinizing and follicle-stimulating hormones.	2.78633	Homo sapiens	Other
CRH	Corticoliberin; Hormone regulating the release of corticotropin from pituitary gland (By similarity). Induces NLRP6 in intestinal epithelial cells, hence may influence gut microbiota profile (By similarity).	2.89901	Homo sapiens	Other
PTH	Parathyroid hormone; PTH elevates calcium level by dissolving the salts in bone and preventing their renal excretion. Stimulates [1-14C]-2-deoxy-D- glucose (2DG) transport and glycogen synthesis in osteoblastic cells.	2.89945	Homo sapiens	Other
NPPB	Brain natriuretic peptide 32; Cardiac hormone which may function as a paracrine antifibrotic factor in the heart. Also plays a key role in cardiovascular homeostasis through natriuresis, diuresis, vasorelaxation, and inhibition of renin and aldosterone secretion. Specifically binds and stimulates the cGMP production of the NPR1 receptor. Binds the clearance receptor NPR3. Belongs to the natriuret…	2.95967	Homo sapiens	Other
IGF2	Insulin-like growth factor II Ala-25 Del; The insulin-like growth factors possess growth-promoting activity. Major fetal growth hormone in mammals. Plays a key role in regulating fetoplacental development. IGF-II is influenced by placental lactogen. Also involved in tissue differentiation. Positively regulates myogenic transcription factor MYOD1 function by facilitating the recruitment of transcr…	2.86112	Homo sapiens	Other
GIP	Gastric inhibitory polypeptide; Potent stimulator of insulin secretion and relatively poor inhibitor of gastric acid secretion.	3.18531	Homo sapiens	Other
ADRB3	Beta-3 adrenergic receptor; Beta-adrenergic receptors mediate the catecholamine-induced activation of adenylate cyclase through the action of G proteins. Beta- 3 is involved in the regulation of lipolysis and thermogenesis.	4.66091	Homo sapiens	GPCR
SERPINA12	Serpin A12; Adipokine that modulates insulin action by specifically inhibiting its target protease KLK7 in white adipose tissues. Belongs to the serpin family.	2.80815	Homo sapiens	Other
RBP4	Plasma retinol-binding protein(1-176); Retinol-binding protein that mediates retinol transport in blood plasma. Delivers retinol from the liver stores to the peripheral tissues (Probable). Transfers the bound all-trans retinol to STRA6, that then facilitates retinol transport across the cell membrane ; Belongs to the calycin superfamily. Lipocalin family.	2.98006	Homo sapiens	Other
RARRES2	Retinoic acid receptor responder protein 2; Adipocyte-secreted protein (adipokine) that regulates adipogenesis, metabolism and inflammation through activation of the chemokine-like receptor 1 (CMKLR1). Its other ligands include G protein-coupled receptor 1 (GPR1) and chemokine receptor-like 2 (CCRL2). Positively regulates adipocyte differentiation, modulates the expression of adipocyte genes invo…	3.03506	Homo sapiens	Other
ITLN1	Intelectin-1; Lectin that specifically recognizes microbial carbohydrate chains in a calcium-dependent manner. Binds to microbial glycans that contain a terminal acyclic 1,2-diol moiety, including beta-linked D-galactofuranose (beta- Galf), D-phosphoglycerol-modified glycans, D-glycero-D-talo-oct-2- ulosonic acid (KO) and 3-deoxy-D-manno-oct-2-ulosonic acid (KDO). Binds to glycans from Gram-posit…	2.92548	Homo sapiens	Other
CFD	Complement factor D; Factor D cleaves factor B when the latter is complexed with factor C3b, activating the C3bbb complex, which then becomes the C3 convertase of the alternate pathway. Its function is homologous to that of C1s in the classical pathway; Belongs to the peptidase S1 family.	2.84713	Homo sapiens	Enzyme
GCGR	Glucagon receptor; G-protein coupled receptor for glucagon that plays a central role in the regulation of blood glucose levels and glucose homeostasis. Regulates the rate of hepatic glucose production by promoting glycogen hydrolysis and gluconeogenesis. Plays an important role in mediating the responses to fasting. Ligand binding causes a conformation change that triggers signaling via guanine n…	2.75502	Homo sapiens	GPCR
IGFBP3	Insulin-like growth factor-binding protein 3; IGF-binding proteins prolong the half-life of the IGFs and have been shown to either inhibit or stimulate the growth promoting effects of the IGFs on cell culture. They alter the interaction of IGFs with their cell surface receptors. Also exhibits IGF-independent antiproliferative and apoptotic effects mediated by its receptor TMEM219/IGFBP-3R.	2.73632	Homo sapiens	Other
NR3C2	Mineralocorticoid receptor; Receptor for both mineralocorticoids (MC) such as aldosterone and glucocorticoids (GC) such as corticosterone or cortisol. Binds to mineralocorticoid response elements (MRE) and transactivates target genes. The effect of MC is to increase ion and water transport and thus raise extracellular fluid volume and blood pressure and lower potassium levels; Belongs to the nucl…	2.7479	Homo sapiens	Nuclear Receptor
BGLAP	Osteocalcin; Constitutes 1-2% of the total bone protein. It binds strongly to apatite and calcium.	2.80479	Homo sapiens	Other
IGFBP1	Insulin-like growth factor-binding protein 1; IGF-binding proteins prolong the half-life of the IGFs and have been shown to either inhibit or stimulate the growth promoting effects of the IGFs on cell culture. They alter the interaction of IGFs with their cell surface receptors. Promotes cell migration.	2.76269	Homo sapiens	Other
TCF7L2	Transcription factor 7-like 2; Participates in the Wnt signaling pathway and modulates MYC expression by binding to its promoter in a sequence-specific manner. Acts as repressor in the absence of CTNNB1, and as activator in its presence. Activates transcription from promoters with several copies of the Tcf motif 5'-CCTTTGATC-3' in the presence of CTNNB1. TLE1, TLE2, TLE3 and TLE4 repress transact…	2.84212	Homo sapiens	Transcription Factor
PCSK1	Neuroendocrine convertase 1; Involved in the processing of hormone and other protein precursors at sites comprised of pairs of basic amino acid residues. Substrates include POMC, renin, enkephalin, dynorphin, somatostatin, insulin and AGRP; Belongs to the peptidase S8 family. Furin subfamily.	4.54307	Homo sapiens	Enzyme
MGAM	Maltase-glucoamylase, intestinal; May serve as an alternate pathway for starch digestion when luminal alpha-amylase activity is reduced because of immaturity or malnutrition. May play a unique role in the digestion of malted dietary oligosaccharides used in food manufacturing.	2.94763	Homo sapiens	Enzyme
SI	Sucrase-isomaltase, intestinal; Plays an important role in the final stage of carbohydrate digestion. Isomaltase activity is specific for both alpha-1,4- and alpha-1,6-oligosaccharides; Belongs to the glycosyl hydrolase 31 family.	2.92834	Homo sapiens	Enzyme
AMY1B	Amylase alpha 1B; Belongs to the glycosyl hydrolase 13 family.	2.76573	Homo sapiens
AMY2A	Pancreatic alpha-amylase; Amylase alpha 2A.	2.85145	Homo sapiens	Enzyme
PIK3CB	Phosphatidylinositol 4,5-bisphosphate 3-kinase catalytic subunit beta isoform; Phosphoinositide-3-kinase (PI3K) that phosphorylates PtdIns (Phosphatidylinositol), PtdIns4P (Phosphatidylinositol 4-phosphate) and PtdIns(4,5)P2 (Phosphatidylinositol 4,5-bisphosphate) to generate phosphatidylinositol 3,4,5-trisphosphate (PIP3). PIP3 plays a key role by recruiting PH domain-containing proteins to the …	3.22272	Homo sapiens	Kinase
FTO	Alpha-ketoglutarate-dependent dioxygenase FTO; RNA demethylase that mediates oxidative demethylation of different RNA species, such as mRNAs, tRNAs and snRNAs, and acts as a regulator of fat mass, adipogenesis and energy homeostasis. Specifically demethylates N(6)- methyladenosine (m6A) RNA, the most prevalent internal modification of messenger RNA (mRNA) in higher eukaryotes. M6A demethylation b…	4.83038	Homo sapiens	Enzyme
NCOA1	Nuclear receptor coactivator 1; Nuclear receptor coactivator that directly binds nuclear receptors and stimulates the transcriptional activities in a hormone- dependent fashion. Involved in the coactivation of different nuclear receptors, such as for steroids (PGR, GR and ER), retinoids (RXRs), thyroid hormone (TRs) and prostanoids (PPARs). Also involved in coactivation mediated by STAT3, STAT5A,…	2.73225	Homo sapiens	Epigenetic
GOT2	Aspartate aminotransferase, mitochondrial; Catalyzes the irreversible transamination of the L-tryptophan metabolite L-kynurenine to form kynurenic acid (KA). Plays a key role in amino acid metabolism. Important for metabolite exchange between mitochondria and cytosol. Facilitates cellular uptake of long-chain free fatty acids; Belongs to the class-I pyridoxal-phosphate-dependent aminotransferase …	2.84725	Homo sapiens	Enzyme
HSD11B1	Corticosteroid 11-beta-dehydrogenase isozyme 1; Catalyzes reversibly the conversion of cortisol to the inactive metabolite cortisone. Catalyzes reversibly the conversion of 7-ketocholesterol to 7-beta-hydroxycholesterol. In intact cells, the reaction runs only in one direction, from 7-ketocholesterol to 7-beta- hydroxycholesterol (By similarity).	2.86696	Homo sapiens	Enzyme
CPE	Carboxypeptidase E; Sorting receptor that directs prohormones to the regulated secretory pathway. Acts also as a prohormone processing enzyme in neuro/endocrine cells, removing dibasic residues from the C-terminal end of peptide hormone precursors after initial endoprotease cleavage. Belongs to the peptidase M14 family.	4.4571	Homo sapiens	Enzyme
GIPR	Gastric inhibitory polypeptide receptor; This is a receptor for GIP. The activity of this receptor is mediated by G proteins which activate adenylyl cyclase; Belongs to the G-protein coupled receptor 2 family.	2.83432	Homo sapiens	GPCR
GNAS	Guanine nucleotide-binding protein G(s) subunit alpha isoforms XLas; Guanine nucleotide-binding proteins (G proteins) function as transducers in numerous signaling pathways controlled by G protein- coupled receptors (GPCRs). Signaling involves the activation of adenylyl cyclases, resulting in increased levels of the signaling molecule cAMP. GNAS functions downstream of several GPCRs, including be…	4.45095	Homo sapiens	Other
MRAP2	Melanocortin-2 receptor accessory protein 2; Modulator of melanocortin receptor 4 (MC4R), a receptor involved in energy homeostasis. Plays a central role in the control of energy homeostasis and body weight regulation by increasing ligand- sensitivity of MC4R and MC4R-mediated generation of cAMP (By similarity). May also act as a negative regulator of MC2R: competes with MRAP for binding to MC2R …	4.47344	Homo sapiens	Other
BBS9	Protein PTHB1; The BBSome complex is thought to function as a coat complex required for sorting of specific membrane proteins to the primary cilia. The BBSome complex is required for ciliogenesis but is dispensable for centriolar satellite function. This ciliogenic function is mediated in part by the Rab8 GDP/GTP exchange factor, which localizes to the basal body and contacts the BBSome. Rab8(GTP…	4.43656	Homo sapiens	Other
TTC21B	Tetratricopeptide repeat protein 21B; Component of the IFT complex A (IFT-A), a complex required for retrograde ciliary transport and entry into cilia of G protein- coupled receptors (GPCRs). Essential for retrograde trafficking of IFT- 1, IFT-B and GPCRs. Negatively modulates the SHH signal transduction (By similarity); Belongs to the TTC21 family.	4.30268	Homo sapiens	Other
MKKS	McKusick-Kaufman/Bardet-Biedl syndromes putative chaperonin; Probable molecular chaperone that assists the folding of proteins upon ATP hydrolysis. Plays a role in the assembly of BBSome, a complex involved in ciliogenesis regulating transports vesicles to the cilia. May play a role in protein processing in limb, cardiac and reproductive system development. May play a role in cytokinesis. Belongs…	4.12881	Homo sapiens	Other
ALMS1	Alstrom syndrome protein 1; Involved in PCM1-dependent intracellular transport. Required, directly or indirectly, for the localization of NCAPD2 to the proximal ends of centrioles. Required for proper formation and/or maintenance of primary cilia (PC), microtubule-based structures that protrude from the surface of epithelial cells.	4.50799	Homo sapiens	Other
RPGRIP1L	Protein fantom; Negatively regulates signaling through the G-protein coupled thromboxane A2 receptor (TBXA2R). May be involved in mechanisms like programmed cell death, craniofacial development, patterning of the limbs, and formation of the left-right axis (By similarity). Involved in the organization of apical junctions; the function is proposed to implicate a NPHP1-4-8 module. Does not seem to …	3.33213	Homo sapiens	Other
C8orf37	Protein C8orf37; May be involved in photoreceptor outer segment disk morphogenesis (By similarity).	4.298	Homo sapiens	Other
IFT172	Intraflagellar transport protein 172 homolog; Required for the maintenance and formation of cilia. Plays an indirect role in hedgehog (Hh) signaling, cilia being required for all activity of the hedgehog pathway (By similarity); Belongs to the IFT172 family.	4.35828	Homo sapiens	Other
IFT74	Intraflagellar transport protein 74 homolog; Component of the intraflagellar transport (IFT) complex B: together with IFT81, forms a tubulin-binding module that specifically mediates transport of tubulin within the cilium. Binds beta-tubulin via its basic region. Required for ciliogenesis. Belongs to the IFT74 family.	4.31209	Homo sapiens	Other
SDCCAG8	Serologically defined colon cancer antigen 8; Plays a role in the establishment of cell polarity and epithelial lumen formation (By similarity). Plays also an essential role in ciliogenesis and subsequent Hedgehog signaling pathway that requires the presence of intact primary cilia for pathway activation. Mechanistically, interacts with and mediates RABEP2 centrosomal localization which is critic…	4.38525	Homo sapiens	Other
IFT27	Intraflagellar transport protein 27 homolog; Small GTPase-like component of the intraflagellar transport (IFT) complex B that promotes the exit of the BBSome complex from cilia via its interaction with ARL6. Not involved in entry of the BBSome complex into cilium. Prevents aggregation of GTP-free ARL6. Required for hedgehog signaling. Forms a subcomplex within the IFT complex B with IFT25. Its ro…	4.34783	Homo sapiens	Enzyme
CCDC28B	Coiled-coil domain-containing protein 28B; Involved in ciliogenesis. Regulates cilia length through its interaction with MAPKAP1/SIN1 but independently of mTORC2 complex. Modulates mTORC2 complex assembly and function, possibly enhances AKT1 phosphorylation. Does not seem to modulate assembly and function of mTORC1 complex.	4.27007	Homo sapiens	Other
TRIM32	E3 ubiquitin-protein ligase TRIM32; Has an E3 ubiquitin ligase activity. Ubiquitinates DTNBP1 (dysbindin) and promotes its degradation. May ubiquitinate BBS2. May play a significant role in mediating the biological activity of the HIV-1 Tat protein in vivo. Binds specifically to the activation domain of HIV-1 Tat and can also interact with the HIV-2 and EIAV Tat proteins in vivo; Belongs to the T…	4.36026	Homo sapiens	Enzyme
TMEM67	Meckelin; Required for ciliary structure and function. Part of the tectonic-like complex which is required for tissue-specific ciliogenesis and may regulate ciliary membrane composition (By similarity). Involved in centrosome migration to the apical cell surface during early ciliogenesis. Involved in the regulation of cilia length and appropriate number through the control of centrosome duplicati…	4.29864	Homo sapiens	Other
ARL6	ADP-ribosylation factor-like protein 6; Involved in membrane protein trafficking at the base of the ciliary organelle. Mediates recruitment onto plasma membrane of the BBSome complex which would constitute a coat complex required for sorting of specific membrane proteins to the primary cilia. Together with BBS1, is necessary for correct trafficking of PKD1 to primary cilia (By similarity). Togeth…	4.24518	Homo sapiens	Enzyme
WDPCP	WD repeat-containing and planar cell polarity effector protein fritz homolog; Probable effector of the planar cell polarity signaling pathway which regulates the septin cytoskeleton in both ciliogenesis and collective cell movements. Together with FUZ and WDPCP proposed to function as core component of the CPLANE (ciliogenesis and planar polarity effectors) complex involved in the recruitment of …	4.31641	Homo sapiens	Other
CEP290	Centrosomal protein of 290 kDa; Involved in early and late steps in cilia formation. Its association with CCP110 is required for inhibition of primary cilia formation by CCP110. May play a role in early ciliogenesis in the disappearance of centriolar satellites and in the transition of primary ciliar vesicles (PCVs) to capped ciliary vesicles (CCVs). Required for the centrosomal recruitment of RA…	4.37752	Homo sapiens	Other
MKS1	Meckel syndrome type 1 protein; Component of the tectonic-like complex, a complex localized at the transition zone of primary cilia and acting as a barrier that prevents diffusion of transmembrane proteins between the cilia and plasma membranes. Involved in centrosome migration to the apical cell surface during early ciliogenesis. Required for ciliary structure and function, including a role in r…	4.34413	Homo sapiens	Other
BBS12	Bardet-Biedl syndrome 12 protein; Component of the chaperonin-containing T-complex (TRiC), a molecular chaperone complex that assists the folding of proteins upon ATP hydrolysis. As part of the TRiC complex may play a role in the assembly of BBSome, a complex involved in ciliogenesis regulating transports vesicles to the cilia. Involved in adipogenic differentiation. Belongs to the TCP-1 chaperon…	4.43747	Homo sapiens	Other
BBS10	Bardet-Biedl syndrome 10 protein; Probable molecular chaperone that assists the folding of proteins upon ATP hydrolysis. Plays a role in the assembly of BBSome, a complex involved in ciliogenesis regulating transports vesicles to the cilia. Involved in adipogenic differentiation. Belongs to the TCP-1 chaperonin family.	4.46548	Homo sapiens	Other
LZTFL1	Leucine zipper transcription factor-like protein 1; Regulates ciliary localization of the BBSome complex. Together with the BBSome complex, controls SMO ciliary trafficking and contributes to the sonic hedgehog (SHH) pathway regulation. May play a role in neurite outgrowth. May have tumor suppressor function. Belongs to the LZTFL1 family.	4.36831	Homo sapiens	Other
BBS1	Bardet-Biedl syndrome 1 protein; The BBSome complex is thought to function as a coat complex required for sorting of specific membrane proteins to the primary cilia. The BBSome complex is required for ciliogenesis but is dispensable for centriolar satellite function. This ciliogenic function is mediated in part by the Rab8 GDP/GTP exchange factor, which localizes to the basal body and contacts th…	4.51368	Homo sapiens	Other
BBS5	Bardet-Biedl syndrome 5 protein; The BBSome complex is thought to function as a coat complex required for sorting of specific membrane proteins to the primary cilia. The BBSome complex is required for ciliogenesis but is dispensable for centriolar satellite function. This ciliogenic function is mediated in part by the Rab8 GDP/GTP exchange factor, which localizes to the basal body and contacts th…	4.44657	Homo sapiens	Other
TTC8	Tetratricopeptide repeat protein 8; The BBSome complex is thought to function as a coat complex required for sorting of specific membrane proteins to the primary cilia. The BBSome complex is required for ciliogenesis but is dispensable for centriolar satellite function. This ciliogenic function is mediated in part by the Rab8 GDP/GTP exchange factor, which localizes to the basal body and contacts…	4.34348	Homo sapiens	Other
BBIP1	BBSome interacting protein 1.	4.36325	Homo sapiens	Other
BBS4	Bardet-Biedl syndrome 4 protein; The BBSome complex is thought to function as a coat complex required for sorting of specific membrane proteins to the primary cilia. The BBSome complex is required for ciliogenesis but is dispensable for centriolar satellite function. This ciliogenic function is mediated in part by the Rab8 GDP/GTP exchange factor, which localizes to the basal body and contacts th…	4.48679	Homo sapiens	Other
BBS7	Bardet-Biedl syndrome 7 protein; The BBSome complex is thought to function as a coat complex required for sorting of specific membrane proteins to the primary cilia. The BBSome complex is required for ciliogenesis but is dispensable for centriolar satellite function. This ciliogenic function is mediated in part by the Rab8 GDP/GTP exchange factor, which localizes to the basal body and contacts th…	4.45671	Homo sapiens	Other
BBS2	Bardet-Biedl syndrome 2 protein; The BBSome complex is thought to function as a coat complex required for sorting of specific membrane proteins to the primary cilia. The BBSome complex is required for ciliogenesis but is dispensable for centriolar satellite function. This ciliogenic function is mediated in part by the Rab8 GDP/GTP exchange factor, which localizes to the basal body and contacts th…	4.49218	Homo sapiens	Other
KIF7	Kinesin-like protein KIF7; Essential for hedgehog signaling regulation: acts as both a negative and positive regulator of sonic hedgehog (Shh) and Indian hedgehog (Ihh) pathways, acting downstream of SMO, through both SUFU- dependent and -independent mechanisms. Involved in the regulation of microtubular dynamics. Required for proper organization of the ciliary tip and control of ciliary localiza…	4.25184	Homo sapiens	Other
NEGR1	Neuronal growth regulator 1; May be involved in cell-adhesion. May function as a trans- neural growth-promoting factor in regenerative axon sprouting in the mammalian brain (By similarity); Belongs to the immunoglobulin superfamily. IgLON family.	3.36314	Homo sapiens	Other
SLC6A14	Sodium- and chloride-dependent neutral and basic amino acid transporter B(0+); Mediates the uptake of a broad range of neutral and cationic amino acids (with the exception of proline) in a Na(+)/Cl(-)-dependent manner.	4.33175	Homo sapiens	Transporter
FFAR4	Free fatty acid receptor 4; Receptor for medium and long-chain free fatty acids (FFAs). Signals via a G(q)/G(11)-coupled pathway. Acts as a receptor for omega- 3 fatty acids and mediates robust anti-inflammatory effects, particularly in macrophages and fat cells. The anti-inflammatory effects involve inhibition of TAK1 through a beta-arrestin 2 (ARRB2)/TAB1-dependent effect, but independent of th…	2.89048	Homo sapiens	GPCR
SH2B1	SH2B adapter protein 1; Adapter protein for several members of the tyrosine kinase receptor family. Involved in multiple signaling pathways mediated by Janus kinase (JAK) and receptor tyrosine kinases, including the receptors of insulin (INS), insulin-like growth factor I (IGF1), nerve growth factor (NGF), brain-derived neurotrophic factor (BDNF), glial cell line-derived neurotrophic factor (GDNF…	3.33223	Homo sapiens	Other
ASIP	Agouti-signaling protein; Involved in the regulation of melanogenesis. The binding of ASP to MC1R precludes alpha-MSH initiated signaling and thus blocks production of cAMP, leading to a down-regulation of eumelanogenesis (brown/black pigment) and thus increasing synthesis of pheomelanin (yellow/red pigment). In higher primates, agouti may affect the quality of hair pigmentation rather than its p…	4.38704	Homo sapiens	Other
DIO2	Type II iodothyronine deiodinase; Responsible for the deiodination of T4 (3,5,3',5'- tetraiodothyronine) into T3 (3,5,3'-triiodothyronine). Essential for providing the brain with appropriate levels of T3 during the critical period of development.	2.77559	Homo sapiens	Enzyme
CEP19	Centrosomal protein of 19 kDa; Required for ciliation. Recruits the RABL2B GTPase to the ciliary base to initiate ciliation. After specifically capturing the activated GTP- bound RABL2B, the CEP19-RABL2B complex binds intraflagellar transport (IFT) complex B from the large pool pre-docked at the base of the cilium and thus triggers its entry into the cilia. Involved in the early steps in cilia fo…	4.36145	Homo sapiens	Other
EIF2S3	Eukaryotic translation initiation factor 2 subunit 3; As a subunit of eukaryotic initiation factor 2 (eIF2), involved in the early steps of protein synthesis. In the presence of GTP, eIF2 forms a ternary complex with initiator tRNA Met-tRNAi and then recruits the 40S ribosomal complex, a step that determines the rate of protein translation. This step is followed by mRNA binding to form the 43S pr…	4.28388	Homo sapiens	Other
TMEM18	Transmembrane protein 18; Transcription repressor. Sequence-specific ssDNA and dsDNA binding protein, with preference for GCT end CTG repeats. Cell migration modulator which enhances the glioma-specific migration ability of neural stem cells (NSC) and neural precursor cells (NPC). Belongs to the TMEM18 family.	3.11533	Homo sapiens	Other
GPBAR1	G-protein coupled bile acid receptor 1; Receptor for bile acid. Bile acid-binding induces its internalization, activation of extracellular signal-regulated kinase and intracellular cAMP production. May be involved in the suppression of macrophage functions by bile acids.	3.00311	Homo sapiens	GPCR
KLB	Beta-klotho; Contributes to the transcriptional repression of cholesterol 7-alpha-hydroxylase (CYP7A1), the rate-limiting enzyme in bile acid synthesis. Probably inactive as a glycosidase. Increases the ability of FGFR1 and FGFR4 to bind FGF21 (By similarity).	2.78336	Homo sapiens	Enzyme
KIDINS220	Kinase D-interacting substrate of 220 kDa; Promotes a prolonged MAP-kinase signaling by neurotrophins through activation of a Rap1-dependent mechanism. Provides a docking site for the CRKL-C3G complex, resulting in Rap1-dependent sustained ERK activation. May play an important role in regulating postsynaptic signal transduction through the syntrophin-mediated localization of receptor tyrosine kin…	4.29154	Homo sapiens	Enzyme
ADCY3	Adenylate cyclase type 3; Catalyzes the formation of the signaling molecule cAMP in response to G-protein signaling. Participates in signaling cascades triggered by odorant receptors via its function in cAMP biosynthesis. Required for the perception of odorants. Required for normal sperm motility and normal male fertility. Plays a role in regulating insulin levels and body fat accumulation in res…	4.61388	Homo sapiens	Enzyme
ENPP2	Ectonucleotide pyrophosphatase/phosphodiesterase family member 2; Hydrolyzes lysophospholipids to produce the signaling molecule lysophosphatidic acid (LPA) in extracellular fluids. Major substrate is lysophosphatidylcholine. Also can act on sphingosylphosphorylcholine producing sphingosine-1-phosphate, a modulator of cell motility. Can hydrolyze, in vitro, bis-pNPP, to some extent pNP-TMP, and b…	4.41927	Homo sapiens	Enzyme
CNR1	Cannabinoid receptor 1; G-protein coupled receptor for endogenous cannabinoids (eCBs), including N-arachidonoylethanolamide (also called anandamide or AEA) and 2-arachidonoylglycerol (2-AG), as well as phytocannabinoids, such as delta(9)-tetrahydrocannabinol (THC). Mediates many cannabinoid-induced effects, acting, among others, on food intake, memory loss, gastrointestinal motility, catalepsy, a…	4.55809	Homo sapiens	GPCR
INPP5E	Phosphatidylinositol polyphosphate 5-phosphatase type IV; Phosphatidylinositol (PtdIns) phosphatase that specifically hydrolyzes the 5-phosphate of phosphatidylinositol-3,4,5-trisphosphate (PtdIns(3,4,5)P3), phosphatidylinositol 4,5-bisphosphate (PtdIns(4,5)P2) and phosphatidylinositol 3,5-bisphosphate (PtdIns(3,5)P2) (By similarity). Specific for lipid substrates, inactive towards water soluble …	4.28829	Homo sapiens	Enzyme
VPS13B	Vacuolar protein sorting-associated protein 13B; May be involved in protein sorting in post Golgi membrane traffic; Belongs to the VPS13 family.	4.3414	Homo sapiens	Other
AFF4	AF4/FMR2 family member 4; Key component of the super elongation complex (SEC), a complex required to increase the catalytic rate of RNA polymerase II transcription by suppressing transient pausing by the polymerase at multiple sites along the DNA. In the SEC complex, AFF4 acts as a central scaffold that recruits other factors through direct interactions with ELL proteins (ELL, ELL2 or ELL3) and t…	4.24624	Homo sapiens	Transcription Factor
TFAP2B	Transcription factor AP-2-beta; Sequence-specific DNA-binding protein that interacts with inducible viral and cellular enhancer elements to regulate transcription of selected genes. AP-2 factors bind to the consensus sequence 5'-GCCNNNGGC-3' and activate genes involved in a large spectrum of important biological functions including proper eye, face, body wall, limb and neural tube development. Th…	2.98241	Homo sapiens	Transcription Factor
LGR4	Leucine-rich repeat-containing G-protein coupled receptor 4; Receptor for R-spondins that potentiates the canonical Wnt signaling pathway and is involved in the formation of various organs. Upon binding to R-spondins (RSPO1, RSPO2, RSPO3 or RSPO4), associates with phosphorylated LRP6 and frizzled receptors that are activated by extracellular Wnt receptors, triggering the canonical Wnt signaling p…	2.83575	Homo sapiens	GPCR
DYRK1B	Dual specificity tyrosine-phosphorylation-regulated kinase 1B; Dual-specificity kinase which possesses both serine/threonine and tyrosine kinase activities. Enhances the transcriptional activity of TCF1/HNF1A and FOXO1. Inhibits epithelial cell migration. Mediates colon carcinoma cell survival in mitogen-poor environments. Inhibits the SHH and WNT1 pathways, thereby enhancing adipogenesis. In add…	4.29207	Homo sapiens	Kinase
CELA2A	Chymotrypsin-like elastase family member 2A; Acts upon elastin.	4.1724	Homo sapiens	Enzyme
LAS1L	Ribosomal biogenesis protein LAS1L; Involved in the biogenesis of the 60S ribosomal subunit. Required for maturation of the 28S rRNA. Functions as a component of the Five Friends of Methylated CHTOP (5FMC) complex; the 5FMC complex is recruited to ZNF148 by methylated CHTOP, leading to desumoylation of ZNF148 and subsequent transactivation of ZNF148 target genes.	4.1171	Homo sapiens	Other

## Sheet: overlap_VAT
display name	log2FC	adj.P.Val	STRING description	disease score
MLXIPL	-1.36908	0.0389782	MLX interacting protein like.	3.02052
FASN	-1.60641	0.0300941	Uncharacterized protein.	3.2344
CXCL8	-3.12525	0.0282154	Interleukin-8; IL-8 is a chemotactic factor that attracts neutrophils, basophils, and T-cells, but not monocytes. It is also involved in neutrophil activation. It is released from several cell types in response to an inflammatory stimulus; Belongs to the intercrine alpha (chemokine CxC) family.	3.2324
ITGAM	-1.76622	0.0143168	Integrin subunit alpha M; Belongs to the integrin alpha chain family.	2.81725
CPE	1.21202	0.00531049	Carboxypeptidase E.	4.45637
FABP4	1.27142	0.0445907	Fatty acid-binding protein, adipocyte; Lipid transport protein in adipocytes. Binds both long chain fatty acids and retinoic acid. Delivers long-chain fatty acids and retinoic acid to their cognate receptors in the nucleus (By similarity). Involved in the regulation of intramuscular fat accretion ; Belongs to the calycin superfamily. Fatty-acid binding protein (FABP) family.	3.42273
MAPK3	-1.41168	0.010031	Mitogen-activated protein kinase; Belongs to the protein kinase superfamily. Ser/Thr protein kinase family. MAP kinase subfamily.	2.95814
MRTFA	-1.35402	0.00986669	Myocardin related transcription factor A.
RPS29	1.11021	0.00668863	40S ribosomal protein S29.
MGP	2.12643	1.00319e-05	Matrix Gla protein; Associates with the organic matrix of bone and cartilage.
COL6A1	-1.48286	0.0142617	Collagen type VI alpha 1 chain.
COL1A1	-1.37489	0.0280185	Collagen type I alpha 1 chain.
NCOR2	-1.10078	0.00261547	Uncharacterized protein.
ITIH4	-1.44142	0.0377317	Inter-alpha-trypsin inhibitor heavy chain H4; Type II acute-phase protein (APP) involved in inflammatory responses to trauma.
TM6SF2	-1.32992	0.0476241	Transmembrane 6 superfamily member 2
