# Supplementary material for: Pre-metabolic syndrome transcriptional response of adipose tissue and liver to obesity in the Ossabaw pig model
Source: Research Square preprint supplement (doi:10.21203/rs.3.rs-8039124/v1), 2025-12-06
Supplement: Supplementary file 5 [file 9e892c8392e7a7f114520674.xlsx]

## Sheet: human gene signatures
Effector_cells	Cytotoxic T cells	IFNG	GZMA	GZMB	PRF1	GZMK	ZAP70	GNLY	FASLG	TBX21	EOMES	CD8A	CD8B
NK_cells	NK cells	NKG7	CD244	NCR1	KLRK1	CD226	GZMH	GNLY	IFNG	KIR2DL4	EOMES	GZMB	KLRF1	SH2D1B	NCR3
T_cells	T cells	TBX21	ITK	CD3D	CD3E	CD3G	CD28	CD5	TRAT1
B_cells	B cells	CD19	MS4A1	TNFRSF13C	TNFRSF17	TNFRSF13B	CD22	CD79A	CD79B	BLK	FCRL5	PAX5	STAP1
M1_signatures	activated macrophages	NOS2	TNF	IL1B	SOCS3	CMKLR1	IRF5	IL12A	IL12B	IL23A
Th1_signature	Th1 signature	IFNG	IL2	CD40LG	IL21	TBX21	STAT4	IL12RB2
Treg	Treg	FOXP3	CTLA4	IL10	TNFRSF18	CCR8	IKZF4	IKZF2
Neutrophil_signature	Neutrophil signature	MPO	ELANE	PRTN3	CXCR2	CD177	FFAR2	PGLYRP1
MDSC	Myeloid-Derived Suppressor Cells	IDO1	ARG1	IL10	CYBB	PTGS2	IL4I1	IL6
Th2_signature	Th2 signature	IL4	IL5	IL13	IL10	CCR4
Matrix	Fibroblasts	FN1	COL1A1	COL1A2	COL4A1	COL3A1	VTN	LGALS7	LGALS9	LAMA3	LAMB3	LAMC2	TNC	ELN	COL5A1	COL11A1
Matrix_remodeling	Fibroblasts	CA9	MMP9	MMP2	MMP1	MMP3	MMP12	MMP7	MMP11	PLOD2	ADAMTS4	ADAMTS5	LOX
Angiogenesis	Endothelium	VEGFA	VEGFB	VEGFC	PDGFC	CXCL8	CXCR2	FLT1	PGF	KDR	ANGPT1	ANGPT2	TEK	VWF	CDH5

## Sheet: pig gene signatures
Basophil	MS4A2	FCER1A	ENSSSCG00000021222	ENSSSCG00000034555	CCN3	S100A10	CSF2RB	GNG11	ENSSSCG00000036983	SRGN	EGR1	S100A4	LMNA	VIM	LTC4S	KIT	SNORC	ENSSSCG00000037142	ALOX5AP	NPY
Beige adipocyte	CCL21	EMP1	CAVIN2	EGR1	LYVE1	ENSSSCG00000003155	MMRN1	BTG2	VIM	ENSSSCG00000005437	FABP5	RAMP2	ATF3	UBC	GNG11	PRSS23	ENSSSCG00000029160	CAV1	S100A10	FOS
Endothelial cell	FABP5	ENSSSCG00000035293	FABP4	ENSSSCG00000032591	IL6	EMP1	APOA1	TM4SF1	RAMP2	PECAM1	CLEC3B	ENSSSCG00000004572	CAV1	ENSSSCG00000032436	VWF	BTG2	UBC	CYYR1	ACKR1	YBX3
Fibro-adipogenic progenitor	ENSSSCG00000029441	ENSSSCG00000031903	NEB	TNNI2	ENSSSCG00000036052	FLNC	ENSSSCG00000038561	TRDN	ABCA6	ATP2A1	MYBPC2	ENO3	PYGM	ENSSSCG00000004207	ENSSSCG00000036948	OBSCN	ADAMTSL3	DMD	COL6A3	PLXDC2
Mast cell	ENSSSCG00000021222	MS4A2	ENSSSCG00000029160	FCER1A	ZFAND2A	BAG3	LMNA	CCN3	DNAJB1	KIT	HSPH1	PTGS2	SQSTM1	GNG11	LTC4S	S100A10	CSF2RB	RGCC	MRPS6	ENSSSCG00000034555

## Sheet: pig sign repeats
Signatures with repeats	Number of repeated genes
Basophil || Mast cell	11
Beige adipocyte || Endothelial cell	6
Basophil || Beige adipocyte	4
Beige adipocyte || Mast cell	3
Basophil || Beige adipocyte || Mast cell	2
