# Supplementary material for: Pre-metabolic syndrome transcriptional response of adipose tissue and liver to obesity in the Ossabaw pig model
Source: Research Square preprint supplement (doi:10.21203/rs.3.rs-8039124/v1), 2025-12-06
Supplement: Supplementary file 6 [file a25edc555173f02011f1d090.xlsx]

## Sheet: DE results_VAT
transcript_id	logFC	AveExpr	P.Value	adj.P.Val	coef	transcript_biotype	ensembl_gene_id	external_gene_name
ENSSSCT00000042794	2.08625	8.97943	2.66647e-09	6.91042e-05	MC-HFD vs.Control	protein_coding	ENSSSCG00000037697	MGP
ENSSSCT00000076326	-1.70036	5.51523	1.77125e-07	0.00229518	MC-HFD vs.Control	protein_coding	ENSSSCG00000042640	NA
ENSSSCT00000079260	1.15481	6.27366	3.48899e-07	0.0025013	MC-HFD vs.Control	protein_coding	ENSSSCG00000014921	PRSS23
ENSSSCT00000024845	-1.11871	5.2846	3.99748e-07	0.0025013	MC-HFD vs.Control	protein_coding	ENSSSCG00000023483	PLXNA3
ENSSSCT00000037842	-1.26693	3.76917	6.60348e-07	0.0025013	MC-HFD vs.Control	protein_coding	ENSSSCG00000000968	SBF1
ENSSSCT00000082867	-1.36962	4.66038	7.10405e-07	0.0025013	MC-HFD vs.Control	protein_coding	ENSSSCG00000012918	GRK2
ENSSSCT00000052452	-1.52452	2.76203	7.14207e-07	0.0025013	MC-HFD vs.Control	protein_coding	ENSSSCG00000011399	GNAI2
ENSSSCT00000100475	-1.50497	4.77663	9.50774e-07	0.0025013	MC-HFD vs.Control	protein_coding	ENSSSCG00000017962	KDM6B
ENSSSCT00000048754	-1.06889	7.84342	1.03818e-06	0.0025013	MC-HFD vs.Control	protein_coding	ENSSSCG00000032478	MLLT6
ENSSSCT00000064651	-1.1051	4.68901	1.2397e-06	0.0025013	MC-HFD vs.Control	protein_coding	ENSSSCG00000003030	CIC
ENSSSCT00000099742	-1.27311	2.34111	1.26838e-06	0.0025013	MC-HFD vs.Control	protein_coding	ENSSSCG00000016372	STK25
ENSSSCT00000096320	-1.98624	2.17939	1.07111e-06	0.0025013	MC-HFD vs.Control	lncRNA	ENSSSCG00000060027	NA
ENSSSCT00000100002	-1.23437	3.50306	1.35122e-06	0.0025013	MC-HFD vs.Control	lncRNA	ENSSSCG00000057653	NA
ENSSSCT00000099034	-2.63487	0.975492	5.38498e-06	0.0029273	MC-HFD vs.Control	lncRNA	ENSSSCG00000059183	NA
ENSSSCT00000046403	-1.49245	4.24291	2.43926e-06	0.0029273	MC-HFD vs.Control	protein_coding	ENSSSCG00000032668	NA
ENSSSCT00000102378	2.51935	8.94842	2.74685e-06	0.0029273	MC-HFD vs.Control	snoRNA	ENSSSCG00000052388	NA
ENSSSCT00000102265	-1.63861	3.76586	3.75479e-06	0.0029273	MC-HFD vs.Control	pseudogene	ENSSSCG00000053583	NA
ENSSSCT00000064010	-1.18172	4.40059	3.96292e-06	0.0029273	MC-HFD vs.Control	protein_coding	ENSSSCG00000022553	TNRC18
ENSSSCT00000104522	-2.30049	2.24492	4.04387e-06	0.0029273	MC-HFD vs.Control	lncRNA	ENSSSCG00000063162	NA
ENSSSCT00000062288	1.64167	4.82408	4.37767e-06	0.0029273	MC-HFD vs.Control	protein_coding	ENSSSCG00000032003	NA
ENSSSCT00000085291	1.03658	4.47091	4.4672e-06	0.0029273	MC-HFD vs.Control	protein_coding	ENSSSCG00000002860	PDCD5
ENSSSCT00000019857	2.24423	4.93425	4.48328e-06	0.0029273	MC-HFD vs.Control	snoRNA	ENSSSCG00000018262	SNORA53
ENSSSCT00000051843	1.14704	7.70142	4.78794e-06	0.0029273	MC-HFD vs.Control	protein_coding	ENSSSCG00000038880	RPL23
ENSSSCT00000070926	-1.15577	2.65523	4.25176e-06	0.0029273	MC-HFD vs.Control	protein_coding	ENSSSCG00000033082	HGS
ENSSSCT00000015402	1.03763	4.96003	4.91546e-06	0.0029273	MC-HFD vs.Control	protein_coding	ENSSSCG00000014100	TBCA
ENSSSCT00000003199	-1.04053	6.15148	5.89618e-06	0.0029273	MC-HFD vs.Control	protein_coding	ENSSSCG00000002895	KMT2B
ENSSSCT00000055175	1.04395	8.01956	6.01079e-06	0.0029273	MC-HFD vs.Control	protein_coding	ENSSSCG00000035768	RPS15A
ENSSSCT00000075525	2.70821	1.23037	3.41856e-06	0.0029273	MC-HFD vs.Control	snoRNA	ENSSSCG00000044718	SNORA74
ENSSSCT00000072749	-1.78824	3.58953	5.39031e-06	0.0029273	MC-HFD vs.Control	lncRNA	ENSSSCG00000051406	NA
ENSSSCT00000092871	-1.77064	3.01351	5.86653e-06	0.0029273	MC-HFD vs.Control	lncRNA	ENSSSCG00000061292	NA
ENSSSCT00000104427	-1.66652	2.32205	4.06998e-06	0.0029273	MC-HFD vs.Control	lncRNA	ENSSSCG00000056082	NA
ENSSSCT00000095281	-1.44434	5.44346	4.15866e-06	0.0029273	MC-HFD vs.Control	lncRNA	ENSSSCG00000053509	NA
ENSSSCT00000098286	-1.44113	3.22961	3.1553e-06	0.0029273	MC-HFD vs.Control	lncRNA	ENSSSCG00000060610	NA
ENSSSCT00000099399	-1.37266	5.40043	2.11481e-06	0.0029273	MC-HFD vs.Control	lncRNA	ENSSSCG00000062767	NA
ENSSSCT00000102964	-1.27047	4.0407	4.03458e-06	0.0029273	MC-HFD vs.Control	lncRNA	ENSSSCG00000061058	NA
ENSSSCT00000090919	-1.10092	5.06531	3.66397e-06	0.0029273	MC-HFD vs.Control	lncRNA	ENSSSCG00000041111	NA
ENSSSCT00000097133	-1.09365	2.0298	5.31369e-06	0.0029273	MC-HFD vs.Control	lncRNA	ENSSSCG00000059334	NA
ENSSSCT00000106823	-1.18045	4.01898	6.36366e-06	0.00293754	MC-HFD vs.Control	protein_coding	ENSSSCG00000032921	INO80E
ENSSSCT00000000204	-1.07254	5.71035	6.80092e-06	0.00293754	MC-HFD vs.Control	protein_coding	ENSSSCG00000035856	NA
ENSSSCT00000013985	-1.0255	2.91916	6.58328e-06	0.00293754	MC-HFD vs.Control	protein_coding	ENSSSCG00000012793	HCFC1
ENSSSCT00000056944	-1.39213	2.35051	6.30723e-06	0.00293754	MC-HFD vs.Control	protein_coding	ENSSSCG00000014802	NUMA1
ENSSSCT00000073420	-1.66155	4.23544	6.71827e-06	0.00293754	MC-HFD vs.Control	lncRNA	ENSSSCG00000041348	NA
ENSSSCT00000096683	2.31072	5.91314	7.6791e-06	0.00300518	MC-HFD vs.Control	snoRNA	ENSSSCG00000055272	NA
ENSSSCT00000005518	1.05582	8.20544	7.71751e-06	0.00300518	MC-HFD vs.Control	protein_coding	ENSSSCG00000038507	RPS29
ENSSSCT00000044664	-1.17232	6.07139	7.83896e-06	0.00300518	MC-HFD vs.Control	protein_coding	ENSSSCG00000039541	ANKRD11
ENSSSCT00000045760	1.00072	9.56519	8.45783e-06	0.00300518	MC-HFD vs.Control	protein_coding	ENSSSCG00000034617	NA
ENSSSCT00000104063	-1.33646	1.35158	8.42984e-06	0.00300518	MC-HFD vs.Control	protein_coding	ENSSSCG00000017238	TTYH2
ENSSSCT00000047046	-1.47555	1.37198	7.9493e-06	0.00300518	MC-HFD vs.Control	lncRNA	ENSSSCG00000037652	NA
ENSSSCT00000091709	-1.02525	4.24901	8.75341e-06	0.00306303	MC-HFD vs.Control	protein_coding	ENSSSCG00000055777	NA
ENSSSCT00000092766	-1.37395	3.14978	9.04761e-06	0.00308523	MC-HFD vs.Control	protein_coding	ENSSSCG00000036871	EXOC3L4
ENSSSCT00000092828	-1.18768	1.52768	9.5857e-06	0.00318491	MC-HFD vs.Control	protein_coding	ENSSSCG00000005832	MAMDC4
ENSSSCT00000089804	-1.13683	1.89023	9.96268e-06	0.00321183	MC-HFD vs.Control	protein_coding	ENSSSCG00000024777	HDAC4
ENSSSCT00000029425	-1.07944	6.42141	1.08765e-05	0.00321245	MC-HFD vs.Control	protein_coding	ENSSSCG00000028278	POLR2A
ENSSSCT00000067788	-1.25556	6.31653	1.09366e-05	0.00321245	MC-HFD vs.Control	protein_coding	ENSSSCG00000051618	SETD1B
ENSSSCT00000072754	-1.76122	2.66259	1.04519e-05	0.00321245	MC-HFD vs.Control	protein_coding	ENSSSCG00000037898	CXXC5
ENSSSCT00000071621	-1.12806	1.93893	1.11561e-05	0.00321245	MC-HFD vs.Control	protein_coding	ENSSSCG00000012837	CHID1
ENSSSCT00000104972	-1.11478	2.40815	1.06425e-05	0.00321245	MC-HFD vs.Control	lncRNA	ENSSSCG00000061994	NA
ENSSSCT00000078773	-1.35177	4.30835	1.19358e-05	0.00325773	MC-HFD vs.Control	protein_coding	ENSSSCG00000001513	SYNGAP1
ENSSSCT00000106758	-1.56352	1.66556	1.17982e-05	0.00325773	MC-HFD vs.Control	lncRNA	ENSSSCG00000059072	NA
ENSSSCT00000010015	1.03189	8.72945	1.28909e-05	0.0033408	MC-HFD vs.Control	protein_coding	ENSSSCG00000009146	NA
ENSSSCT00000005522	1.3087	5.64095	1.32875e-05	0.00334279	MC-HFD vs.Control	protein_coding	ENSSSCG00000005006	RPL36AL
ENSSSCT00000027450	1.03578	8.80945	1.33648e-05	0.00334279	MC-HFD vs.Control	protein_coding	ENSSSCG00000035007	NA
ENSSSCT00000076778	-1.00633	3.03979	1.34145e-05	0.00334279	MC-HFD vs.Control	lncRNA	ENSSSCG00000051566	NA
ENSSSCT00000100872	-1.22137	3.96875	1.40572e-05	0.00337348	MC-HFD vs.Control	protein_coding	ENSSSCG00000016573	IRF5
ENSSSCT00000040627	-1.00944	2.7054	1.40583e-05	0.00337348	MC-HFD vs.Control	protein_coding	ENSSSCG00000010915	NAV1
ENSSSCT00000049730	1.15988	7.00535	1.59236e-05	0.00366749	MC-HFD vs.Control	protein_coding	ENSSSCG00000054047	RPL22
ENSSSCT00000052432	-1.19462	3.90481	1.69096e-05	0.00374954	MC-HFD vs.Control	protein_coding	ENSSSCG00000046279	SAP25
ENSSSCT00000020945	1.9952	2.83774	1.69276e-05	0.00374954	MC-HFD vs.Control	snoRNA	ENSSSCG00000019350	SNORD15
ENSSSCT00000102686	-1.35468	3.10692	1.67095e-05	0.00374954	MC-HFD vs.Control	lncRNA	ENSSSCG00000057305	NA
ENSSSCT00000038153	1.29504	2.37821	1.7093e-05	0.00375409	MC-HFD vs.Control	protein_coding	ENSSSCG00000008480	MORN2
ENSSSCT00000051438	-1.12775	6.301	1.83955e-05	0.0038585	MC-HFD vs.Control	protein_coding	ENSSSCG00000033720	NA
ENSSSCT00000047303	-1.05842	4.87143	1.95514e-05	0.00402139	MC-HFD vs.Control	protein_coding	ENSSSCG00000031925	NA
ENSSSCT00000036293	-2.14433	-0.336924	1.99202e-05	0.00406498	MC-HFD vs.Control	protein_coding	ENSSSCG00000038220	RXRA
ENSSSCT00000035409	1.00179	6.65725	2.0218e-05	0.0040935	MC-HFD vs.Control	protein_coding	ENSSSCG00000006610	S100A11
ENSSSCT00000071760	-2.81451	2.80659	2.6797e-05	0.0041093	MC-HFD vs.Control	lncRNA	ENSSSCG00000048083	NA
ENSSSCT00000096224	1.0028	6.92834	2.22247e-05	0.0041093	MC-HFD vs.Control	protein_coding	ENSSSCG00000020830	NA
ENSSSCT00000012432	-1.14257	4.68309	2.3359e-05	0.0041093	MC-HFD vs.Control	protein_coding	ENSSSCG00000011355	NA
ENSSSCT00000059414	-1.19185	3.85475	2.37552e-05	0.0041093	MC-HFD vs.Control	protein_coding	ENSSSCG00000038164	RAI1
ENSSSCT00000006033	-1.08339	5.93239	2.3308e-05	0.0041093	MC-HFD vs.Control	protein_coding	ENSSSCG00000005487	COL27A1
ENSSSCT00000104337	-1.26963	2.41957	2.30345e-05	0.0041093	MC-HFD vs.Control	protein_coding	ENSSSCG00000022553	TNRC18
ENSSSCT00000063881	-1.21159	6.02612	2.37534e-05	0.0041093	MC-HFD vs.Control	protein_coding	ENSSSCG00000032761	LAMA5
ENSSSCT00000073877	-1.49257	2.32031	2.35256e-05	0.0041093	MC-HFD vs.Control	protein_coding	ENSSSCG00000031441	GRAMD4
ENSSSCT00000063356	-1.19756	3.59095	2.55206e-05	0.0041093	MC-HFD vs.Control	protein_coding	ENSSSCG00000005916	NA
ENSSSCT00000103606	-1.1162	1.88075	2.33727e-05	0.0041093	MC-HFD vs.Control	protein_coding	ENSSSCG00000021158	MCF2L
ENSSSCT00000044949	-1.17572	2.72835	2.57816e-05	0.0041093	MC-HFD vs.Control	protein_coding	ENSSSCG00000016378	PASK
ENSSSCT00000098134	1.59123	15.9155	2.61008e-05	0.0041093	MC-HFD vs.Control	misc_RNA	ENSSSCG00000062074	Metazoa_SRP
ENSSSCT00000055292	-1.36723	2.85867	2.60769e-05	0.0041093	MC-HFD vs.Control	protein_coding	ENSSSCG00000013079	DAGLA
ENSSSCT00000013697	1.00783	2.66437	2.57466e-05	0.0041093	MC-HFD vs.Control	protein_coding	ENSSSCG00000012528	BEX3
ENSSSCT00000082495	-1.01995	2.31804	2.54483e-05	0.0041093	MC-HFD vs.Control	protein_coding	ENSSSCG00000025966	EIF4H
ENSSSCT00000010703	-1.07233	7.58036	2.62059e-05	0.0041093	MC-HFD vs.Control	protein_coding	ENSSSCG00000009761	NCOR2
ENSSSCT00000070313	1.53152	1.01004	2.4745e-05	0.0041093	MC-HFD vs.Control	protein_coding	ENSSSCG00000010250	VPS26A
ENSSSCT00000038925	-1.76441	-0.53309	2.72786e-05	0.00411165	MC-HFD vs.Control	protein_coding	ENSSSCG00000005841	RABL6
ENSSSCT00000003361	-1.24033	3.76361	2.88321e-05	0.00424552	MC-HFD vs.Control	protein_coding	ENSSSCG00000003030	CIC
ENSSSCT00000054836	-1.37696	1.56907	2.90916e-05	0.00425953	MC-HFD vs.Control	protein_coding	ENSSSCG00000017142	BAIAP2
ENSSSCT00000018737	1.18642	3.78518	2.97644e-05	0.00428857	MC-HFD vs.Control	protein_coding	ENSSSCG00000017212	SUMO2
ENSSSCT00000050539	-1.15468	3.06112	2.98722e-05	0.00428857	MC-HFD vs.Control	protein_coding	ENSSSCG00000002774	RIPOR1
ENSSSCT00000091855	-1.58072	-0.062472	2.99518e-05	0.00428857	MC-HFD vs.Control	protein_coding	ENSSSCG00000055170	NA
ENSSSCT00000102980	-1.24229	4.45383	3.2803e-05	0.00452813	MC-HFD vs.Control	protein_coding	ENSSSCG00000014567	TRIM66
ENSSSCT00000014244	-1.37263	0.980593	3.23286e-05	0.00452813	MC-HFD vs.Control	protein_coding	ENSSSCG00000013031	KCNK4
ENSSSCT00000106292	-1.25449	1.4701	3.2786e-05	0.00452813	MC-HFD vs.Control	lncRNA	ENSSSCG00000057616	NA
ENSSSCT00000027933	-1.16402	4.68719	3.49845e-05	0.00469366	MC-HFD vs.Control	protein_coding	ENSSSCG00000027970	PRRT2
ENSSSCT00000053253	1.02075	4.74506	3.54246e-05	0.00469366	MC-HFD vs.Control	protein_coding	ENSSSCG00000031938	NEDD8
ENSSSCT00000058543	1.0328	4.68187	3.55949e-05	0.00469366	MC-HFD vs.Control	protein_coding	ENSSSCG00000030668	UQCC2
ENSSSCT00000008529	-1.03273	5.22507	3.52669e-05	0.00469366	MC-HFD vs.Control	protein_coding	ENSSSCG00000007782	SETD1A
ENSSSCT00000059244	-1.77666	2.16159	3.53343e-05	0.00469366	MC-HFD vs.Control	protein_coding	ENSSSCG00000036512	FGFRL1
ENSSSCT00000038538	-1.70937	1.84835	3.58561e-05	0.00469366	MC-HFD vs.Control	protein_coding	ENSSSCG00000039094	PLEC
ENSSSCT00000017061	1.65401	8.65135	3.66391e-05	0.00474769	MC-HFD vs.Control	protein_coding	ENSSSCG00000054337	C4BPA
ENSSSCT00000038307	-1.00922	5.98193	3.8168e-05	0.00484883	MC-HFD vs.Control	protein_coding	ENSSSCG00000007719	NA
ENSSSCT00000092212	-1.15536	3.52572	3.8465e-05	0.00486273	MC-HFD vs.Control	lncRNA	ENSSSCG00000052462	NA
ENSSSCT00000013648	1.12268	4.95764	3.89058e-05	0.00486589	MC-HFD vs.Control	protein_coding	ENSSSCG00000012481	TSPAN6
ENSSSCT00000022034	1.13881	13.0893	4.11425e-05	0.00502948	MC-HFD vs.Control	ribozyme	ENSSSCG00000020439	RNaseP_nuc
ENSSSCT00000025648	-1.27134	0.867117	4.10784e-05	0.00502948	MC-HFD vs.Control	protein_coding	ENSSSCG00000014817	ARAP1
ENSSSCT00000000465	-1.06383	4.62578	4.30212e-05	0.00513795	MC-HFD vs.Control	protein_coding	ENSSSCG00000000431	MBD6
ENSSSCT00000093283	-1.08681	1.79998	4.39459e-05	0.00522432	MC-HFD vs.Control	protein_coding	ENSSSCG00000040001	TNFRSF25
ENSSSCT00000089105	1.06395	4.17462	4.5434e-05	0.00531049	MC-HFD vs.Control	protein_coding	ENSSSCG00000021374	NA
ENSSSCT00000009694	1.21202	5.7467	4.54904e-05	0.00531049	MC-HFD vs.Control	protein_coding	ENSSSCG00000008854	CPE
ENSSSCT00000003597	-1.26144	2.8139	4.66473e-05	0.00537294	MC-HFD vs.Control	protein_coding	ENSSSCG00000003238	SPACA6
ENSSSCT00000015143	1.49695	5.12244	4.64875e-05	0.00537294	MC-HFD vs.Control	protein_coding	ENSSSCG00000013863	SMIM7
ENSSSCT00000030780	1.03609	8.47443	4.70465e-05	0.00539494	MC-HFD vs.Control	protein_coding	ENSSSCG00000027358	RPS17
ENSSSCT00000076631	-1.17451	6.48976	4.97764e-05	0.00556037	MC-HFD vs.Control	protein_coding	ENSSSCG00000016381	SNED1
ENSSSCT00000094944	-1.31103	2.44012	5.06409e-05	0.00559108	MC-HFD vs.Control	protein_coding	ENSSSCG00000024285	DLG4
ENSSSCT00000069712	1.06616	6.41708	5.56146e-05	0.00581663	MC-HFD vs.Control	protein_coding	ENSSSCG00000028549	ECM2
ENSSSCT00000014831	2.05349	6.11236	5.68278e-05	0.00584425	MC-HFD vs.Control	protein_coding	ENSSSCG00000013579	CD209
ENSSSCT00000070458	-1.42431	1.59285	5.67489e-05	0.00584425	MC-HFD vs.Control	protein_coding	ENSSSCG00000017116	LPCAT1
ENSSSCT00000065659	-1.37284	1.34461	5.85198e-05	0.00592421	MC-HFD vs.Control	protein_coding	ENSSSCG00000017333	FMNL1
ENSSSCT00000100694	-1.40513	3.13357	6.07023e-05	0.00609753	MC-HFD vs.Control	lncRNA	ENSSSCG00000057599	NA
ENSSSCT00000062903	-1.45274	1.37611	6.51739e-05	0.00642223	MC-HFD vs.Control	protein_coding	ENSSSCG00000005832	MAMDC4
ENSSSCT00000103092	-1.27308	2.01877	6.57558e-05	0.00643067	MC-HFD vs.Control	protein_coding	ENSSSCG00000060035	PRAM1
ENSSSCT00000065929	-1.06316	3.08734	6.66889e-05	0.0064974	MC-HFD vs.Control	protein_coding	ENSSSCG00000000108	TMEM184B
ENSSSCT00000032601	-1.32042	3.26914	6.70989e-05	0.00651287	MC-HFD vs.Control	protein_coding	ENSSSCG00000007797	ITGAL
ENSSSCT00000095696	-1.27226	2.49211	6.74297e-05	0.00652055	MC-HFD vs.Control	protein_coding	ENSSSCG00000032761	LAMA5
ENSSSCT00000047904	-1.01012	5.73365	6.95425e-05	0.00664263	MC-HFD vs.Control	protein_coding	ENSSSCG00000038807	SCAF1
ENSSSCT00000042642	-1.18152	2.69711	7.40839e-05	0.0068184	MC-HFD vs.Control	protein_coding	ENSSSCG00000021363	CHD3
ENSSSCT00000008297	-1.07413	5.62773	7.46651e-05	0.0068184	MC-HFD vs.Control	protein_coding	ENSSSCG00000007565	TTYH3
ENSSSCT00000081165	-1.66307	3.39651	7.69786e-05	0.00690912	MC-HFD vs.Control	lncRNA	ENSSSCG00000051406	NA
ENSSSCT00000008845	1.17815	5.7868	7.73619e-05	0.00690912	MC-HFD vs.Control	protein_coding	ENSSSCG00000008072	ASPN
ENSSSCT00000068069	-1.0334	3.35817	7.82208e-05	0.00692506	MC-HFD vs.Control	protein_coding	ENSSSCG00000026084	SLC49A3
ENSSSCT00000065496	-1.17412	1.76069	8.2366e-05	0.00715695	MC-HFD vs.Control	protein_coding	ENSSSCG00000034896	HPRT1
ENSSSCT00000095198	1.03156	5.90645	8.27754e-05	0.00715695	MC-HFD vs.Control	protein_coding	ENSSSCG00000060790	COX6C
ENSSSCT00000102797	-1.08041	1.99807	8.50312e-05	0.00720733	MC-HFD vs.Control	lncRNA	ENSSSCG00000057892	NA
ENSSSCT00000039661	-1.10438	3.62088	8.71328e-05	0.00721449	MC-HFD vs.Control	protein_coding	ENSSSCG00000001619	FOXP4
ENSSSCT00000067293	-1.33211	1.23101	8.66602e-05	0.00721449	MC-HFD vs.Control	protein_coding	ENSSSCG00000012999	CAPN1
ENSSSCT00000091295	-1.42159	0.110931	8.62674e-05	0.00721449	MC-HFD vs.Control	protein_coding	ENSSSCG00000045701	NA
ENSSSCT00000096561	-1.18815	2.70919	8.77044e-05	0.00721957	MC-HFD vs.Control	protein_coding	ENSSSCG00000031925	NA
ENSSSCT00000035354	-1.20276	2.96284	8.8524e-05	0.00726009	MC-HFD vs.Control	protein_coding	ENSSSCG00000001242	GABBR1
ENSSSCT00000097401	-1.48383	1.24078	9.06386e-05	0.00733725	MC-HFD vs.Control	lncRNA	ENSSSCG00000055226	NA
ENSSSCT00000025587	1.41951	4.20419	9.40788e-05	0.00752504	MC-HFD vs.Control	snoRNA	ENSSSCG00000023953	NA
ENSSSCT00000088166	-1.181	1.33891	9.55293e-05	0.00752504	MC-HFD vs.Control	protein_coding	ENSSSCG00000011619	EEFSEC
ENSSSCT00000039431	-1.2903	1.27506	9.60957e-05	0.00754671	MC-HFD vs.Control	protein_coding	ENSSSCG00000003104	STRN4
ENSSSCT00000092076	1.6087	3.20056	9.7752e-05	0.00763054	MC-HFD vs.Control	snRNA	ENSSSCG00000060681	U1
ENSSSCT00000048496	-1.1546	4.95843	9.97136e-05	0.007691	MC-HFD vs.Control	protein_coding	ENSSSCG00000023362	RHBDF2
ENSSSCT00000097237	-1.12799	2.52884	0.000100573	0.00773426	MC-HFD vs.Control	lncRNA	ENSSSCG00000059699	NA
ENSSSCT00000044959	-1.68639	1.11471	0.0001012	0.00773878	MC-HFD vs.Control	protein_coding	ENSSSCG00000039094	PLEC
ENSSSCT00000026862	2.05025	4.97946	0.000109978	0.00793984	MC-HFD vs.Control	protein_coding	ENSSSCG00000015810	NA
ENSSSCT00000070729	-1.17103	3.40586	0.000111314	0.00796909	MC-HFD vs.Control	lncRNA	ENSSSCG00000045545	NA
ENSSSCT00000098233	1.16742	4.94897	0.000113667	0.00802666	MC-HFD vs.Control	protein_coding	ENSSSCG00000014232	LOX
ENSSSCT00000014674	-1.19118	1.8702	0.000114622	0.00806185	MC-HFD vs.Control	protein_coding	ENSSSCG00000034339	CBARP
ENSSSCT00000016163	1.04705	3.8247	0.000119453	0.00806185	MC-HFD vs.Control	protein_coding	ENSSSCG00000014812	FOLR2
ENSSSCT00000014240	-1.90942	-0.495009	0.000116508	0.00806185	MC-HFD vs.Control	protein_coding	ENSSSCG00000013027	NA
ENSSSCT00000048022	-3.87325	-2.03934	0.000115706	0.00806185	MC-HFD vs.Control	protein_coding	ENSSSCG00000037621	KIAA1522
ENSSSCT00000016759	1.07087	4.66002	0.000119999	0.00807762	MC-HFD vs.Control	protein_coding	ENSSSCG00000015384	TOMM7
ENSSSCT00000014320	1.0903	4.23307	0.000123864	0.00822486	MC-HFD vs.Control	protein_coding	ENSSSCG00000013100	NA
ENSSSCT00000071817	-1.0729	1.73406	0.000126838	0.0083095	MC-HFD vs.Control	protein_coding	ENSSSCG00000008024	CLCN7
ENSSSCT00000065442	-1.22685	0.596454	0.000126637	0.0083095	MC-HFD vs.Control	protein_coding	ENSSSCG00000008040	TSC2
ENSSSCT00000077525	-1.07333	3.02133	0.000129751	0.00842763	MC-HFD vs.Control	protein_coding	ENSSSCG00000033592	TMC8
ENSSSCT00000025338	2.76546	-0.536194	0.000137619	0.00865661	MC-HFD vs.Control	snoRNA	ENSSSCG00000023729	U8
ENSSSCT00000083458	-1.15257	2.79472	0.0001388	0.00868134	MC-HFD vs.Control	protein_coding	ENSSSCG00000007547	ADAP1
ENSSSCT00000074674	1.41122	4.22243	0.000139596	0.00868134	MC-HFD vs.Control	protein_coding	ENSSSCG00000062888	YWHAE
ENSSSCT00000006177	-1.45297	4.18128	0.000141463	0.00868134	MC-HFD vs.Control	protein_coding	ENSSSCG00000005617	STXBP1
ENSSSCT00000012778	1.0165	3.8268	0.000142423	0.00868478	MC-HFD vs.Control	processed_pseudogene	ENSSSCG00000011673	NA
ENSSSCT00000037324	-1.22171	0.68238	0.000142889	0.00869272	MC-HFD vs.Control	protein_coding	ENSSSCG00000017902	CAMTA2
ENSSSCT00000097392	-1.70452	2.04482	0.000144103	0.00869711	MC-HFD vs.Control	protein_coding	ENSSSCG00000062536	SHANK1
ENSSSCT00000067324	-1.30437	0.873968	0.000144303	0.00869711	MC-HFD vs.Control	protein_coding	ENSSSCG00000040095	GPR35
ENSSSCT00000027597	-1.07911	2.17485	0.000145029	0.00872059	MC-HFD vs.Control	protein_coding	ENSSSCG00000023045	BAHCC1
ENSSSCT00000026424	-1.39527	1.82702	0.00014819	0.00882722	MC-HFD vs.Control	protein_coding	ENSSSCG00000033059	CASKIN1
ENSSSCT00000038428	-1.97093	1.13817	0.000149205	0.00884849	MC-HFD vs.Control	protein_coding	ENSSSCG00000031398	NA
ENSSSCT00000085530	1.32754	4.51708	0.000149709	0.00885788	MC-HFD vs.Control	protein_coding	ENSSSCG00000039046	NA
ENSSSCT00000059717	-1.22915	2.37608	0.00015284	0.00894859	MC-HFD vs.Control	protein_coding	ENSSSCG00000016553	COPG2
ENSSSCT00000092306	-1.07045	2.01322	0.000152964	0.00894859	MC-HFD vs.Control	protein_coding	ENSSSCG00000057251	TMEM150B
ENSSSCT00000000408	1.1559	3.94684	0.000153984	0.00898795	MC-HFD vs.Control	protein_coding	ENSSSCG00000039506	MYL6
ENSSSCT00000056810	-1.04653	5.02806	0.000154825	0.00901412	MC-HFD vs.Control	protein_coding	ENSSSCG00000008722	SH3TC1
ENSSSCT00000019773	1.76638	0.667417	0.000158466	0.00907238	MC-HFD vs.Control	snoRNA	ENSSSCG00000018178	NA
ENSSSCT00000061110	-1.26712	3.8638	0.000164321	0.00918394	MC-HFD vs.Control	protein_coding	ENSSSCG00000017804	ABR
ENSSSCT00000060495	-1.77427	0.299882	0.000164429	0.00918394	MC-HFD vs.Control	protein_coding	ENSSSCG00000002520	NA
ENSSSCT00000062428	1.02598	8.93558	0.000166057	0.00919486	MC-HFD vs.Control	protein_coding	ENSSSCG00000035080	NA
ENSSSCT00000065827	-1.62806	1.31597	0.000167859	0.0091971	MC-HFD vs.Control	protein_coding	ENSSSCG00000017804	ABR
ENSSSCT00000090144	-1.18694	2.95703	0.000171558	0.00931151	MC-HFD vs.Control	lncRNA	ENSSSCG00000049147	NA
ENSSSCT00000066210	1.03386	2.14289	0.000172121	0.00931248	MC-HFD vs.Control	protein_coding	ENSSSCG00000001493	PRIM2
ENSSSCT00000053915	-1.06695	2.97657	0.000177178	0.00943511	MC-HFD vs.Control	protein_coding	ENSSSCG00000029553	CCDC57
ENSSSCT00000020295	1.68992	11.9038	0.000177202	0.00943511	MC-HFD vs.Control	ribozyme	ENSSSCG00000018700	RNase_MRP
ENSSSCT00000047508	-1.11993	6.04273	0.00017842	0.00945487	MC-HFD vs.Control	protein_coding	ENSSSCG00000036537	NFIC
ENSSSCT00000015786	-1.44898	-0.0103468	0.000193673	0.00978406	MC-HFD vs.Control	protein_coding	ENSSSCG00000014440	HMGXB3
ENSSSCT00000056898	-1.68061	3.18967	0.000194796	0.00982164	MC-HFD vs.Control	protein_coding	ENSSSCG00000032422	NA
ENSSSCT00000022965	-1.22903	2.57151	0.000195632	0.00984468	MC-HFD vs.Control	protein_coding	ENSSSCG00000022302	BICRA
ENSSSCT00000050723	-1.09871	2.17227	0.000197039	0.00989624	MC-HFD vs.Control	protein_coding	ENSSSCG00000011384	BSN
ENSSSCT00000019491	-1.48321	-0.534881	0.000201393	0.0100179	MC-HFD vs.Control	protein_coding	ENSSSCG00000017917	MINK1
ENSSSCT00000047002	1.42467	7.02629	0.000202593	0.010031	MC-HFD vs.Control	protein_coding	ENSSSCG00000033326	RPL37
ENSSSCT00000079208	-1.41168	-0.182912	0.000203592	0.010031	MC-HFD vs.Control	protein_coding	ENSSSCG00000040682	MAPK3
ENSSSCT00000035140	-1.20475	2.98747	0.000208921	0.0101966	MC-HFD vs.Control	protein_coding	ENSSSCG00000017235	NA
ENSSSCT00000047344	2.30119	4.42857	0.000213009	0.0102418	MC-HFD vs.Control	snoRNA	ENSSSCG00000062413	NA
ENSSSCT00000027772	-2.06971	2.00964	0.00021637	0.0103534	MC-HFD vs.Control	protein_coding	ENSSSCG00000026478	PADI2
ENSSSCT00000091210	-1.21958	0.993398	0.000218563	0.0104123	MC-HFD vs.Control	protein_coding	ENSSSCG00000000765	IL17RA
ENSSSCT00000082498	-1.12673	5.62833	0.000222942	0.0105242	MC-HFD vs.Control	lncRNA	ENSSSCG00000042641	NA
ENSSSCT00000060107	1.24614	7.80493	0.000225214	0.0106121	MC-HFD vs.Control	protein_coding	ENSSSCG00000035937	DPT
ENSSSCT00000041728	-1.1781	1.26641	0.000227575	0.0106561	MC-HFD vs.Control	protein_coding	ENSSSCG00000001513	SYNGAP1
ENSSSCT00000101945	1.13276	3.3877	0.000229536	0.0106561	MC-HFD vs.Control	protein_coding	ENSSSCG00000033500	SNRPD2
ENSSSCT00000008786	-1.20454	0.690274	0.000229233	0.0106561	MC-HFD vs.Control	protein_coding	ENSSSCG00000008018	MAPK8IP3
ENSSSCT00000022175	2.21508	-0.21766	0.000227195	0.0106561	MC-HFD vs.Control	snoRNA	ENSSSCG00000020580	NA
ENSSSCT00000020904	1.35107	2.90566	0.000232664	0.0107482	MC-HFD vs.Control	snoRNA	ENSSSCG00000019309	SNORA63
ENSSSCT00000063658	-1.20666	2.90659	0.000235706	0.0108195	MC-HFD vs.Control	protein_coding	ENSSSCG00000012848	EPS8L2
ENSSSCT00000074791	2.16544	0.165943	0.000235545	0.0108195	MC-HFD vs.Control	protein_coding	ENSSSCG00000031712	MFAP5
ENSSSCT00000096193	-1.82214	-1.1523	0.000244556	0.0109842	MC-HFD vs.Control	protein_coding	ENSSSCG00000039264	ABCA2
ENSSSCT00000056496	-1.01428	6.55049	0.000251032	0.0111591	MC-HFD vs.Control	protein_coding	ENSSSCG00000003592	SDC3
ENSSSCT00000077048	-1.16734	1.06144	0.000256849	0.0112753	MC-HFD vs.Control	protein_coding	ENSSSCG00000024201	TASOR
ENSSSCT00000096351	1.04352	5.89488	0.000258579	0.0112817	MC-HFD vs.Control	protein_coding	ENSSSCG00000039544	NA
ENSSSCT00000060687	-1.37489	6.13537	0.000261384	0.0113097	MC-HFD vs.Control	protein_coding	ENSSSCG00000005617	STXBP1
ENSSSCT00000006602	1.72697	1.58169	0.000264001	0.0113277	MC-HFD vs.Control	protein_coding	ENSSSCG00000006016	EIF3H
ENSSSCT00000045597	1.03876	5.9368	0.000264691	0.0113277	MC-HFD vs.Control	protein_coding	ENSSSCG00000038399	ATP5PF
ENSSSCT00000003379	1.03044	7.12185	0.00027424	0.0115377	MC-HFD vs.Control	protein_coding	ENSSSCG00000003042	RPS19
ENSSSCT00000069733	-1.54573	2.85077	0.000277934	0.0116364	MC-HFD vs.Control	protein_coding	ENSSSCG00000041467	CCDC194
ENSSSCT00000014198	-1.62817	0.404877	0.000277718	0.0116364	MC-HFD vs.Control	protein_coding	ENSSSCG00000012988	EHBP1L1
ENSSSCT00000061367	-2.06582	0.0956093	0.00027934	0.0116576	MC-HFD vs.Control	protein_coding	ENSSSCG00000035669	NA
ENSSSCT00000080920	-1.98413	0.163113	0.000284703	0.0118054	MC-HFD vs.Control	lncRNA	ENSSSCG00000050204	NA
ENSSSCT00000017420	1.3345	2.44339	0.000288376	0.0119005	MC-HFD vs.Control	protein_coding	ENSSSCG00000015999	FKBP7
ENSSSCT00000037434	-1.74749	2.85445	0.000289553	0.0119233	MC-HFD vs.Control	protein_coding	ENSSSCG00000007754	ITGAM
ENSSSCT00000022734	-1.22874	2.87194	0.000289847	0.0119233	MC-HFD vs.Control	protein_coding	ENSSSCG00000021241	ADAMTS13
ENSSSCT00000098882	-1.0711	1.18533	0.00029124	0.0119616	MC-HFD vs.Control	protein_coding	ENSSSCG00000007993	CAPN15
ENSSSCT00000061862	-1.20517	2.99464	0.000294312	0.0120116	MC-HFD vs.Control	protein_coding	ENSSSCG00000040339	ZFHX2
ENSSSCT00000024903	-1.00148	3.20072	0.000293976	0.0120116	MC-HFD vs.Control	protein_coding	ENSSSCG00000017333	FMNL1
ENSSSCT00000029781	-1.23637	0.114565	0.000293559	0.0120116	MC-HFD vs.Control	protein_coding	ENSSSCG00000014598	PPFIBP2
ENSSSCT00000102789	-1.89096	-0.588154	0.000298361	0.0120629	MC-HFD vs.Control	lncRNA	ENSSSCG00000059969	NA
ENSSSCT00000003912	-2.21014	2.59563	0.000301834	0.0121276	MC-HFD vs.Control	protein_coding	ENSSSCG00000003521	NA
ENSSSCT00000025396	1.7498	0.717261	0.000301469	0.0121276	MC-HFD vs.Control	misc_RNA	ENSSSCG00000023774	Metazoa_SRP
ENSSSCT00000063655	-1.40815	1.27836	0.000316236	0.0124377	MC-HFD vs.Control	protein_coding	ENSSSCG00000033702	SBSN
ENSSSCT00000055852	1.09064	9.58648	0.00031734	0.0124609	MC-HFD vs.Control	snoRNA	ENSSSCG00000040520	SCARNA10
ENSSSCT00000006882	1.08332	0.804988	0.000325656	0.0127104	MC-HFD vs.Control	protein_coding	ENSSSCG00000006282	KIFAP3
ENSSSCT00000019904	1.21009	6.16838	0.000329739	0.0127355	MC-HFD vs.Control	snoRNA	ENSSSCG00000018309	SNORD17
ENSSSCT00000035262	1.21459	1.51399	0.000334341	0.0127801	MC-HFD vs.Control	protein_coding	ENSSSCG00000021325	MCFD2
ENSSSCT00000002719	1.08247	3.59382	0.000334748	0.0127801	MC-HFD vs.Control	protein_coding	ENSSSCG00000002449	NDUFB1
ENSSSCT00000090210	-1.16384	0.517439	0.0003361	0.0127905	MC-HFD vs.Control	protein_coding	ENSSSCG00000016992	NEURL1B
ENSSSCT00000038131	1.02948	1.1234	0.000339139	0.0127953	MC-HFD vs.Control	protein_coding	ENSSSCG00000003976	NFYC
ENSSSCT00000014676	-1.18228	0.870575	0.000338927	0.0127953	MC-HFD vs.Control	protein_coding	ENSSSCG00000013432	MIDN
ENSSSCT00000008545	-1.30508	5.56352	0.000340039	0.0127953	MC-HFD vs.Control	protein_coding	ENSSSCG00000007797	ITGAL
ENSSSCT00000045086	1.94705	0.554361	0.000340668	0.0127953	MC-HFD vs.Control	protein_coding	ENSSSCG00000015328	SGCE
ENSSSCT00000079937	-1.22372	1.50195	0.000353311	0.0129569	MC-HFD vs.Control	protein_coding	ENSSSCG00000012324	IQSEC2
ENSSSCT00000019450	-1.54977	-0.302964	0.000353471	0.0129569	MC-HFD vs.Control	protein_coding	ENSSSCG00000017874	ATP2A3
ENSSSCT00000077714	-1.10947	3.40704	0.000355644	0.0129998	MC-HFD vs.Control	lncRNA	ENSSSCG00000045832	NA
ENSSSCT00000000743	-1.4476	2.34612	0.000358441	0.0130103	MC-HFD vs.Control	protein_coding	ENSSSCG00000000682	GNB3
ENSSSCT00000005170	1.62445	4.50363	0.000356697	0.0130103	MC-HFD vs.Control	protein_coding	ENSSSCG00000051899	B2M
ENSSSCT00000066641	-1.00383	1.52827	0.000368648	0.0132404	MC-HFD vs.Control	protein_coding	ENSSSCG00000014450	TCOF1
ENSSSCT00000074297	1.95003	5.32662	0.000368867	0.0132404	MC-HFD vs.Control	protein_coding	ENSSSCG00000039573	SLPI
ENSSSCT00000010927	-1.05571	1.42144	0.000377837	0.0134506	MC-HFD vs.Control	protein_coding	ENSSSCG00000009971	ZNRF3
ENSSSCT00000059505	1.36079	1.02923	0.000383603	0.0135442	MC-HFD vs.Control	protein_coding	ENSSSCG00000008986	SEPTIN11
ENSSSCT00000089331	-1.09315	3.90336	0.000390346	0.0137164	MC-HFD vs.Control	protein_coding	ENSSSCG00000050318	SMIM35
ENSSSCT00000096008	-1.20233	1.22736	0.000400022	0.0138967	MC-HFD vs.Control	lncRNA	ENSSSCG00000054166	NA
ENSSSCT00000054061	-1.02039	0.911607	0.000403347	0.0139375	MC-HFD vs.Control	protein_coding	ENSSSCG00000040264	CLASRP
ENSSSCT00000101704	1.23058	7.52089	0.000403234	0.0139375	MC-HFD vs.Control	snRNA	ENSSSCG00000056457	U2
ENSSSCT00000061206	-1.19698	6.50617	0.000406067	0.0139942	MC-HFD vs.Control	protein_coding	ENSSSCG00000025117	ATN1
ENSSSCT00000051946	-1.05474	4.12518	0.000422109	0.0142812	MC-HFD vs.Control	protein_coding	ENSSSCG00000031715	CARD9
ENSSSCT00000057571	-1.54976	1.57636	0.000423358	0.0142861	MC-HFD vs.Control	protein_coding	ENSSSCG00000039135	ARHGAP33
ENSSSCT00000058221	-1.01832	2.19639	0.000423192	0.0142861	MC-HFD vs.Control	protein_coding	ENSSSCG00000013879	SLC27A1
ENSSSCT00000008501	-1.76622	4.31446	0.000425372	0.0143168	MC-HFD vs.Control	protein_coding	ENSSSCG00000007754	ITGAM
ENSSSCT00000044156	1.03565	3.50653	0.000430586	0.0144735	MC-HFD vs.Control	protein_coding	ENSSSCG00000039196	POLR2I
ENSSSCT00000062920	1.02429	1.90076	0.00043936	0.0146544	MC-HFD vs.Control	protein_coding	ENSSSCG00000003708	ANKRD29
ENSSSCT00000020486	1.45723	3.32411	0.000455717	0.0149535	MC-HFD vs.Control	snoRNA	ENSSSCG00000018891	SNORA74
ENSSSCT00000073459	-1.4002	3.6013	0.000458895	0.0150161	MC-HFD vs.Control	protein_coding	ENSSSCG00000030361	PRKCZ
ENSSSCT00000067704	-1.66678	2.77803	0.000464899	0.0151327	MC-HFD vs.Control	lncRNA	ENSSSCG00000051633	NA
ENSSSCT00000102254	-1.83335	4.29232	0.000471446	0.0152307	MC-HFD vs.Control	protein_coding	ENSSSCG00000026478	PADI2
ENSSSCT00000072620	-1.26072	5.25785	0.00047631	0.0153342	MC-HFD vs.Control	protein_coding	ENSSSCG00000036612	TNFAIP2
ENSSSCT00000012791	1.29122	7.20741	0.000485755	0.0155226	MC-HFD vs.Control	protein_coding	ENSSSCG00000011683	PCOLCE2
ENSSSCT00000010444	2.50696	3.51938	0.000488927	0.0155473	MC-HFD vs.Control	protein_coding	ENSSSCG00000009526	ITGBL1
ENSSSCT00000091630	1.4834	0.513797	0.000489595	0.0155495	MC-HFD vs.Control	protein_coding	ENSSSCG00000006824	GNAI3
ENSSSCT00000042959	1.25897	4.59786	0.000508126	0.0158658	MC-HFD vs.Control	protein_coding	ENSSSCG00000038826	NDUFV2
ENSSSCT00000103850	1.10036	0.720626	0.000512521	0.0158692	MC-HFD vs.Control	protein_coding	ENSSSCG00000014881	CLNS1A
ENSSSCT00000078023	1.24792	4.17481	0.000511854	0.0158692	MC-HFD vs.Control	protein_coding	ENSSSCG00000039494	NDUFC2
ENSSSCT00000018717	-1.25281	5.6022	0.000510301	0.0158692	MC-HFD vs.Control	protein_coding	ENSSSCG00000017192	NA
ENSSSCT00000032096	-1.63742	0.915992	0.000521512	0.0160397	MC-HFD vs.Control	protein_coding	ENSSSCG00000000382	SMARCC2
ENSSSCT00000049821	-1.20985	0.811414	0.0005213	0.0160397	MC-HFD vs.Control	protein_coding	ENSSSCG00000034841	RGS19
ENSSSCT00000038268	1.10451	2.48397	0.000532009	0.0161636	MC-HFD vs.Control	protein_coding	ENSSSCG00000033842	CFDP1
ENSSSCT00000029807	1.04176	2.18857	0.00053308	0.0161772	MC-HFD vs.Control	protein_coding	ENSSSCG00000023719	IFT20
ENSSSCT00000091718	-1.14892	1.71307	0.000536203	0.016215	MC-HFD vs.Control	lncRNA	ENSSSCG00000060852	NA
ENSSSCT00000075095	1.10875	1.82914	0.000536912	0.0162175	MC-HFD vs.Control	protein_coding	ENSSSCG00000036385	BET1
ENSSSCT00000091203	1.20862	1.82821	0.000543231	0.0162624	MC-HFD vs.Control	protein_coding	ENSSSCG00000009699	HPGD
ENSSSCT00000084827	-2.50954	1.25208	0.000540874	0.0162624	MC-HFD vs.Control	protein_coding	ENSSSCG00000029414	NA
ENSSSCT00000045165	-1.23037	1.48265	0.000550294	0.0163348	MC-HFD vs.Control	protein_coding	ENSSSCG00000038967	NADK
ENSSSCT00000083024	-1.4198	0.717017	0.000549414	0.0163348	MC-HFD vs.Control	protein_coding	ENSSSCG00000022506	COL6A1
ENSSSCT00000098333	-1.25254	0.926081	0.000555942	0.0163725	MC-HFD vs.Control	lncRNA	ENSSSCG00000056385	NA
ENSSSCT00000011281	1.16279	1.90998	0.000558388	0.016412	MC-HFD vs.Control	protein_coding	ENSSSCG00000010308	CHCHD1
ENSSSCT00000101680	-1.51341	0.976173	0.000565495	0.016541	MC-HFD vs.Control	lncRNA	ENSSSCG00000058370	NA
ENSSSCT00000000845	1.28718	5.88348	0.000577461	0.0167026	MC-HFD vs.Control	protein_coding	ENSSSCG00000000781	ABCD2
ENSSSCT00000003581	-1.00709	1.98423	0.000581239	0.0167165	MC-HFD vs.Control	protein_coding	ENSSSCG00000003222	SYT3
ENSSSCT00000024125	3.49361	-0.72447	0.000581815	0.0167165	MC-HFD vs.Control	protein_coding	ENSSSCG00000020715	GOLGA7
ENSSSCT00000083068	1.95715	1.31852	0.000582824	0.016727	MC-HFD vs.Control	protein_coding	ENSSSCG00000005656	NA
ENSSSCT00000014166	1.4435	2.57983	0.000584782	0.0167304	MC-HFD vs.Control	protein_coding	ENSSSCG00000012960	CST6
ENSSSCT00000031428	-1.01762	3.04537	0.000587113	0.016754	MC-HFD vs.Control	protein_coding	ENSSSCG00000024018	SLC16A3
ENSSSCT00000069897	-1.14547	4.98711	0.000589583	0.016754	MC-HFD vs.Control	protein_coding	ENSSSCG00000010278	NA
ENSSSCT00000029874	1.25508	5.38755	0.000589322	0.016754	MC-HFD vs.Control	protein_coding	ENSSSCG00000027072	ATP5IF1
ENSSSCT00000063285	1.07209	7.82425	0.00059047	0.0167608	MC-HFD vs.Control	protein_coding	ENSSSCG00000040325	COX7C
ENSSSCT00000038381	-1.05802	4.26203	0.000593717	0.0167996	MC-HFD vs.Control	protein_coding	ENSSSCG00000011125	GATA3
ENSSSCT00000050644	-1.08872	0.76859	0.000595497	0.0168298	MC-HFD vs.Control	protein_coding	ENSSSCG00000034854	SEC16A
ENSSSCT00000103924	-1.21793	0.71129	0.000617296	0.0171248	MC-HFD vs.Control	protein_coding	ENSSSCG00000022553	TNRC18
ENSSSCT00000038299	1.04276	3.48972	0.000617831	0.0171248	MC-HFD vs.Control	protein_coding	ENSSSCG00000038329	PIGK
ENSSSCT00000013696	1.02112	0.869211	0.000621816	0.0171985	MC-HFD vs.Control	protein_coding	ENSSSCG00000012527	TCEAL9
ENSSSCT00000049241	1.06345	3.6914	0.000626622	0.0172279	MC-HFD vs.Control	protein_coding	ENSSSCG00000011893	COX17
ENSSSCT00000035108	1.19641	4.43232	0.00062849	0.0172279	MC-HFD vs.Control	protein_coding	ENSSSCG00000005976	NDUFB9
ENSSSCT00000101501	1.11161	5.63948	0.000624985	0.0172279	MC-HFD vs.Control	protein_coding	ENSSSCG00000056174	ZNF706
ENSSSCT00000024998	-1.38068	-0.460856	0.000623783	0.0172279	MC-HFD vs.Control	protein_coding	ENSSSCG00000028139	CCDC154
ENSSSCT00000002927	-1.63014	-0.702718	0.000629209	0.0172279	MC-HFD vs.Control	protein_coding	ENSSSCG00000002637	DBNDD1
ENSSSCT00000067296	-1.34316	0.0384673	0.000635725	0.0172337	MC-HFD vs.Control	protein_coding	ENSSSCG00000062536	SHANK1
ENSSSCT00000069031	-1.86746	-0.715471	0.00063428	0.0172337	MC-HFD vs.Control	protein_coding	ENSSSCG00000035933	MAPK15
ENSSSCT00000058938	-1.3691	2.60566	0.000641657	0.0173401	MC-HFD vs.Control	protein_coding	ENSSSCG00000011186	COL6A5
ENSSSCT00000000098	-1.71864	5.40095	0.00064435	0.0173692	MC-HFD vs.Control	protein_coding	ENSSSCG00000000092	NPTXR
ENSSSCT00000021363	1.98583	0.160883	0.000652558	0.0174888	MC-HFD vs.Control	snRNA	ENSSSCG00000019768	U12
ENSSSCT00000020294	1.25085	5.61262	0.000658471	0.0175559	MC-HFD vs.Control	snoRNA	ENSSSCG00000018699	SNORA38
ENSSSCT00000042281	1.15286	5.69672	0.000664431	0.0176051	MC-HFD vs.Control	protein_coding	ENSSSCG00000035736	NA
ENSSSCT00000043951	-1.14566	2.63455	0.000667869	0.0176124	MC-HFD vs.Control	protein_coding	ENSSSCG00000026326	CCNF
ENSSSCT00000097690	-1.02072	1.92313	0.000668042	0.0176124	MC-HFD vs.Control	lncRNA	ENSSSCG00000060516	NA
ENSSSCT00000095665	1.16441	2.80143	0.00067135	0.0176529	MC-HFD vs.Control	protein_coding	ENSSSCG00000051892	GON7
ENSSSCT00000022513	-1.62711	0.691248	0.000671623	0.0176529	MC-HFD vs.Control	protein_coding	ENSSSCG00000021911	NDRG4
ENSSSCT00000055038	-1.56692	-0.389019	0.000673077	0.0176624	MC-HFD vs.Control	protein_coding	ENSSSCG00000008026	CRAMP1
ENSSSCT00000036462	-1.52449	0.578815	0.00068309	0.0177424	MC-HFD vs.Control	protein_coding	ENSSSCG00000013775	ADGRE5
ENSSSCT00000013274	1.461	3.72642	0.000678179	0.0177424	MC-HFD vs.Control	protein_coding	ENSSSCG00000012135	VEGFD
ENSSSCT00000086280	-1.23911	0.0911278	0.000683241	0.0177424	MC-HFD vs.Control	protein_coding	ENSSSCG00000017238	TTYH2
ENSSSCT00000071261	1.04702	2.44152	0.000689166	0.0178248	MC-HFD vs.Control	protein_coding	ENSSSCG00000006306	MPZL1
ENSSSCT00000058659	1.00233	2.93872	0.000693134	0.0178561	MC-HFD vs.Control	protein_coding	ENSSSCG00000039618	COX20
ENSSSCT00000028385	2.20224	-1.11488	0.000701677	0.0180108	MC-HFD vs.Control	protein_coding	ENSSSCG00000016565	ZC3HC1
ENSSSCT00000063094	-1.0946	3.47752	0.000703658	0.0180198	MC-HFD vs.Control	protein_coding	ENSSSCG00000036801	C6orf132
ENSSSCT00000043093	-1.76617	-0.0740891	0.000713628	0.0181495	MC-HFD vs.Control	protein_coding	ENSSSCG00000032986	AKAP17A
ENSSSCT00000057191	-1.62622	0.490279	0.000717671	0.018176	MC-HFD vs.Control	protein_coding	ENSSSCG00000040095	GPR35
ENSSSCT00000072336	-2.23608	-0.168943	0.000721418	0.0182403	MC-HFD vs.Control	lncRNA	ENSSSCG00000046185	NA
ENSSSCT00000026993	-1.21678	1.0347	0.000733663	0.0184598	MC-HFD vs.Control	protein_coding	ENSSSCG00000029635	GRIN3B
ENSSSCT00000102142	-1.01947	5.57244	0.00073463	0.0184625	MC-HFD vs.Control	pseudogene	ENSSSCG00000052857	NA
ENSSSCT00000081063	1.45138	5.31056	0.000736238	0.0184708	MC-HFD vs.Control	protein_coding	ENSSSCG00000031712	MFAP5
ENSSSCT00000019634	-1.3067	-0.122435	0.000749381	0.0186203	MC-HFD vs.Control	protein_coding	ENSSSCG00000018039	NCOR1
ENSSSCT00000051391	1.00956	4.3803	0.000761213	0.0188585	MC-HFD vs.Control	protein_coding	ENSSSCG00000016893	NDUFS4
ENSSSCT00000035256	2.28102	1.26507	0.000772137	0.0190397	MC-HFD vs.Control	protein_coding	ENSSSCG00000009046	NA
ENSSSCT00000065594	-1.32112	0.219994	0.000783939	0.0191583	MC-HFD vs.Control	protein_coding	ENSSSCG00000038766	MAD1L1
ENSSSCT00000065507	-1.09089	0.686019	0.000792686	0.0192889	MC-HFD vs.Control	protein_coding	ENSSSCG00000005486	KIF12
ENSSSCT00000003469	-1.3865	0.182196	0.000792843	0.0192889	MC-HFD vs.Control	protein_coding	ENSSSCG00000003128	LIG1
ENSSSCT00000050181	2.87646	4.71582	0.00079416	0.0192889	MC-HFD vs.Control	protein_coding	ENSSSCG00000023333	FCN2
ENSSSCT00000037388	-1.55886	-0.367939	0.000794225	0.0192889	MC-HFD vs.Control	protein_coding	ENSSSCG00000038220	RXRA
ENSSSCT00000059357	-1.00981	0.886218	0.000798619	0.0193069	MC-HFD vs.Control	protein_coding	ENSSSCG00000037174	ASMTL
ENSSSCT00000041398	-1.72524	-0.289342	0.000803797	0.0193419	MC-HFD vs.Control	protein_coding	ENSSSCG00000003040	ARHGEF1
ENSSSCT00000019355	-1.00548	1.6315	0.000806285	0.0193479	MC-HFD vs.Control	protein_coding	ENSSSCG00000017783	MYO18A
ENSSSCT00000011983	1.19482	5.35087	0.000808269	0.0193678	MC-HFD vs.Control	protein_coding	ENSSSCG00000010948	CTSL
ENSSSCT00000031793	-1.16644	1.02696	0.000812255	0.0193979	MC-HFD vs.Control	protein_coding	ENSSSCG00000042718	GNAT1
ENSSSCT00000055228	-2.36427	-1.42843	0.000822592	0.0194888	MC-HFD vs.Control	lncRNA	ENSSSCG00000040330	NA
ENSSSCT00000103550	-1.11872	0.26582	0.000820811	0.0194888	MC-HFD vs.Control	lncRNA	ENSSSCG00000062256	NA
ENSSSCT00000012444	1.03014	4.96231	0.000833181	0.0195833	MC-HFD vs.Control	protein_coding	ENSSSCG00000011366	SLC25A20
ENSSSCT00000077979	-2.96324	-2.04515	0.000833475	0.0195833	MC-HFD vs.Control	protein_coding	ENSSSCG00000005786	SNRPA1
ENSSSCT00000000980	1.03299	4.704	0.000845112	0.0197507	MC-HFD vs.Control	protein_coding	ENSSSCG00000000896	NTN4
ENSSSCT00000040586	-2.01402	2.10542	0.000861053	0.0199807	MC-HFD vs.Control	protein_coding	ENSSSCG00000013556	NA
ENSSSCT00000048624	1.02708	1.5665	0.000879328	0.0201782	MC-HFD vs.Control	protein_coding	ENSSSCG00000032973	NA
ENSSSCT00000062643	-1.21773	6.56923	0.000881104	0.0201782	MC-HFD vs.Control	protein_coding	ENSSSCG00000013078	NA
ENSSSCT00000011739	1.05163	7.33477	0.000889674	0.0201898	MC-HFD vs.Control	protein_coding	ENSSSCG00000010728	CPXM2
ENSSSCT00000025514	1.47475	5.25255	0.000897547	0.0202268	MC-HFD vs.Control	pseudogene	ENSSSCG00000024917	NA
ENSSSCT00000074309	1.00827	4.95249	0.00092139	0.0204266	MC-HFD vs.Control	protein_coding	ENSSSCG00000011003	NDUFB6
ENSSSCT00000044528	-1.50991	-0.866976	0.000920795	0.0204266	MC-HFD vs.Control	protein_coding	ENSSSCG00000007939	ANKS3
ENSSSCT00000014255	-1.05856	1.2725	0.000922665	0.0204374	MC-HFD vs.Control	protein_coding	ENSSSCG00000013042	NA
ENSSSCT00000074984	1.15835	2.82106	0.000930281	0.0205885	MC-HFD vs.Control	lncRNA	ENSSSCG00000044696	NA
ENSSSCT00000056865	-2.41587	3.51714	0.000948274	0.020809	MC-HFD vs.Control	protein_coding	ENSSSCG00000036461	CACNG5
ENSSSCT00000000284	-1.26732	2.63198	0.000959346	0.0209103	MC-HFD vs.Control	protein_coding	ENSSSCG00000000265	ESPL1
ENSSSCT00000063352	1.59539	1.39517	0.000969417	0.0210204	MC-HFD vs.Control	protein_coding	ENSSSCG00000038643	KLF11
ENSSSCT00000026250	1.07099	1.27838	0.000975926	0.0210204	MC-HFD vs.Control	protein_coding	ENSSSCG00000011620	RUVBL1
ENSSSCT00000040244	-1.55431	0.0128671	0.000976925	0.0210204	MC-HFD vs.Control	protein_coding	ENSSSCG00000024633	JAKMIP3
ENSSSCT00000055170	-1.43923	3.95633	0.00097737	0.0210204	MC-HFD vs.Control	protein_coding	ENSSSCG00000023762	TRPM2
ENSSSCT00000106153	3.48192	-1.06005	0.000982856	0.0210882	MC-HFD vs.Control	protein_coding	ENSSSCG00000002280	RAB15
ENSSSCT00000064575	-1.33508	-0.675721	0.000994321	0.0211567	MC-HFD vs.Control	protein_coding	ENSSSCG00000000075	NA
ENSSSCT00000084513	-1.60787	0.00937403	0.000998009	0.0211855	MC-HFD vs.Control	protein_coding	ENSSSCG00000007463	PTGIS
ENSSSCT00000094972	4.03239	0.737131	0.00102715	0.0214388	MC-HFD vs.Control	protein_coding	ENSSSCG00000003153	FTL
ENSSSCT00000076216	-2.24731	-1.26907	0.00102398	0.0214388	MC-HFD vs.Control	protein_coding	ENSSSCG00000000119	EIF3L
ENSSSCT00000053141	1.09858	1.83534	0.00103805	0.0214545	MC-HFD vs.Control	protein_coding	ENSSSCG00000037483	RFTN2
ENSSSCT00000027469	1.73353	0.208977	0.00103242	0.0214545	MC-HFD vs.Control	snoRNA	ENSSSCG00000025722	SNORA71
ENSSSCT00000088619	-1.71328	0.496917	0.0010411	0.0214647	MC-HFD vs.Control	lncRNA	ENSSSCG00000048831	NA
ENSSSCT00000023653	-1.2111	0.660922	0.00105316	0.0216072	MC-HFD vs.Control	protein_coding	ENSSSCG00000021917	HIPK4
ENSSSCT00000041979	-1.23609	1.35321	0.00105988	0.0216452	MC-HFD vs.Control	protein_coding	ENSSSCG00000034379	MAP2K3
ENSSSCT00000018096	1.09791	2.05507	0.00106504	0.021703	MC-HFD vs.Control	protein_coding	ENSSSCG00000021652	LSM8
ENSSSCT00000050912	-1.73993	4.28232	0.00106757	0.0217167	MC-HFD vs.Control	protein_coding	ENSSSCG00000039798	SLC11A1
ENSSSCT00000058577	1.44279	1.71314	0.00106995	0.0217432	MC-HFD vs.Control	protein_coding	ENSSSCG00000032380	C1orf53
ENSSSCT00000008361	1.12008	5.76895	0.00107055	0.0217432	MC-HFD vs.Control	protein_coding	ENSSSCG00000034019	NA
ENSSSCT00000060358	1.0386	2.22287	0.00107906	0.0218381	MC-HFD vs.Control	protein_coding	ENSSSCG00000008414	ERLEC1
ENSSSCT00000054591	-1.453	-0.29478	0.00109388	0.0220442	MC-HFD vs.Control	protein_coding	ENSSSCG00000037719	PDPK1
ENSSSCT00000024086	-1.78908	2.8081	0.00109504	0.0220505	MC-HFD vs.Control	protein_coding	ENSSSCG00000036948	NA
ENSSSCT00000002138	-3.29613	-1.59027	0.00111574	0.0223285	MC-HFD vs.Control	protein_coding	ENSSSCG00000001909	STRA6
ENSSSCT00000002773	-1.20678	-0.254537	0.00111717	0.02234	MC-HFD vs.Control	protein_coding	ENSSSCG00000002495	SYNE3
ENSSSCT00000089062	-1.01279	1.33686	0.00112427	0.0223902	MC-HFD vs.Control	protein_coding	ENSSSCG00000003941	SZT2
ENSSSCT00000018462	-1.08207	1.02719	0.00114023	0.0225574	MC-HFD vs.Control	protein_coding	ENSSSCG00000016954	ERBIN
ENSSSCT00000054838	-1.08465	3.28437	0.00114215	0.0225609	MC-HFD vs.Control	protein_coding	ENSSSCG00000011610	NUP210
ENSSSCT00000031549	1.28727	-0.575527	0.00114862	0.0226001	MC-HFD vs.Control	misc_RNA	ENSSSCG00000029693	Metazoa_SRP
ENSSSCT00000078375	-1.84129	-1.0512	0.00114961	0.0226001	MC-HFD vs.Control	protein_coding	ENSSSCG00000031788	PTAFR
ENSSSCT00000089375	1.21509	-0.551728	0.00117849	0.0229292	MC-HFD vs.Control	lncRNA	ENSSSCG00000044461	NA
ENSSSCT00000086207	-2.78255	1.15235	0.00119087	0.0231008	MC-HFD vs.Control	protein_coding	ENSSSCG00000029414	NA
ENSSSCT00000048104	1.68965	0.952338	0.00120034	0.023182	MC-HFD vs.Control	protein_coding	ENSSSCG00000006203	COPS5
ENSSSCT00000019121	-1.25585	0.212723	0.00120193	0.023182	MC-HFD vs.Control	protein_coding	ENSSSCG00000017566	ACSF2
ENSSSCT00000060874	1.1296	4.0854	0.0012114	0.0232819	MC-HFD vs.Control	protein_coding	ENSSSCG00000037869	NDUFA5
ENSSSCT00000087249	-1.42634	-0.534422	0.00121358	0.0232819	MC-HFD vs.Control	protein_coding	ENSSSCG00000048169	NA
ENSSSCT00000016615	-2.64995	-0.854335	0.0012174	0.0233358	MC-HFD vs.Control	protein_coding	ENSSSCG00000015246	ST14
ENSSSCT00000030280	-1.01259	1.80458	0.00121997	0.0233507	MC-HFD vs.Control	protein_coding	ENSSSCG00000030513	CFAP74
ENSSSCT00000029353	-1.39761	5.59048	0.00122705	0.0234515	MC-HFD vs.Control	protein_coding	ENSSSCG00000026302	NA
ENSSSCT00000027411	-1.1878	1.20708	0.00122842	0.0234576	MC-HFD vs.Control	protein_coding	ENSSSCG00000021944	RAC2
ENSSSCT00000081106	2.13188	3.63602	0.0012312	0.0234608	MC-HFD vs.Control	protein_coding	ENSSSCG00000015426	RELN
ENSSSCT00000080871	-3.64459	-1.05315	0.00123615	0.0235099	MC-HFD vs.Control	protein_coding	ENSSSCG00000007171	EBF4
ENSSSCT00000030404	1.09504	2.95124	0.00124446	0.0235518	MC-HFD vs.Control	protein_coding	ENSSSCG00000039619	PIN1
ENSSSCT00000074447	2.26141	1.38536	0.00126231	0.023709	MC-HFD vs.Control	protein_coding	ENSSSCG00000000253	KRT18
ENSSSCT00000006176	-1.02571	1.65384	0.00127741	0.0238296	MC-HFD vs.Control	protein_coding	ENSSSCG00000005616	TTC16
ENSSSCT00000029647	-1.12643	4.15274	0.00127809	0.0238296	MC-HFD vs.Control	protein_coding	ENSSSCG00000025133	ITGB2
ENSSSCT00000030633	1.32123	1.85342	0.00128422	0.0238696	MC-HFD vs.Control	snoRNA	ENSSSCG00000028807	SNORA16A
ENSSSCT00000035199	1.11449	1.4083	0.00128968	0.0239422	MC-HFD vs.Control	protein_coding	ENSSSCG00000012811	VBP1
ENSSSCT00000014468	-1.32319	5.67754	0.00129119	0.023953	MC-HFD vs.Control	protein_coding	ENSSSCG00000013248	LRP4
ENSSSCT00000079749	1.55162	2.64559	0.0013062	0.0241107	MC-HFD vs.Control	protein_coding	ENSSSCG00000016019	NCKAP1
ENSSSCT00000056275	-1.13701	5.25086	0.00131607	0.0241895	MC-HFD vs.Control	protein_coding	ENSSSCG00000033909	NA
ENSSSCT00000066777	-1.78977	-0.868685	0.00132389	0.0243161	MC-HFD vs.Control	protein_coding	ENSSSCG00000009975	EMID1
ENSSSCT00000045100	-1.58188	-0.339216	0.00132589	0.0243182	MC-HFD vs.Control	protein_coding	ENSSSCG00000031361	CELSR1
ENSSSCT00000085347	-2.31702	0.376214	0.00133126	0.0243823	MC-HFD vs.Control	lncRNA	ENSSSCG00000042107	NA
ENSSSCT00000014548	1.23466	0.36202	0.00134071	0.0244399	MC-HFD vs.Control	protein_coding	ENSSSCG00000013322	IMMP1L
ENSSSCT00000071255	1.02507	3.63683	0.00133864	0.0244399	MC-HFD vs.Control	protein_coding	ENSSSCG00000012817	FUNDC2
ENSSSCT00000102258	-1.77409	-0.382988	0.00134811	0.0245349	MC-HFD vs.Control	lncRNA	ENSSSCG00000053744	NA
ENSSSCT00000018725	-1.03094	2.01072	0.00135533	0.0246316	MC-HFD vs.Control	protein_coding	ENSSSCG00000017200	UNC13D
ENSSSCT00000073214	-1.30783	7.84389	0.0013632	0.0247227	MC-HFD vs.Control	protein_coding	ENSSSCG00000036135	COL1A1
ENSSSCT00000044977	2.3399	-0.0430702	0.00137725	0.0248648	MC-HFD vs.Control	protein_coding	ENSSSCG00000055794	NA
ENSSSCT00000090454	1.16621	0.236456	0.00138568	0.0249211	MC-HFD vs.Control	protein_coding	ENSSSCG00000059095	MLF1
ENSSSCT00000012274	1.17251	2.00994	0.00140031	0.0250451	MC-HFD vs.Control	protein_coding	ENSSSCG00000011208	ZNF385D
ENSSSCT00000056926	1.33661	0.283145	0.00140449	0.0251026	MC-HFD vs.Control	protein_coding	ENSSSCG00000010083	PPIL2
ENSSSCT00000040910	-1.04978	1.09933	0.00141134	0.025122	MC-HFD vs.Control	protein_coding	ENSSSCG00000001912	PML
ENSSSCT00000101887	1.42613	1.9267	0.00141527	0.025122	MC-HFD vs.Control	protein_coding	ENSSSCG00000058178	NA
ENSSSCT00000034776	-1.48404	1.80239	0.00141356	0.025122	MC-HFD vs.Control	protein_coding	ENSSSCG00000002720	NA
ENSSSCT00000031246	-1.00677	0.327148	0.00141399	0.025122	MC-HFD vs.Control	protein_coding	ENSSSCG00000028185	FGD3
ENSSSCT00000029569	1.50823	0.124925	0.00141713	0.0251378	MC-HFD vs.Control	protein_coding	ENSSSCG00000031311	NA
ENSSSCT00000032217	-1.88467	0.0615307	0.00141935	0.02516	MC-HFD vs.Control	protein_coding	ENSSSCG00000021569	MMP25
ENSSSCT00000090470	-1.17503	1.24922	0.00142722	0.0251943	MC-HFD vs.Control	lncRNA	ENSSSCG00000055583	NA
ENSSSCT00000013133	-1.37833	1.61823	0.00143255	0.0252385	MC-HFD vs.Control	protein_coding	ENSSSCG00000012002	ROBO2
ENSSSCT00000001749	1.83155	8.01539	0.00144547	0.0253805	MC-HFD vs.Control	protein_coding	ENSSSCG00000001570	PI16
ENSSSCT00000033988	1.26262	0.495051	0.00145853	0.0254284	MC-HFD vs.Control	protein_coding	ENSSSCG00000012336	GNL3L
ENSSSCT00000061106	-1.21895	-0.240875	0.00146051	0.0254356	MC-HFD vs.Control	protein_coding	ENSSSCG00000038262	SNAPC4
ENSSSCT00000022128	1.26996	1.42808	0.0014708	0.0255222	MC-HFD vs.Control	snoRNA	ENSSSCG00000020533	SNORA2C
ENSSSCT00000031663	-1.61921	-0.327219	0.00147418	0.025555	MC-HFD vs.Control	protein_coding	ENSSSCG00000022068	GNG8
ENSSSCT00000092539	-1.24939	-0.0452152	0.00147536	0.0255584	MC-HFD vs.Control	protein_coding	ENSSSCG00000024895	GGA1
ENSSSCT00000088326	1.38574	3.57445	0.00149998	0.0258467	MC-HFD vs.Control	protein_coding	ENSSSCG00000002444	FBLN5
ENSSSCT00000101014	-1.36147	2.25636	0.00152139	0.0260166	MC-HFD vs.Control	lncRNA	ENSSSCG00000055748	NA
ENSSSCT00000041870	1.06597	1.07868	0.00153191	0.0260919	MC-HFD vs.Control	protein_coding	ENSSSCG00000033788	OXLD1
ENSSSCT00000045158	1.12895	1.30118	0.00153992	0.0261182	MC-HFD vs.Control	protein_coding	ENSSSCG00000028338	PAMR1
ENSSSCT00000030693	1.15821	1.5243	0.00153891	0.0261182	MC-HFD vs.Control	protein_coding	ENSSSCG00000025107	MIX23
ENSSSCT00000010075	2.75317	0.434624	0.00153986	0.0261182	MC-HFD vs.Control	protein_coding	ENSSSCG00000009202	MMRN1
ENSSSCT00000092916	1.45025	1.25423	0.00155326	0.0262007	MC-HFD vs.Control	snRNA	ENSSSCG00000059821	U1
ENSSSCT00000032057	1.10866	2.53039	0.00155635	0.0262182	MC-HFD vs.Control	protein_coding	ENSSSCG00000057970	PLBD1
ENSSSCT00000031703	-1.12108	3.73446	0.00156255	0.0262562	MC-HFD vs.Control	protein_coding	ENSSSCG00000059476	NA
ENSSSCT00000082990	-1.18083	5.17545	0.00156325	0.0262562	MC-HFD vs.Control	protein_coding	ENSSSCG00000003514	HSPG2
ENSSSCT00000106219	1.19169	0.708403	0.00156596	0.0262846	MC-HFD vs.Control	protein_coding	ENSSSCG00000056865	OST4
ENSSSCT00000032887	1.89994	1.46039	0.00158422	0.0265224	MC-HFD vs.Control	protein_coding	ENSSSCG00000012699	FHL1
ENSSSCT00000052589	1.04733	1.33533	0.00159085	0.0265819	MC-HFD vs.Control	protein_coding	ENSSSCG00000011085	MLLT10
ENSSSCT00000068404	1.17773	1.49358	0.0016037	0.0266201	MC-HFD vs.Control	protein_coding	ENSSSCG00000062892	ANP32B
ENSSSCT00000038465	-1.80843	0.189729	0.00159752	0.0266201	MC-HFD vs.Control	protein_coding	ENSSSCG00000032092	DDX5
ENSSSCT00000027211	2.37155	-0.386314	0.00159737	0.0266201	MC-HFD vs.Control	snoRNA	ENSSSCG00000025513	SNORD22
ENSSSCT00000053482	1.30188	4.48603	0.00162684	0.0268713	MC-HFD vs.Control	protein_coding	ENSSSCG00000036007	MFAP4
ENSSSCT00000058148	-1.11593	7.27682	0.00163521	0.0269257	MC-HFD vs.Control	protein_coding	ENSSSCG00000015099	BCL9L
ENSSSCT00000044819	1.08239	1.41116	0.0016448	0.0269607	MC-HFD vs.Control	protein_coding	ENSSSCG00000033154	ARL6IP5
ENSSSCT00000022564	-1.05108	2.09362	0.00164442	0.0269607	MC-HFD vs.Control	protein_coding	ENSSSCG00000029096	HRH2
ENSSSCT00000020970	2.00877	1.37178	0.00168461	0.0272711	MC-HFD vs.Control	Y_RNA	ENSSSCG00000019375	Y_RNA
ENSSSCT00000053158	1.21776	4.73244	0.00168566	0.0272711	MC-HFD vs.Control	protein_coding	ENSSSCG00000055783	UQCRB
ENSSSCT00000053085	-1.5353	5.47308	0.00170311	0.0274367	MC-HFD vs.Control	lncRNA	ENSSSCG00000034087	NA
ENSSSCT00000009981	1.03498	4.69293	0.00170447	0.0274367	MC-HFD vs.Control	protein_coding	ENSSSCG00000009114	PRSS12
ENSSSCT00000055468	1.01905	4.27213	0.00175455	0.0279477	MC-HFD vs.Control	protein_coding	ENSSSCG00000032166	NA
ENSSSCT00000018015	1.0297	1.96501	0.00177917	0.0280977	MC-HFD vs.Control	protein_coding	ENSSSCG00000016545	CHCHD3
ENSSSCT00000099592	-1.02825	3.3643	0.00178023	0.0280977	MC-HFD vs.Control	lncRNA	ENSSSCG00000052820	NA
ENSSSCT00000068386	-3.12525	0.76963	0.00179204	0.0282154	MC-HFD vs.Control	protein_coding	ENSSSCG00000008953	CXCL8
ENSSSCT00000044739	-1.3092	2.72779	0.00181378	0.0285229	MC-HFD vs.Control	pseudogene	ENSSSCG00000033465	NA
ENSSSCT00000042087	1.37036	0.287518	0.0018373	0.0286265	MC-HFD vs.Control	protein_coding	ENSSSCG00000015073	TAGLN
ENSSSCT00000043891	-1.23572	0.460762	0.00185013	0.028677	MC-HFD vs.Control	protein_coding	ENSSSCG00000034551	SCX
ENSSSCT00000008289	-1.24768	3.79103	0.00185223	0.0286779	MC-HFD vs.Control	protein_coding	ENSSSCG00000007557	MICALL2
ENSSSCT00000069885	-1.72373	-0.29447	0.00186055	0.028712	MC-HFD vs.Control	lncRNA	ENSSSCG00000044226	NA
ENSSSCT00000066326	-1.31541	0.762364	0.00186236	0.028712	MC-HFD vs.Control	protein_coding	ENSSSCG00000003040	ARHGEF1
ENSSSCT00000067328	1.03823	1.083	0.00193099	0.0292823	MC-HFD vs.Control	protein_coding	ENSSSCG00000027941	LSAMP
ENSSSCT00000081555	-1.00489	1.90795	0.00193248	0.0292878	MC-HFD vs.Control	protein_coding	ENSSSCG00000012269	CDK16
ENSSSCT00000093766	2.47691	10.3424	0.0019653	0.0295948	MC-HFD vs.Control	misc_RNA	ENSSSCG00000057267	Metazoa_SRP
ENSSSCT00000080694	-1.18594	1.67924	0.00198538	0.0297802	MC-HFD vs.Control	protein_coding	ENSSSCG00000002774	RIPOR1
ENSSSCT00000099926	-1.52405	3.71226	0.00199491	0.0298499	MC-HFD vs.Control	lncRNA	ENSSSCG00000058658	NA
ENSSSCT00000064967	1.2929	-0.124358	0.00201472	0.0300311	MC-HFD vs.Control	protein_coding	ENSSSCG00000037811	RNF34
ENSSSCT00000008745	-1.428	-0.665525	0.00202016	0.0300672	MC-HFD vs.Control	protein_coding	ENSSSCG00000007981	NPRL3
ENSSSCT00000029960	-1.60641	8.04232	0.00202516	0.0300941	MC-HFD vs.Control	protein_coding	ENSSSCG00000029944	FASN
ENSSSCT00000070536	-1.4321	-0.959293	0.00204974	0.0303376	MC-HFD vs.Control	lncRNA	ENSSSCG00000051278	NA
ENSSSCT00000024499	-1.30455	0.0609441	0.00205498	0.0303977	MC-HFD vs.Control	protein_coding	ENSSSCG00000028186	FBXL19
ENSSSCT00000089173	-1.8663	1.91499	0.00208605	0.0306301	MC-HFD vs.Control	protein_coding	ENSSSCG00000035997	RPL10
ENSSSCT00000019053	-1.02345	0.634465	0.00209954	0.0306713	MC-HFD vs.Control	protein_coding	ENSSSCG00000017500	TCAP
ENSSSCT00000018549	-1.54551	1.77074	0.00209873	0.0306713	MC-HFD vs.Control	protein_coding	ENSSSCG00000017036	CCNJL
ENSSSCT00000055037	-1.53195	5.72337	0.00209416	0.0306713	MC-HFD vs.Control	protein_coding	ENSSSCG00000055147	NA
ENSSSCT00000103953	-1.05279	0.867674	0.00211918	0.0307679	MC-HFD vs.Control	lncRNA	ENSSSCG00000052999	NA
ENSSSCT00000103764	-1.14749	1.50549	0.00212862	0.0308013	MC-HFD vs.Control	lncRNA	ENSSSCG00000059223	NA
ENSSSCT00000043439	-1.0983	1.54121	0.00218117	0.0311506	MC-HFD vs.Control	protein_coding	ENSSSCG00000008850	NA
ENSSSCT00000016710	1.00451	2.39218	0.002184	0.0311506	MC-HFD vs.Control	protein_coding	ENSSSCG00000015337	NA
ENSSSCT00000085083	-1.95961	-0.404344	0.00218882	0.0311619	MC-HFD vs.Control	lncRNA	ENSSSCG00000044930	NA
ENSSSCT00000089673	-1.07674	2.05569	0.00220447	0.0312756	MC-HFD vs.Control	lncRNA	ENSSSCG00000042639	NA
ENSSSCT00000094841	-1.99779	-0.902738	0.00221004	0.0313209	MC-HFD vs.Control	lncRNA	ENSSSCG00000054176	NA
ENSSSCT00000087196	1.27261	1.3836	0.00221391	0.0313209	MC-HFD vs.Control	protein_coding	ENSSSCG00000001085	DCDC2
ENSSSCT00000053561	1.45023	1.75683	0.00221358	0.0313209	MC-HFD vs.Control	protein_coding	ENSSSCG00000031649	RNASE1
ENSSSCT00000043867	-1.21532	-0.165982	0.00226605	0.0317513	MC-HFD vs.Control	protein_coding	ENSSSCG00000031125	AMPD2
ENSSSCT00000008204	-1.121	2.55716	0.0022706	0.0317513	MC-HFD vs.Control	protein_coding	ENSSSCG00000007495	CASS4
ENSSSCT00000035996	1.25912	4.20661	0.00227159	0.0317513	MC-HFD vs.Control	protein_coding	ENSSSCG00000006413	FCER1A
ENSSSCT00000059713	-1.66866	-1.0649	0.00229141	0.0318756	MC-HFD vs.Control	lncRNA	ENSSSCG00000040155	NA
ENSSSCT00000029139	-1.2689	1.66474	0.00230005	0.0318892	MC-HFD vs.Control	protein_coding	ENSSSCG00000026689	NA
ENSSSCT00000061089	-1.12741	-0.0168096	0.00230117	0.0318892	MC-HFD vs.Control	protein_coding	ENSSSCG00000034854	SEC16A
ENSSSCT00000104022	1.13629	0.0532495	0.00230346	0.0318892	MC-HFD vs.Control	protein_coding	ENSSSCG00000059295	PIGBOS1
ENSSSCT00000093239	-1.40653	-0.669396	0.00230207	0.0318892	MC-HFD vs.Control	protein_coding	ENSSSCG00000040103	NA
ENSSSCT00000029152	1.24734	8.20875	0.00229812	0.0318892	MC-HFD vs.Control	snRNA	ENSSSCG00000027405	U2
ENSSSCT00000078224	1.11921	0.868369	0.00231399	0.0319666	MC-HFD vs.Control	protein_coding	ENSSSCG00000000536	ERGIC2
ENSSSCT00000044867	1.1323	0.458732	0.00232465	0.0320115	MC-HFD vs.Control	protein_coding	ENSSSCG00000023562	SNRPE
ENSSSCT00000021229	1.02475	2.02797	0.00234005	0.0321552	MC-HFD vs.Control	snoRNA	ENSSSCG00000019634	SNORA49
ENSSSCT00000054554	-1.08089	6.09643	0.00235365	0.0322983	MC-HFD vs.Control	protein_coding	ENSSSCG00000037645	COTL1
ENSSSCT00000017506	1.38121	4.56478	0.00237036	0.0323999	MC-HFD vs.Control	protein_coding	ENSSSCG00000016078	HSPE1
ENSSSCT00000000979	1.01202	2.83896	0.00237487	0.0324179	MC-HFD vs.Control	protein_coding	ENSSSCG00000000895	SNRPF
ENSSSCT00000058553	-1.03661	3.24579	0.00237668	0.0324179	MC-HFD vs.Control	protein_coding	ENSSSCG00000033880	NA
ENSSSCT00000012707	-1.20494	1.76289	0.00241708	0.0327527	MC-HFD vs.Control	protein_coding	ENSSSCG00000011610	NUP210
ENSSSCT00000056262	-1.36102	4.42581	0.0024307	0.0328928	MC-HFD vs.Control	protein_coding	ENSSSCG00000020967	NA
ENSSSCT00000061968	-1.43944	1.87808	0.0024346	0.0329135	MC-HFD vs.Control	protein_coding	ENSSSCG00000039094	PLEC
ENSSSCT00000042621	-3.01572	1.86201	0.00244013	0.0329367	MC-HFD vs.Control	protein_coding	ENSSSCG00000037358	NA
ENSSSCT00000035939	-1.02929	0.27752	0.00245977	0.0331327	MC-HFD vs.Control	protein_coding	ENSSSCG00000003729	RNF125
ENSSSCT00000011625	-1.95939	4.69203	0.00246519	0.0331712	MC-HFD vs.Control	protein_coding	ENSSSCG00000010629	ADRA2A
ENSSSCT00000051285	-1.15592	2.90383	0.00247488	0.0332658	MC-HFD vs.Control	protein_coding	ENSSSCG00000013775	ADGRE5
ENSSSCT00000008270	-1.12557	5.69305	0.00247606	0.0332658	MC-HFD vs.Control	protein_coding	ENSSSCG00000007538	GATA5
ENSSSCT00000077069	1.48511	-0.627727	0.00248162	0.0332886	MC-HFD vs.Control	protein_coding	ENSSSCG00000022164	NA
ENSSSCT00000061939	1.24621	2.00038	0.00249074	0.0333195	MC-HFD vs.Control	protein_coding	ENSSSCG00000036403	FAM180A
ENSSSCT00000059253	-1.45536	2.81244	0.00250035	0.0333905	MC-HFD vs.Control	protein_coding	ENSSSCG00000009753	TMEM132C
ENSSSCT00000045730	1.23572	2.68923	0.00249984	0.0333905	MC-HFD vs.Control	lncRNA	ENSSSCG00000034567	NA
ENSSSCT00000050712	-1.4384	1.09385	0.00251336	0.0334718	MC-HFD vs.Control	protein_coding	ENSSSCG00000039094	PLEC
ENSSSCT00000002991	1.16257	1.54951	0.00252635	0.0335262	MC-HFD vs.Control	protein_coding	ENSSSCG00000002697	NUDT7
ENSSSCT00000100222	-1.26742	-0.832768	0.00252779	0.0335262	MC-HFD vs.Control	protein_coding	ENSSSCG00000039466	SCRIB
ENSSSCT00000041540	1.00564	4.90054	0.00255598	0.0337619	MC-HFD vs.Control	protein_coding	ENSSSCG00000034722	CCL14
ENSSSCT00000064174	1.41078	1.74134	0.00255847	0.0337775	MC-HFD vs.Control	snoRNA	ENSSSCG00000037470	SNORA70
ENSSSCT00000056350	-1.27044	2.46186	0.00256558	0.0338542	MC-HFD vs.Control	protein_coding	ENSSSCG00000039419	SLCO4A1
ENSSSCT00000099942	-1.88653	2.25856	0.00257229	0.0338924	MC-HFD vs.Control	lncRNA	ENSSSCG00000059688	NA
ENSSSCT00000050441	-1.02089	5.12907	0.0025706	0.0338924	MC-HFD vs.Control	protein_coding	ENSSSCG00000005975	MTSS1
ENSSSCT00000053227	-1.07114	7.36236	0.00257736	0.0338981	MC-HFD vs.Control	lncRNA	ENSSSCG00000048855	NA
ENSSSCT00000005819	-1.46845	0.621053	0.00260861	0.0340749	MC-HFD vs.Control	protein_coding	ENSSSCG00000005284	GNA14
ENSSSCT00000071263	-1.17434	3.78915	0.00260819	0.0340749	MC-HFD vs.Control	protein_coding	ENSSSCG00000044562	NA
ENSSSCT00000106722	-1.41912	1.28726	0.00261837	0.0341509	MC-HFD vs.Control	protein_coding	ENSSSCG00000031398	NA
ENSSSCT00000062657	-1.40655	1.14928	0.00261991	0.0341534	MC-HFD vs.Control	protein_coding	ENSSSCG00000002768	CENPT
ENSSSCT00000036076	-1.61109	7.66035	0.00263148	0.0342014	MC-HFD vs.Control	protein_coding	ENSSSCG00000036246	GP91-PHOX
ENSSSCT00000097731	-1.25888	-0.0104522	0.00263894	0.0342639	MC-HFD vs.Control	lncRNA	ENSSSCG00000062702	NA
ENSSSCT00000104903	-1.25851	0.40511	0.00265323	0.0343978	MC-HFD vs.Control	protein_coding	ENSSSCG00000039264	ABCA2
ENSSSCT00000061379	-1.74197	2.3928	0.00268746	0.0345821	MC-HFD vs.Control	protein_coding	ENSSSCG00000029960	LRRC4B
ENSSSCT00000106736	1.97178	0.191223	0.00273416	0.0350091	MC-HFD vs.Control	protein_coding	ENSSSCG00000033299	FLNA
ENSSSCT00000048735	1.20592	3.64086	0.00273721	0.0350309	MC-HFD vs.Control	protein_coding	ENSSSCG00000039046	NA
ENSSSCT00000001851	-1.18171	5.92634	0.00273936	0.0350411	MC-HFD vs.Control	protein_coding	ENSSSCG00000001660	PTK7
ENSSSCT00000066605	-3.16334	-1.31048	0.00276112	0.0352152	MC-HFD vs.Control	protein_coding	ENSSSCG00000015711	DPP10
ENSSSCT00000054823	-3.45803	-0.906536	0.0028018	0.0355764	MC-HFD vs.Control	protein_coding	ENSSSCG00000032135	NA
ENSSSCT00000018215	-1.69884	-0.80624	0.00285986	0.0359438	MC-HFD vs.Control	protein_coding	ENSSSCG00000016733	NA
ENSSSCT00000102168	-1.27672	7.1447	0.00286889	0.0360049	MC-HFD vs.Control	protein_coding	ENSSSCG00000001427	C4A
ENSSSCT00000025546	1.10023	3.05259	0.00288992	0.0361637	MC-HFD vs.Control	scaRNA	ENSSSCG00000023906	SCARNA1
ENSSSCT00000018522	-1.9142	3.14827	0.00288986	0.0361637	MC-HFD vs.Control	protein_coding	ENSSSCG00000017010	INSYN2B
ENSSSCT00000019097	1.01257	2.88559	0.00291906	0.0363399	MC-HFD vs.Control	protein_coding	ENSSSCG00000017543	CALCOCO2
ENSSSCT00000017252	1.39689	0.467146	0.00294117	0.036488	MC-HFD vs.Control	protein_coding	ENSSSCG00000015844	GSR
ENSSSCT00000034839	-2.04776	1.72436	0.00297211	0.0366765	MC-HFD vs.Control	protein_coding	ENSSSCG00000031027	IRS4
ENSSSCT00000047735	1.15206	1.787	0.00300396	0.0369135	MC-HFD vs.Control	snoRNA	ENSSSCG00000039963	SNORA3A
ENSSSCT00000030699	2.2001	-0.501299	0.00301198	0.036942	MC-HFD vs.Control	protein_coding	ENSSSCG00000010742	UROS
ENSSSCT00000080556	-2.36823	-1.06096	0.00304783	0.0371881	MC-HFD vs.Control	protein_coding	ENSSSCG00000017379	ETV4
ENSSSCT00000002802	-1.03021	0.477011	0.00305299	0.0372336	MC-HFD vs.Control	protein_coding	ENSSSCG00000002523	CDC42BPB
ENSSSCT00000057614	-1.2128	-0.155507	0.00307826	0.0374145	MC-HFD vs.Control	protein_coding	ENSSSCG00000025839	SUGP2
ENSSSCT00000104172	-2.355	3.73894	0.00309146	0.0375261	MC-HFD vs.Control	lncRNA	ENSSSCG00000058827	NA
ENSSSCT00000078068	-1.52696	1.21517	0.00310412	0.0375611	MC-HFD vs.Control	protein_coding	ENSSSCG00000035911	P2RY8
ENSSSCT00000001927	1.28171	0.45784	0.00310092	0.0375611	MC-HFD vs.Control	protein_coding	ENSSSCG00000001723	PLA2G7
ENSSSCT00000101278	1.25471	0.303894	0.00310943	0.0376034	MC-HFD vs.Control	lncRNA	ENSSSCG00000059000	NA
ENSSSCT00000103329	-1.14312	0.554314	0.00311545	0.0376586	MC-HFD vs.Control	lncRNA	ENSSSCG00000051900	NA
ENSSSCT00000068769	-1.44142	0.594009	0.0031328	0.0377317	MC-HFD vs.Control	protein_coding	ENSSSCG00000011453	ITIH4
ENSSSCT00000018878	-1.28938	1.51459	0.00313681	0.0377317	MC-HFD vs.Control	protein_coding	ENSSSCG00000017342	KIF18B
ENSSSCT00000032197	-1.49242	-0.384726	0.00313503	0.0377317	MC-HFD vs.Control	protein_coding	ENSSSCG00000024569	ANO9
ENSSSCT00000059712	-1.51087	1.94551	0.0031506	0.0377839	MC-HFD vs.Control	protein_coding	ENSSSCG00000039271	ST8SIA2
ENSSSCT00000095747	1.03654	4.51222	0.00315047	0.0377839	MC-HFD vs.Control	protein_coding	ENSSSCG00000059584	NA
ENSSSCT00000101418	-1.39128	1.65485	0.00317272	0.0379263	MC-HFD vs.Control	lncRNA	ENSSSCG00000054768	NA
ENSSSCT00000091777	-1.43582	-0.752966	0.00317782	0.0379488	MC-HFD vs.Control	lncRNA	ENSSSCG00000061752	NA
ENSSSCT00000072505	-1.27042	-0.943064	0.00317698	0.0379488	MC-HFD vs.Control	protein_coding	ENSSSCG00000000024	PARVB
ENSSSCT00000048014	3.72086	-1.16316	0.00317899	0.0379488	MC-HFD vs.Control	protein_coding	ENSSSCG00000000522	NAP1L1
ENSSSCT00000006520	-1.13371	3.48435	0.00326935	0.0386997	MC-HFD vs.Control	protein_coding	ENSSSCG00000005938	COL22A1
ENSSSCT00000078722	-1.04468	0.894066	0.00329438	0.0388608	MC-HFD vs.Control	protein_coding	ENSSSCG00000012857	CARS1
ENSSSCT00000051779	3.03384	3.10772	0.00330048	0.038915	MC-HFD vs.Control	protein_coding	ENSSSCG00000038162	CCL21
ENSSSCT00000094768	-2.00282	0.765653	0.00330857	0.0389396	MC-HFD vs.Control	lncRNA	ENSSSCG00000060606	NA
ENSSSCT00000087241	-1.36908	2.21297	0.00331937	0.0389782	MC-HFD vs.Control	protein_coding	ENSSSCG00000007710	MLXIPL
ENSSSCT00000011132	1.32172	0.68016	0.00333097	0.0390302	MC-HFD vs.Control	protein_coding	ENSSSCG00000010166	NTPCR
ENSSSCT00000001841	1.36064	-0.194307	0.00336588	0.0393591	MC-HFD vs.Control	protein_coding	ENSSSCG00000001655	MEA1
ENSSSCT00000059648	-1.26003	5.07491	0.00338287	0.0394556	MC-HFD vs.Control	protein_coding	ENSSSCG00000031788	PTAFR
ENSSSCT00000098649	-1.5098	4.13619	0.0034383	0.0397615	MC-HFD vs.Control	protein_coding	ENSSSCG00000059646	TNFSF15
ENSSSCT00000032142	-1.91742	4.3507	0.00344415	0.0397615	MC-HFD vs.Control	protein_coding	ENSSSCG00000021956	LY75
ENSSSCT00000000139	1.2695	3.54036	0.00352433	0.0402924	MC-HFD vs.Control	protein_coding	ENSSSCG00000000133	TST
ENSSSCT00000096159	-1.11731	-0.270486	0.0036011	0.0408608	MC-HFD vs.Control	lncRNA	ENSSSCG00000059470	NA
ENSSSCT00000068173	1.04783	1.91625	0.00362288	0.0409767	MC-HFD vs.Control	protein_coding	ENSSSCG00000012149	RBBP7
ENSSSCT00000045664	1.17779	2.31634	0.00362871	0.0409767	MC-HFD vs.Control	protein_coding	ENSSSCG00000038444	ENY2
ENSSSCT00000101947	1.69687	2.18941	0.00362764	0.0409767	MC-HFD vs.Control	lncRNA	ENSSSCG00000060726	NA
ENSSSCT00000052121	-1.79349	-1.14946	0.00365018	0.0411654	MC-HFD vs.Control	protein_coding	ENSSSCG00000011330	NBEAL2
ENSSSCT00000058810	-2.31318	-0.620954	0.00367478	0.0413528	MC-HFD vs.Control	protein_coding	ENSSSCG00000001560	BNIP5
ENSSSCT00000093114	-1.0978	0.193698	0.00370006	0.0414497	MC-HFD vs.Control	protein_coding	ENSSSCG00000008721	ABLIM2
ENSSSCT00000090477	-1.07989	-0.433082	0.00375301	0.0418335	MC-HFD vs.Control	protein_coding	ENSSSCG00000017753	KSR1
ENSSSCT00000021214	1.04412	3.46217	0.00376954	0.0418711	MC-HFD vs.Control	snoRNA	ENSSSCG00000019619	SNORD10
ENSSSCT00000095969	1.17373	4.0528	0.00376645	0.0418711	MC-HFD vs.Control	protein_coding	ENSSSCG00000056374	STMP1
ENSSSCT00000036827	-1.32947	0.376928	0.00379266	0.0420225	MC-HFD vs.Control	protein_coding	ENSSSCG00000034154	WNK2
ENSSSCT00000065403	1.10811	2.59957	0.00380628	0.0421013	MC-HFD vs.Control	protein_coding	ENSSSCG00000037735	NA
ENSSSCT00000070960	-1.17185	1.61761	0.00381059	0.0421131	MC-HFD vs.Control	protein_coding	ENSSSCG00000013775	ADGRE5
ENSSSCT00000079853	-1.28925	7.61011	0.00383912	0.0422422	MC-HFD vs.Control	protein_coding	ENSSSCG00000001427	C4A
ENSSSCT00000103571	1.28131	0.0733063	0.0038402	0.0422422	MC-HFD vs.Control	lncRNA	ENSSSCG00000055431	NA
ENSSSCT00000038586	-1.00835	2.25856	0.00386944	0.0424019	MC-HFD vs.Control	protein_coding	ENSSSCG00000009859	TESC
ENSSSCT00000023409	-1.46657	3.49817	0.00389465	0.0425701	MC-HFD vs.Control	protein_coding	ENSSSCG00000029715	OLFM1
ENSSSCT00000004646	1.00888	2.42908	0.00392467	0.0427899	MC-HFD vs.Control	protein_coding	ENSSSCG00000004205	ARHGAP18
ENSSSCT00000037547	1.44973	4.7535	0.0039521	0.043071	MC-HFD vs.Control	protein_coding	ENSSSCG00000040513	AQP3
ENSSSCT00000038574	-1.0878	4.44126	0.00400162	0.0434311	MC-HFD vs.Control	protein_coding	ENSSSCG00000003236	NA
ENSSSCT00000066013	1.22835	2.50141	0.00406467	0.0437458	MC-HFD vs.Control	protein_coding	ENSSSCG00000037251	NA
ENSSSCT00000058128	-1.17587	3.46694	0.0040536	0.0437458	MC-HFD vs.Control	protein_coding	ENSSSCG00000025133	ITGB2
ENSSSCT00000057361	1.35439	3.49534	0.00407766	0.0438668	MC-HFD vs.Control	protein_coding	ENSSSCG00000031794	TNFAIP8L3
ENSSSCT00000021185	1.61598	1.58888	0.00409524	0.0439471	MC-HFD vs.Control	snoRNA	ENSSSCG00000019590	SNORA27
ENSSSCT00000067292	-1.32817	-0.100257	0.00412423	0.0439908	MC-HFD vs.Control	protein_coding	ENSSSCG00000017562	CACNA1G
ENSSSCT00000077751	-1.18843	2.01956	0.00411959	0.0439908	MC-HFD vs.Control	protein_coding	ENSSSCG00000042191	NA
ENSSSCT00000095138	-1.02039	0.249691	0.0041323	0.0440167	MC-HFD vs.Control	lncRNA	ENSSSCG00000055754	NA
ENSSSCT00000071848	-1.26901	-0.125111	0.00414593	0.0440761	MC-HFD vs.Control	protein_coding	ENSSSCG00000008724	ACOX3
ENSSSCT00000027594	-1.0383	2.62932	0.00414401	0.0440761	MC-HFD vs.Control	protein_coding	ENSSSCG00000024678	MEGF6
ENSSSCT00000092462	-1.10854	2.50974	0.00416702	0.044223	MC-HFD vs.Control	protein_coding	ENSSSCG00000061027	C2orf66
ENSSSCT00000050197	-1.02159	-0.303134	0.00418233	0.0442947	MC-HFD vs.Control	protein_coding	ENSSSCG00000038730	ITPRID2
ENSSSCT00000000722	1.40256	3.73891	0.00417966	0.0442947	MC-HFD vs.Control	protein_coding	ENSSSCG00000031712	MFAP5
ENSSSCT00000073974	-1.26228	0.960517	0.0041995	0.0443993	MC-HFD vs.Control	protein_coding	ENSSSCG00000005689	FNBP1
ENSSSCT00000018789	1.03347	1.15856	0.00421673	0.0445011	MC-HFD vs.Control	protein_coding	ENSSSCG00000017260	WIPI1
ENSSSCT00000079379	-1.02734	-0.0718091	0.00422789	0.0445769	MC-HFD vs.Control	protein_coding	ENSSSCG00000001544	TEAD3
ENSSSCT00000064366	1.27142	10.9533	0.00423288	0.0445907	MC-HFD vs.Control	protein_coding	ENSSSCG00000040681	FABP4
ENSSSCT00000075002	-1.16672	0.346406	0.00424734	0.0446367	MC-HFD vs.Control	protein_coding	ENSSSCG00000040993	NA
ENSSSCT00000043562	1.09445	2.64237	0.00424979	0.0446443	MC-HFD vs.Control	protein_coding	ENSSSCG00000034655	COQ7
ENSSSCT00000061255	-1.28308	1.18218	0.0042798	0.0447401	MC-HFD vs.Control	protein_coding	ENSSSCG00000040820	NA
ENSSSCT00000019556	1.55175	1.45962	0.0043053	0.0448999	MC-HFD vs.Control	protein_coding	ENSSSCG00000017971	NA
ENSSSCT00000003622	1.33251	3.27402	0.00435381	0.0452057	MC-HFD vs.Control	protein_coding	ENSSSCG00000003261	NA
ENSSSCT00000073065	2.35261	-0.454862	0.00437945	0.045381	MC-HFD vs.Control	protein_coding	ENSSSCG00000038465	VAPA
ENSSSCT00000100670	1.01035	2.58466	0.00439293	0.045448	MC-HFD vs.Control	protein_coding	ENSSSCG00000053136	SMIM12
ENSSSCT00000056781	-1.30272	-0.721087	0.00444259	0.0457244	MC-HFD vs.Control	protein_coding	ENSSSCG00000021706	KIF21B
ENSSSCT00000003114	-2.1339	4.48144	0.00449143	0.0459534	MC-HFD vs.Control	protein_coding	ENSSSCG00000002814	ADGRG3
ENSSSCT00000022266	1.06854	3.20057	0.00451589	0.046149	MC-HFD vs.Control	protein_coding	ENSSSCG00000015796	PDLIM3
ENSSSCT00000069296	-2.57234	-0.988174	0.00453212	0.0462237	MC-HFD vs.Control	protein_coding	ENSSSCG00000017476	MSL1
ENSSSCT00000087045	-3.40085	-1.13299	0.0045556	0.0462918	MC-HFD vs.Control	protein_coding	ENSSSCG00000030076	SLC6A13
ENSSSCT00000020158	1.02665	7.21169	0.00456672	0.0462985	MC-HFD vs.Control	snoRNA	ENSSSCG00000018563	SNORA48
ENSSSCT00000083364	-1.27443	0.0151654	0.00457715	0.0463523	MC-HFD vs.Control	lncRNA	ENSSSCG00000037652	NA
ENSSSCT00000042671	3.40537	-0.229136	0.00460084	0.0464856	MC-HFD vs.Control	protein_coding	ENSSSCG00000032723	ACER3
ENSSSCT00000082324	1.09413	1.31575	0.00464082	0.0465738	MC-HFD vs.Control	protein_coding	ENSSSCG00000032067	NA
ENSSSCT00000045384	-1.20715	-0.529194	0.00465189	0.0466093	MC-HFD vs.Control	protein_coding	ENSSSCG00000022492	AMPD3
ENSSSCT00000038285	2.00664	0.337768	0.00466217	0.0466636	MC-HFD vs.Control	protein_coding	ENSSSCG00000013849	TPM4
ENSSSCT00000042729	2.40041	0.290625	0.00468349	0.0467555	MC-HFD vs.Control	protein_coding	ENSSSCG00000032090	PDCD6
ENSSSCT00000028783	-2.59357	0.948932	0.00471315	0.0468711	MC-HFD vs.Control	protein_coding	ENSSSCG00000020657	BCAM
ENSSSCT00000017455	-1.38112	-0.0181014	0.00473282	0.0469529	MC-HFD vs.Control	protein_coding	ENSSSCG00000016030	ZSWIM2
ENSSSCT00000103926	2.6445	-1.02475	0.00473568	0.0469529	MC-HFD vs.Control	protein_coding	ENSSSCG00000038348	NME1
ENSSSCT00000106379	-1.45663	-0.262306	0.00474387	0.0469604	MC-HFD vs.Control	lncRNA	ENSSSCG00000062295	NA
ENSSSCT00000031783	1.21399	0.909214	0.00477365	0.0471291	MC-HFD vs.Control	protein_coding	ENSSSCG00000023245	NONO
ENSSSCT00000054457	1.82176	0.279101	0.00477619	0.0471362	MC-HFD vs.Control	protein_coding	ENSSSCG00000016676	INMT
ENSSSCT00000047650	2.43774	1.02314	0.00478073	0.0471426	MC-HFD vs.Control	protein_coding	ENSSSCG00000037878	AHSP
ENSSSCT00000106007	-3.27529	-1.49142	0.00481701	0.0474187	MC-HFD vs.Control	protein_coding	ENSSSCG00000016376	PPP1R7
ENSSSCT00000048114	-1.32992	-0.683479	0.00485398	0.0476241	MC-HFD vs.Control	protein_coding	ENSSSCG00000059192	TM6SF2
ENSSSCT00000049895	-3.00232	-0.486958	0.00486684	0.0477219	MC-HFD vs.Control	protein_coding	ENSSSCG00000034858	RAP1GAP2
ENSSSCT00000045940	1.42419	-0.394933	0.00492241	0.0481575	MC-HFD vs.Control	protein_coding	ENSSSCG00000003601	HCRTR1
ENSSSCT00000002275	-1.99611	0.13059	0.00494357	0.0482552	MC-HFD vs.Control	protein_coding	ENSSSCG00000002033	CEBPE
ENSSSCT00000093415	-1.54334	-0.586504	0.00495151	0.0482702	MC-HFD vs.Control	lncRNA	ENSSSCG00000054269	NA
ENSSSCT00000091047	-1.53102	2.69043	0.00496164	0.0482877	MC-HFD vs.Control	lncRNA	ENSSSCG00000047187	NA
ENSSSCT00000072351	-1.49065	-0.00649928	0.00496926	0.0482877	MC-HFD vs.Control	protein_coding	ENSSSCG00000040968	DUS3L
ENSSSCT00000104799	-1.32774	1.80675	0.00497851	0.0483233	MC-HFD vs.Control	protein_coding	ENSSSCG00000016754	AEBP1
ENSSSCT00000042231	-2.04497	-0.957364	0.00498428	0.0483611	MC-HFD vs.Control	protein_coding	ENSSSCG00000037530	TACC2
ENSSSCT00000087191	-1.01324	0.708375	0.00499709	0.048431	MC-HFD vs.Control	protein_coding	ENSSSCG00000001858	CIB1
ENSSSCT00000081880	-1.0679	1.99601	0.00501472	0.0485837	MC-HFD vs.Control	protein_coding	ENSSSCG00000005715	PRRC2B
ENSSSCT00000004642	-1.32601	0.184339	0.00502233	0.0486211	MC-HFD vs.Control	protein_coding	ENSSSCG00000004201	TMEM200A
ENSSSCT00000064470	2.91945	-0.0560728	0.00507597	0.0489393	MC-HFD vs.Control	protein_coding	ENSSSCG00000033673	SLC25A6
ENSSSCT00000100549	1.23606	1.63038	0.00511657	0.0492026	MC-HFD vs.Control	lncRNA	ENSSSCG00000060056	NA
ENSSSCT00000023169	1.23376	0.382303	0.00512195	0.0492361	MC-HFD vs.Control	snoRNA	ENSSSCG00000021542	SNORA71
ENSSSCT00000053452	-1.14195	-0.361401	0.00513778	0.0493277	MC-HFD vs.Control	protein_coding	ENSSSCG00000024235	NPLOC4
ENSSSCT00000041266	-1.14437	0.0256371	0.00516759	0.0494453	MC-HFD vs.Control	protein_coding	ENSSSCG00000014853	GDPD5
ENSSSCT00000054100	-1.00631	3.93814	0.00516852	0.0494453	MC-HFD vs.Control	protein_coding	ENSSSCG00000033363	NA
ENSSSCT00000040712	-1.39499	-0.696616	0.00520005	0.04967	MC-HFD vs.Control	protein_coding	ENSSSCG00000036135	COL1A1
ENSSSCT00000008741	1.76129	8.93693	0.00520734	0.04967	MC-HFD vs.Control	protein_coding	ENSSSCG00000007978	NA
ENSSSCT00000095323	1.05931	0.898587	0.00522649	0.0497611	MC-HFD vs.Control	lncRNA	ENSSSCG00000058940	NA
ENSSSCT00000091407	-1.24391	3.81704	0.00523183	0.0497736	MC-HFD vs.Control	lncRNA	ENSSSCG00000044205	NA

## Sheet: DE results_liver
transcript_id	logFC	AveExpr	P.Value	adj.P.Val	coef	transcript_biotype	ensembl_gene_id	external_gene_name
ENSSSCT00000004065	3.07334	3.69839	4.47278e-07	0.00525641	liver: MC-HFD vs.ctrl	protein_coding	ENSSSCG00000003669	MFSD2A
ENSSSCT00000101726	4.18198	-2.12245	3.21547e-07	0.00525641	liver: MC-HFD vs.ctrl	protein_coding	ENSSSCG00000025020	PCSK9
ENSSSCT00000004636	-1.49486	6.46159	2.37744e-06	0.0157809	liver: MC-HFD vs.ctrl	protein_coding	ENSSSCG00000004195	ARG1
ENSSSCT00000026326	2.32568	4.71346	3.72779e-06	0.0157809	liver: MC-HFD vs.ctrl	protein_coding	ENSSSCG00000028896	DIO1
ENSSSCT00000104139	6.47832	-0.543002	3.53252e-06	0.0157809	liver: MC-HFD vs.ctrl	lncRNA	ENSSSCG00000055843	NA
ENSSSCT00000064991	1.10901	3.0109	5.52826e-06	0.0185623	liver: MC-HFD vs.ctrl	protein_coding	ENSSSCG00000006002	CCN3
ENSSSCT00000023900	1.0929	5.78988	6.59597e-06	0.019379	liver: MC-HFD vs.ctrl	protein_coding	ENSSSCG00000004509	LIPG
ENSSSCT00000002143	1.04014	1.49089	1.78634e-05	0.0279907	liver: MC-HFD vs.ctrl	protein_coding	ENSSSCG00000001914	LOXL1
ENSSSCT00000025358	1.37261	4.23168	1.48613e-05	0.0279907	liver: MC-HFD vs.ctrl	protein_coding	ENSSSCG00000022504	CDON
ENSSSCT00000100989	2.01666	3.27008	1.60255e-05	0.0279907	liver: MC-HFD vs.ctrl	lncRNA	ENSSSCG00000056025	NA
ENSSSCT00000051383	5.81641	-1.55787	1.56019e-05	0.0279907	liver: MC-HFD vs.ctrl	protein_coding	ENSSSCG00000001045	ELOVL2
ENSSSCT00000035404	-1.27146	5.2256	2.34875e-05	0.0345031	liver: MC-HFD vs.ctrl	protein_coding	ENSSSCG00000004195	ARG1
ENSSSCT00000060195	-1.57672	3.59964	4.30562e-05	0.0391537	liver: MC-HFD vs.ctrl	protein_coding	ENSSSCG00000010368	GLUD1
ENSSSCT00000074035	-1.36916	10.0071	5.57119e-05	0.0391537	liver: MC-HFD vs.ctrl	protein_coding	ENSSSCG00000010554	SCD
ENSSSCT00000009663	-1.24947	5.98171	5.94715e-05	0.0391537	liver: MC-HFD vs.ctrl	protein_coding	ENSSSCG00000008829	OCIAD2
ENSSSCT00000040600	-1.04163	5.27598	4.86361e-05	0.0391537	liver: MC-HFD vs.ctrl	protein_coding	ENSSSCG00000037808	NA
ENSSSCT00000043047	1.04217	2.24673	3.45665e-05	0.0391537	liver: MC-HFD vs.ctrl	protein_coding	ENSSSCG00000031856	DACT1
ENSSSCT00000065058	1.1154	4.0406	5.30578e-05	0.0391537	liver: MC-HFD vs.ctrl	protein_coding	ENSSSCG00000003711	CABYR
ENSSSCT00000082549	1.23439	3.28796	3.79705e-05	0.0391537	liver: MC-HFD vs.ctrl	lncRNA	ENSSSCG00000044941	NA
ENSSSCT00000096240	1.37307	1.42099	4.97349e-05	0.0391537	liver: MC-HFD vs.ctrl	lncRNA	ENSSSCG00000059563	NA
ENSSSCT00000065905	1.39428	1.80627	5.77462e-05	0.0391537	liver: MC-HFD vs.ctrl	protein_coding	ENSSSCG00000022672	TRPM4
ENSSSCT00000048331	1.55291	1.05766	5.75761e-05	0.0391537	liver: MC-HFD vs.ctrl	pseudogene	ENSSSCG00000010442	NA
ENSSSCT00000042156	2.76624	-0.309604	4.88417e-05	0.0391537	liver: MC-HFD vs.ctrl	protein_coding	ENSSSCG00000031373	LIPN
ENSSSCT00000063926	3.10731	-1.13022	4.12653e-05	0.0391537	liver: MC-HFD vs.ctrl	protein_coding	ENSSSCG00000061504	CFAP69
ENSSSCT00000027981	1.10542	4.3981	6.61843e-05	0.0409367	liver: MC-HFD vs.ctrl	protein_coding	ENSSSCG00000029886	LYVE1
ENSSSCT00000022398	1.01324	1.6406	7.59719e-05	0.0422676	liver: MC-HFD vs.ctrl	protein_coding	ENSSSCG00000011859	HEG1
ENSSSCT00000093885	1.13867	3.45438	7.73275e-05	0.0422676	liver: MC-HFD vs.ctrl	lncRNA	ENSSSCG00000055578	NA
ENSSSCT00000104519	1.2242	0.73919	7.55348e-05	0.0422676	liver: MC-HFD vs.ctrl	protein_coding	ENSSSCG00000060730	SOX17
ENSSSCT00000009543	2.01056	-0.956279	7.68745e-05	0.0422676	liver: MC-HFD vs.ctrl	protein_coding	ENSSSCG00000008723	HTRA3
ENSSSCT00000011519	1.15622	2.34872	8.03624e-05	0.0427871	liver: MC-HFD vs.ctrl	protein_coding	ENSSSCG00000010529	SFRP5
ENSSSCT00000028470	3.0334	-1.04322	8.41999e-05	0.0430225	liver: MC-HFD vs.ctrl	protein_coding	ENSSSCG00000028567	BTNL9
ENSSSCT00000058715	1.16945	2.02175	9.06249e-05	0.0439619	liver: MC-HFD vs.ctrl	protein_coding	ENSSSCG00000004336	EPHA7
ENSSSCT00000004955	1.96666	1.44121	9.16497e-05	0.0439619	liver: MC-HFD vs.ctrl	protein_coding	ENSSSCG00000004484	COL12A1
ENSSSCT00000100026	1.26133	1.55794	9.45776e-05	0.044459	liver: MC-HFD vs.ctrl	protein_coding	ENSSSCG00000004332	BACH2
ENSSSCT00000071522	1.81538	-0.973866	0.00010138	0.0467224	liver: MC-HFD vs.ctrl	lncRNA	ENSSSCG00000046363	NA
ENSSSCT00000062134	1.02291	5.41637	0.000108016	0.0479018	liver: MC-HFD vs.ctrl	protein_coding	ENSSSCG00000016866	GHR
ENSSSCT00000094484	-1.01922	3.53551	0.000119281	0.0489551	liver: MC-HFD vs.ctrl	lncRNA	ENSSSCG00000055280	NA
ENSSSCT00000065367	2.44495	5.30206	0.000120805	0.0489551	liver: MC-HFD vs.ctrl	protein_coding	ENSSSCG00000040638	DIO2
ENSSSCT00000103663	-1.36275	4.07642	0.000126891	0.0497076	liver: MC-HFD vs.ctrl	protein_coding	ENSSSCG00000057637	C4orf54
ENSSSCT00000029960	-1.29145	5.02322	0.000126664	0.0497076	liver: MC-HFD vs.ctrl	protein_coding	ENSSSCG00000029944	FASN
