# Supplementary material for: Pre-metabolic syndrome transcriptional response of adipose tissue and liver to obesity in the Ossabaw pig model
Source: Research Square preprint supplement (doi:10.21203/rs.3.rs-8039124/v1), 2025-12-06
Supplement: Supplementary file 7 [file cc9c7e0a6d053b4fefc32c40.xlsx]

## Sheet: vat_corr_coef
	BW	ABC	BMI	BSA	HDL	CHOL	SAT_area	VAT_area	RPS29	RPL34	EEFSEC	COX7C	ATP5MF	CPE	NDUFC2	GRK2	GNAI2	GABBR1	MGP	COL1A1	COL6A1	SNRPD2	LSM8	RNF113A	LOX	MFAP4	FBLN5	FASN	FABP4	SLC27A1
BW	1	0.77069	0.688708	0.997249	0.584828	0.498624	0.810844	0.706152	0.64438	0.729487	-0.583589	0.51672	0.462008	0.729487	0.498483	-0.717329	-0.668696	-0.668696	0.57751	-0.632222	-0.547115	0.735566	0.808514	0.808514	0.729487	0.528878	0.455929	-0.875384	0.0972649	-0.613985
ABC	0.77069	1	0.736488	0.758806	0.521001	0.471464	0.828862	0.504608	0.619679	0.631949	-0.705575	0.49697	0.509241	0.582866	0.546053	-0.681033	-0.619679	-0.766929	0.484699	-0.582866	-0.521512	0.607408	0.840554	0.791471	0.656491	0.472428	0.374261	-0.877367	0.0552189	-0.533783
BMI	0.688708	0.736488	1	0.675824	0.7978	0.714286	0.678571	0.809091	0.709091	0.539394	-0.648485	0.769697	0.830303	0.672727	0.721212	-0.757576	-0.6	-0.733333	0.648485	-0.684848	-0.733333	0.769697	0.648485	0.890909	0.721212	0.709091	0.69697	-0.612121	0.454545	-0.648485
BSA	0.997249	0.758806	0.675824	1	0.583219	0.489011	0.785714	0.709091	0.636364	0.733333	-0.575758	0.478788	0.430303	0.709091	0.466667	-0.69697	-0.648485	-0.660606	0.563636	-0.612121	-0.527273	0.721212	0.818182	0.793939	0.721212	0.50303	0.418182	-0.90303	0.0545455	-0.575758
HDL	0.584828	0.521001	0.7978	0.583219	1	0.927099	0.714286	0.728931	0.765961	0.571431	-0.583589	0.741645	0.832831	0.620064	0.680854	-0.784198	-0.650459	-0.64438	0.747724	-0.559273	-0.820672	0.790277	0.626143	0.735566	0.656538	0.565352	0.70517	-0.486324	0.553194	-0.711249
CHOL	0.498624	0.471464	0.714286	0.489011	0.927099	1	0.75	0.454545	0.709091	0.430303	-0.284848	0.69697	0.769697	0.406061	0.527273	-0.733333	-0.515152	-0.563636	0.551515	-0.515152	-0.612121	0.818182	0.527273	0.721212	0.406061	0.442424	0.515152	-0.345455	0.466667	-0.612121
SAT_area	0.810844	0.828862	0.678571	0.785714	0.714286	0.75	1	0.771429	0.9	0.8	-1	0.7	0.7	0.6	0.6	-0.8	-0.8	-0.9	0.8	-0.6	-0.8	0.8	0.7	0.6	0.6	0.6	0.4	-0.6	0	-0.3
VAT_area	0.706152	0.504608	0.809091	0.709091	0.728931	0.454545	0.771429	1	0.733333	0.8	-0.633333	0.633333	0.633333	0.866667	0.616667	-0.733333	-0.7	-0.583333	0.833333	-0.616667	-0.85	0.75	0.7	0.766667	0.9	0.65	0.766667	-0.766667	0.45	-0.683333
RPS29	0.64438	0.619679	0.709091	0.636364	0.765961	0.709091	0.9	0.733333	1	0.90303	-0.69697	0.866667	0.842424	0.636364	0.842424	-0.939394	-0.915152	-0.90303	0.781818	-0.915152	-0.818182	0.915152	0.818182	0.842424	0.551515	0.478788	0.709091	-0.660606	0.636364	-0.806061
RPL34	0.729487	0.631949	0.539394	0.733333	0.571431	0.430303	0.8	0.8	0.90303	1	-0.733333	0.672727	0.6	0.733333	0.709091	-0.830303	-0.915152	-0.781818	0.806061	-0.818182	-0.769697	0.806061	0.830303	0.69697	0.648485	0.418182	0.648485	-0.781818	0.466667	-0.733333
EEFSEC	-0.583589	-0.705575	-0.648485	-0.575758	-0.583589	-0.284848	-1	-0.633333	-0.69697	-0.733333	1	-0.612121	-0.575758	-0.769697	-0.781818	0.648485	0.818182	0.769697	-0.806061	0.660606	0.781818	-0.6	-0.636364	-0.539394	-0.757576	-0.69697	-0.69697	0.612121	-0.466667	0.672727
COX7C	0.51672	0.49697	0.769697	0.478788	0.741645	0.69697	0.7	0.633333	0.866667	0.672727	-0.612121	1	0.963636	0.587879	0.866667	-0.878788	-0.806061	-0.769697	0.672727	-0.854545	-0.769697	0.818182	0.587879	0.806061	0.490909	0.515152	0.842424	-0.345455	0.781818	-0.806061
ATP5MF	0.462008	0.509241	0.830303	0.430303	0.832831	0.769697	0.7	0.633333	0.842424	0.6	-0.575758	0.963636	1	0.551515	0.878788	-0.866667	-0.733333	-0.769697	0.660606	-0.818182	-0.806061	0.781818	0.587879	0.842424	0.490909	0.515152	0.818182	-0.357576	0.793939	-0.793939
CPE	0.729487	0.582866	0.672727	0.709091	0.620064	0.406061	0.6	0.866667	0.636364	0.733333	-0.769697	0.587879	0.551515	1	0.672727	-0.660606	-0.745455	-0.539394	0.927273	-0.6	-0.866667	0.721212	0.563636	0.612121	0.963636	0.818182	0.830303	-0.624242	0.490909	-0.757576
NDUFC2	0.498483	0.546053	0.721212	0.466667	0.680854	0.527273	0.6	0.616667	0.842424	0.709091	-0.781818	0.866667	0.878788	0.672727	1	-0.830303	-0.854545	-0.866667	0.781818	-0.90303	-0.890909	0.709091	0.612121	0.757576	0.563636	0.624242	0.830303	-0.442424	0.842424	-0.866667
GRK2	-0.717329	-0.681033	-0.757576	-0.69697	-0.784198	-0.733333	-0.8	-0.733333	-0.939394	-0.830303	0.648485	-0.878788	-0.866667	-0.660606	-0.830303	1	0.915152	0.878788	-0.721212	0.842424	0.806061	-0.890909	-0.878788	-0.915152	-0.587879	-0.442424	-0.69697	0.672727	-0.575758	0.915152
GNAI2	-0.668696	-0.619679	-0.6	-0.648485	-0.650459	-0.515152	-0.8	-0.7	-0.915152	-0.915152	0.818182	-0.806061	-0.733333	-0.745455	-0.854545	0.915152	1	0.866667	-0.818182	0.842424	0.830303	-0.818182	-0.818182	-0.733333	-0.636364	-0.50303	-0.733333	0.648485	-0.6	0.90303
GABBR1	-0.668696	-0.766929	-0.733333	-0.660606	-0.64438	-0.563636	-0.9	-0.583333	-0.90303	-0.781818	0.769697	-0.769697	-0.769697	-0.539394	-0.866667	0.878788	0.866667	1	-0.648485	0.890909	0.721212	-0.781818	-0.842424	-0.842424	-0.478788	-0.490909	-0.551515	0.69697	-0.515152	0.769697
MGP	0.57751	0.484699	0.648485	0.563636	0.747724	0.551515	0.8	0.833333	0.781818	0.806061	-0.806061	0.672727	0.660606	0.927273	0.781818	-0.721212	-0.818182	-0.648485	1	-0.709091	-0.951515	0.793939	0.575758	0.612121	0.866667	0.793939	0.866667	-0.575758	0.660606	-0.781818
COL1A1	-0.632222	-0.582866	-0.684848	-0.612121	-0.559273	-0.515152	-0.6	-0.616667	-0.915152	-0.818182	0.660606	-0.854545	-0.818182	-0.6	-0.90303	0.842424	0.842424	0.890909	-0.709091	1	0.769697	-0.806061	-0.672727	-0.818182	-0.466667	-0.527273	-0.721212	0.551515	-0.733333	0.757576
COL6A1	-0.547115	-0.521512	-0.733333	-0.527273	-0.820672	-0.612121	-0.8	-0.85	-0.818182	-0.769697	0.781818	-0.769697	-0.806061	-0.866667	-0.890909	0.806061	0.830303	0.721212	-0.951515	0.769697	1	-0.769697	-0.624242	-0.721212	-0.806061	-0.721212	-0.90303	0.551515	-0.769697	0.866667
SNRPD2	0.735566	0.607408	0.769697	0.721212	0.790277	0.818182	0.8	0.75	0.915152	0.806061	-0.6	0.818182	0.781818	0.721212	0.709091	-0.890909	-0.818182	-0.781818	0.793939	-0.806061	-0.769697	1	0.745455	0.854545	0.660606	0.636364	0.69697	-0.648485	0.515152	-0.769697
LSM8	0.808514	0.840554	0.648485	0.818182	0.626143	0.527273	0.7	0.7	0.818182	0.830303	-0.636364	0.587879	0.587879	0.563636	0.612121	-0.878788	-0.818182	-0.842424	0.575758	-0.672727	-0.624242	0.745455	1	0.830303	0.563636	0.272727	0.393939	-0.90303	0.187879	-0.733333
RNF113A	0.808514	0.791471	0.890909	0.793939	0.735566	0.721212	0.6	0.766667	0.842424	0.69697	-0.539394	0.806061	0.842424	0.612121	0.757576	-0.915152	-0.733333	-0.842424	0.612121	-0.818182	-0.721212	0.854545	0.830303	1	0.587879	0.50303	0.612121	-0.721212	0.466667	-0.781818
LOX	0.729487	0.656491	0.721212	0.721212	0.656538	0.406061	0.6	0.9	0.551515	0.648485	-0.757576	0.490909	0.490909	0.963636	0.563636	-0.587879	-0.636364	-0.478788	0.866667	-0.466667	-0.806061	0.660606	0.563636	0.587879	1	0.806061	0.745455	-0.672727	0.333333	-0.648485
MFAP4	0.528878	0.472428	0.709091	0.50303	0.565352	0.442424	0.6	0.65	0.478788	0.418182	-0.69697	0.515152	0.515152	0.818182	0.624242	-0.442424	-0.50303	-0.490909	0.793939	-0.527273	-0.721212	0.636364	0.272727	0.50303	0.806061	1	0.721212	-0.369697	0.490909	-0.539394
FBLN5	0.455929	0.374261	0.69697	0.418182	0.70517	0.515152	0.4	0.766667	0.709091	0.648485	-0.69697	0.842424	0.818182	0.830303	0.830303	-0.69697	-0.733333	-0.551515	0.866667	-0.721212	-0.90303	0.69697	0.393939	0.612121	0.745455	0.721212	1	-0.29697	0.842424	-0.769697
FASN	-0.875384	-0.877367	-0.612121	-0.90303	-0.486324	-0.345455	-0.6	-0.766667	-0.660606	-0.781818	0.612121	-0.345455	-0.357576	-0.624242	-0.442424	0.672727	0.648485	0.69697	-0.575758	0.551515	0.551515	-0.648485	-0.90303	-0.721212	-0.672727	-0.369697	-0.29697	1	0.00606061	0.527273
FABP4	0.0972649	0.0552189	0.454545	0.0545455	0.553194	0.466667	0	0.45	0.636364	0.466667	-0.466667	0.781818	0.793939	0.490909	0.842424	-0.575758	-0.6	-0.515152	0.660606	-0.733333	-0.769697	0.515152	0.187879	0.466667	0.333333	0.490909	0.842424	0.00606061	1	-0.672727
SLC27A1	-0.613985	-0.533783	-0.648485	-0.575758	-0.711249	-0.612121	-0.3	-0.683333	-0.806061	-0.733333	0.672727	-0.806061	-0.793939	-0.757576	-0.866667	0.915152	0.90303	0.769697	-0.781818	0.757576	0.866667	-0.769697	-0.733333	-0.781818	-0.648485	-0.539394	-0.769697	0.527273	-0.672727	1

## Sheet: vat_p.adjust
	BW	ABC	BMI	BSA	HDL	CHOL	SAT_area	VAT_area	RPS29	RPL34	EEFSEC	COX7C	ATP5MF	CPE	NDUFC2	GRK2	GNAI2	GABBR1	MGP	COL1A1	COL6A1	SNRPD2	LSM8	RNF113A	LOX	MFAP4	FBLN5	FASN	FABP4	SLC27A1
BW	0	0.00164974	0.00247376	3.10447e-15	0.0210765	0.0479372	0.0957987	0.104703	0.00707848	0.00608017	0.0200348	0.0494792	0.045273	0.0201874	0.0343248	0.00247376	0.00477992	0.0200348	0.00359767	0.0393413	0.0278265	0.0183018	0.0096744	0.00745158	0.014663	0.0938594	0.0915542	0.0114431	0.236759	0.0200348
ABC	0.00164974	0	0.00477992	0.00142897	0.0938594	0.131824	0.0569105	0.252237	0.0194549	0.0200348	0.0108508	0.0696998	0.0652239	0.0612889	0.0421851	0.0096744	0.0140046	0.018501	0.0104111	0.054196	0.0565638	0.0565547	0.0248783	0.0104111	0.0478589	0.0982916	0.153926	0.0232422	0.266128	0.054196
BMI	0.00247376	0.00477992	0	0.00247376	0.00995624	0.0227034	0.054196	0.0474106	0.0140046	0.0259066	0.0108508	0.017589	0.0182506	0.0248783	0.0209235	0.00608017	0.0100312	0.022788	0.00477992	0.0662149	0.0232422	0.0200348	0.0288163	0.0102315	0.0188268	0.0350019	0.0339453	0.0928622	0.0982916	0.0284114
BSA	3.10447e-15	0.00142897	0.00247376	0	0.0220821	0.0515564	0.0973646	0.102852	0.00742187	0.00654685	0.0200348	0.0526101	0.0465835	0.0200348	0.0339453	0.00251832	0.00477992	0.0200348	0.00354652	0.0407573	0.0267144	0.0187466	0.00995624	0.00757332	0.0143548	0.0894348	0.0899391	0.011548	0.236759	0.0200348
HDL	0.0210765	0.0938594	0.00995624	0.0220821	0	0.000333876	0.196556	0.243785	0.0339071	0.101284	0.177318	0.0304652	0.0120868	0.0740619	0.0244318	0.02501	0.0612514	0.102852	0.0382041	0.166984	0.017589	0.020148	0.0847481	0.056469	0.0633869	0.0699875	0.0324761	0.432009	0.0820167	0.0471157
CHOL	0.0479372	0.131824	0.0227034	0.0515564	0.000333876	0	0.323728	0.425093	0.0813709	0.232168	0.43912	0.0443671	0.0248783	0.166984	0.0500936	0.0769751	0.174886	0.250015	0.113722	0.203784	0.0766776	0.0303109	0.242514	0.15209	0.172063	0.102852	0.0537994	0.770166	0.0982916	0.139682
SAT_area	0.0957987	0.0569105	0.054196	0.0973646	0.196556	0.323728	0	0.5198	0.203784	0.134743	0.035413	0.455696	0.487391	0.607788	0.601249	0.162183	0.189545	0.107088	0.282026	0.550643	0.447252	0.3396	0.132936	0.158653	0.392317	0.605775	0.861112	0.162763	0.953737	0.794621
VAT_area	0.104703	0.252237	0.0474106	0.102852	0.243785	0.425093	0.5198	0	0.135602	0.121215	0.181115	0.231814	0.26668	0.0235956	0.257093	0.114448	0.0938594	0.353404	0.0372461	0.277715	0.0582565	0.170945	0.0938594	0.0821334	0.0123341	0.0617609	0.058061	0.191709	0.298838	0.148635
RPS29	0.00707848	0.0194549	0.0140046	0.00742187	0.0339071	0.0813709	0.203784	0.135602	0	0.000404569	0.0221898	0.00761945	0.00992366	0.035413	0.0057677	0.000257163	0.000951591	0.00247376	0.00477992	0.00477992	0.00762306	0.00293986	0.00958987	0.0103939	0.0474106	0.122672	0.0617609	0.0497724	0.0533072	0.0104111
RPL34	0.00608017	0.0200348	0.0259066	0.00654685	0.101284	0.232168	0.134743	0.121215	0.000404569	0	0.0200348	0.0248783	0.0365276	0.0361839	0.0210765	0.0016164	0.000920263	0.00464762	0.0057677	0.00761945	0.015793	0.0076091	0.00761945	0.017589	0.0415788	0.199945	0.122005	0.017589	0.122005	0.0180524
EEFSEC	0.0200348	0.0108508	0.0108508	0.0200348	0.177318	0.43912	0.035413	0.181115	0.0221898	0.0200348	0	0.0451647	0.0633869	0.0218752	0.0339071	0.0196387	0.0057677	0.00745158	0.00608017	0.0817541	0.0333596	0.0377281	0.0814791	0.0617609	0.0339453	0.0393413	0.0567854	0.0916754	0.0807926	0.0304652
COX7C	0.0494792	0.0696998	0.017589	0.0526101	0.0304652	0.0443671	0.455696	0.231814	0.00761945	0.0248783	0.0451647	0	0.000449676	0.0703008	0.00574868	0.00761945	0.0106994	0.0129221	0.0200348	0.0183018	0.0210756	0.0104111	0.0373424	0.020148	0.107088	0.118015	0.0222032	0.417661	0.00995624	0.0104111
ATP5MF	0.045273	0.0652239	0.0182506	0.0465835	0.0120868	0.0248783	0.487391	0.26668	0.00992366	0.0365276	0.0633869	0.000449676	0	0.0679866	0.00252179	0.00720386	0.0150516	0.0167778	0.0200348	0.0248277	0.0129274	0.0157933	0.032277	0.0129226	0.101787	0.0954345	0.0183018	0.446825	0.0104111	0.00608017
CPE	0.0201874	0.0612889	0.0248783	0.0200348	0.0740619	0.166984	0.607788	0.0235956	0.035413	0.0361839	0.0218752	0.0703008	0.0679866	0	0.0415788	0.0267144	0.00995624	0.0664225	0.00246323	0.158653	0.0139061	0.0214085	0.0954345	0.0828323	0.00142079	0.00761945	0.00574868	0.153663	0.0637963	0.0104111
NDUFC2	0.0343248	0.0421851	0.0209235	0.0339453	0.0244318	0.0500936	0.601249	0.257093	0.0057677	0.0210765	0.0339071	0.00574868	0.00252179	0.0415788	0	0.00761945	0.00995624	0.00477992	0.0104712	0.00761945	0.00761945	0.0139061	0.0617609	0.0218752	0.107738	0.0361183	0.0164711	0.353404	0.00574868	0.00761945
GRK2	0.00247376	0.0096744	0.00608017	0.00251832	0.02501	0.0769751	0.162183	0.114448	0.000257163	0.0016164	0.0196387	0.00761945	0.00720386	0.0267144	0.00761945	0	0.000773518	0.00477992	0.00293986	0.0129226	0.00958987	0.00477992	0.00477992	0.00477992	0.0266611	0.112103	0.0529137	0.0391512	0.0756077	0.00608017
GNAI2	0.00477992	0.0140046	0.0100312	0.00477992	0.0612514	0.174886	0.189545	0.0938594	0.000951591	0.000920263	0.0057677	0.0106994	0.0150516	0.00995624	0.00995624	0.000773518	0	0.00293986	0.0005058	0.0170388	0.00654685	0.0057677	0.0104111	0.0129226	0.0152776	0.0662494	0.0306216	0.0438227	0.0478517	0.00418454
GABBR1	0.0200348	0.018501	0.022788	0.0200348	0.102852	0.250015	0.107088	0.353404	0.00247376	0.00464762	0.00745158	0.0129221	0.0167778	0.0664225	0.00477992	0.00477992	0.00293986	0	0.0102618	0.00535809	0.0164711	0.017589	0.0298619	0.021928	0.121272	0.122005	0.0892911	0.0970176	0.0339453	0.0169912
MGP	0.00359767	0.0104111	0.00477992	0.00354652	0.0382041	0.113722	0.282026	0.0372461	0.00477992	0.0057677	0.00608017	0.0200348	0.0200348	0.00246323	0.0104712	0.00293986	0.0005058	0.0102618	0	0.035413	0.00477992	0.00755817	0.0210765	0.0164711	0.00477992	0.0185806	0.0126936	0.0565638	0.04869	0.0057677
COL1A1	0.0393413	0.054196	0.0662149	0.0407573	0.166984	0.203784	0.550643	0.277715	0.00477992	0.00761945	0.0817541	0.0183018	0.0248277	0.158653	0.00761945	0.0129226	0.0170388	0.00535809	0.035413	0	0.035413	0.0283104	0.0403951	0.0255623	0.275414	0.266128	0.155432	0.158822	0.0415788	0.0435147
COL6A1	0.0278265	0.0565638	0.0232422	0.0267144	0.017589	0.0766776	0.447252	0.0582565	0.00762306	0.015793	0.0333596	0.0210756	0.0129274	0.0139061	0.00761945	0.00958987	0.00654685	0.0164711	0.00477992	0.035413	0	0.0248277	0.0200348	0.0139061	0.0187095	0.0438227	0.0140046	0.171638	0.0248783	0.0076091
SNRPD2	0.0183018	0.0565547	0.0200348	0.0187466	0.020148	0.0303109	0.3396	0.170945	0.00293986	0.0076091	0.0377281	0.0104111	0.0157933	0.0214085	0.0139061	0.00477992	0.0057677	0.017589	0.00755817	0.0283104	0.0248277	0	0.0533072	0.0617609	0.035413	0.0644347	0.0349644	0.118941	0.0556475	0.0185795
LSM8	0.0096744	0.0248783	0.0288163	0.00995624	0.0847481	0.242514	0.132936	0.0938594	0.00958987	0.00761945	0.0814791	0.0373424	0.032277	0.0954345	0.0617609	0.00477992	0.0104111	0.0298619	0.0210765	0.0403951	0.0200348	0.0533072	0	0.00155998	0.0473258	0.457966	0.194654	0.0240284	0.273379	0.0200348
RNF113A	0.00745158	0.0104111	0.0102315	0.00757332	0.056469	0.15209	0.158653	0.0821334	0.0103939	0.017589	0.0617609	0.020148	0.0129226	0.0828323	0.0218752	0.00477992	0.0129226	0.021928	0.0164711	0.0255623	0.0139061	0.0617609	0.00155998	0	0.0555022	0.233875	0.0976466	0.0684965	0.134214	0.0164711
LOX	0.014663	0.0478589	0.0188268	0.0143548	0.0633869	0.172063	0.392317	0.0123341	0.0474106	0.0415788	0.0339453	0.107088	0.101787	0.00142079	0.107738	0.0266611	0.0152776	0.121272	0.00477992	0.275414	0.0187095	0.035413	0.0473258	0.0555022	0	0.0288748	0.0200348	0.0719421	0.205319	0.022587
MFAP4	0.0938594	0.0982916	0.0350019	0.0894348	0.0699875	0.102852	0.605775	0.0617609	0.122672	0.199945	0.0393413	0.118015	0.0954345	0.00761945	0.0361183	0.112103	0.0662494	0.122005	0.0185806	0.266128	0.0438227	0.0644347	0.457966	0.233875	0.0288748	0	0.00477992	0.586014	0.0373424	0.0617609
FBLN5	0.0915542	0.153926	0.0339453	0.0899391	0.0324761	0.0537994	0.861112	0.058061	0.0617609	0.122005	0.0567854	0.0222032	0.0183018	0.00574868	0.0164711	0.0529137	0.0306216	0.0892911	0.0126936	0.155432	0.0140046	0.0349644	0.194654	0.0976466	0.0200348	0.00477992	0	0.697393	0.0076091	0.0104111
FASN	0.0114431	0.0232422	0.0928622	0.011548	0.432009	0.770166	0.162763	0.191709	0.0497724	0.017589	0.0916754	0.417661	0.446825	0.153663	0.353404	0.0391512	0.0438227	0.0970176	0.0565638	0.158822	0.171638	0.118941	0.0240284	0.0684965	0.0719421	0.586014	0.697393	0	0.955642	0.202856
FABP4	0.236759	0.266128	0.0982916	0.236759	0.0820167	0.0982916	0.953737	0.298838	0.0533072	0.122005	0.0807926	0.00995624	0.0104111	0.0637963	0.00574868	0.0756077	0.0478517	0.0339453	0.04869	0.0415788	0.0248783	0.0556475	0.273379	0.134214	0.205319	0.0373424	0.0076091	0.955642	0	0.021928
SLC27A1	0.0200348	0.054196	0.0284114	0.0200348	0.0471157	0.139682	0.794621	0.148635	0.0104111	0.0180524	0.0304652	0.0104111	0.00608017	0.0104111	0.00761945	0.00608017	0.00418454	0.0169912	0.0057677	0.0435147	0.0076091	0.0185795	0.0200348	0.0164711	0.022587	0.0617609	0.0104111	0.202856	0.021928	0

## Sheet: liver_corr_coef
	BW	ABC	BMI	BSA	HDL	CHOL	SAT_area	VAT_area	FASN	SCD	ELOVL2	LIPG	LIPN	GLUD1	ARG1	DIO2	DIO1
BW	1	0.77069	0.688708	0.997249	0.584828	0.498624	0.810844	0.706152	-0.741645	-0.759882	0.589668	0.893621	0.790277	-0.626143	-0.735566	0.510641	0.668696
ABC	0.77069	1	0.736488	0.758806	0.521001	0.471464	0.828862	0.504608	-0.472428	-0.631949	0.546053	0.852825	0.570595	-0.374261	-0.521512	0.374261	0.484699
BMI	0.688708	0.736488	1	0.675824	0.7978	0.714286	0.678571	0.809091	-0.575758	-0.781818	0.757576	0.830303	0.672727	-0.624242	-0.6	0.563636	0.648485
BSA	0.997249	0.758806	0.675824	1	0.583219	0.489011	0.785714	0.709091	-0.745455	-0.745455	0.6	0.90303	0.781818	-0.612121	-0.745455	0.50303	0.660606
HDL	0.584828	0.521001	0.7978	0.583219	1	0.927099	0.714286	0.728931	-0.626143	-0.607906	0.729487	0.522799	0.559273	-0.662617	-0.571431	0.77204	0.674775
CHOL	0.498624	0.471464	0.714286	0.489011	0.927099	1	0.75	0.454545	-0.454545	-0.430303	0.563636	0.260606	0.29697	-0.442424	-0.29697	0.709091	0.551515
SAT_area	0.810844	0.828862	0.678571	0.785714	0.714286	0.75	1	0.771429	-0.5	-0.6	1	0.9	0.9	-0.7	-0.7	0.5	0.7
VAT_area	0.706152	0.504608	0.809091	0.709091	0.728931	0.454545	0.771429	1	-0.648485	-0.636364	0.733333	0.769697	0.672727	-0.781818	-0.854545	0.660606	0.660606
FASN	-0.741645	-0.472428	-0.575758	-0.745455	-0.626143	-0.454545	-0.5	-0.648485	1	0.830303	-0.769697	-0.684848	-0.830303	0.842424	0.818182	-0.624242	-0.818182
SCD	-0.759882	-0.631949	-0.781818	-0.745455	-0.607906	-0.430303	-0.6	-0.636364	0.830303	1	-0.660606	-0.672727	-0.757576	0.769697	0.6	-0.490909	-0.69697
ELOVL2	0.589668	0.546053	0.757576	0.6	0.729487	0.563636	1	0.733333	-0.769697	-0.660606	1	0.757576	0.781818	-0.793939	-0.818182	0.757576	0.890909
LIPG	0.893621	0.852825	0.830303	0.90303	0.522799	0.260606	0.9	0.769697	-0.684848	-0.672727	0.757576	1	0.866667	-0.575758	-0.769697	0.442424	0.684848
LIPN	0.790277	0.570595	0.672727	0.781818	0.559273	0.29697	0.9	0.672727	-0.830303	-0.757576	0.781818	0.866667	1	-0.721212	-0.781818	0.478788	0.806061
GLUD1	-0.626143	-0.374261	-0.624242	-0.612121	-0.662617	-0.442424	-0.7	-0.781818	0.842424	0.769697	-0.793939	-0.575758	-0.721212	1	0.878788	-0.842424	-0.90303
ARG1	-0.735566	-0.521512	-0.6	-0.745455	-0.571431	-0.29697	-0.7	-0.854545	0.818182	0.6	-0.818182	-0.769697	-0.781818	0.878788	1	-0.769697	-0.866667
DIO2	0.510641	0.374261	0.563636	0.50303	0.77204	0.709091	0.5	0.660606	-0.624242	-0.490909	0.757576	0.442424	0.478788	-0.842424	-0.769697	1	0.866667
DIO1	0.668696	0.484699	0.648485	0.660606	0.674775	0.551515	0.7	0.660606	-0.818182	-0.69697	0.890909	0.684848	0.806061	-0.90303	-0.866667	0.866667	1

## Sheet: liver_p.adjust
	BW	ABC	BMI	BSA	HDL	CHOL	SAT_area	VAT_area	FASN	SCD	ELOVL2	LIPG	LIPN	GLUD1	ARG1	DIO2	DIO1
BW	0	0.00180523	0.00244911	9.70594e-16	0.0280723	0.0584728	0.105784	0.114905	0.0333198	0.0167975	0.0548556	0.00804414	0.030702	0.0691519	0.0297983	0.0998447	0.0220659
ABC	0.00180523	0	0.00536022	0.00163812	0.103991	0.143649	0.0671378	0.256457	0.151349	0.030702	0.0998447	0.0110985	0.0584728	0.248445	0.134603	0.333975	0.0691519
BMI	0.00244911	0.00536022	0	0.00244911	0.0112652	0.0297983	0.0647168	0.0581676	0.0788529	0.0084698	0.0271174	0.00547604	0.027363	0.0691519	0.0328226	0.121972	0.0306351
BSA	9.70594e-16	0.00163812	0.00244911	0	0.0297523	0.0614817	0.107022	0.113185	0.0333198	0.0167975	0.0543101	0.00801331	0.030702	0.0691519	0.0297983	0.099704	0.0216889
HDL	0.0280723	0.103991	0.0112652	0.0297523	0	0.000156576	0.209916	0.248645	0.103991	0.0670546	0.110704	0.212761	0.188044	0.0918346	0.117444	0.0797799	0.0691519
CHOL	0.0584728	0.143649	0.0297983	0.0614817	0.000156576	0	0.32168	0.409537	0.245276	0.168765	0.283778	0.358946	0.291899	0.368634	0.378084	0.28776	0.248445
SAT_area	0.105784	0.0671378	0.0647168	0.107022	0.209916	0.32168	0	0.506656	0.280024	0.248445	0.0297983	0.0691519	0.0483037	0.263478	0.188044	0.369412	0.156387
VAT_area	0.114905	0.256457	0.0581676	0.113185	0.248645	0.409537	0.506656	0	0.211802	0.212761	0.209035	0.0542531	0.137556	0.0960816	0.030702	0.188044	0.170902
FASN	0.0333198	0.151349	0.0788529	0.0333198	0.103991	0.245276	0.280024	0.211802	0	0.0220659	0.0280723	0.0364411	0.030702	0.0110985	0.0121904	0.0649332	0.00921688
SCD	0.0167975	0.030702	0.0084698	0.0167975	0.0670546	0.168765	0.248445	0.212761	0.0220659	0	0.0588018	0.0217104	0.0647168	0.0413216	0.0548582	0.243444	0.0341362
ELOVL2	0.0548556	0.0998447	0.0271174	0.0543101	0.110704	0.283778	0.0297983	0.209035	0.0280723	0.0588018	0	0.0167975	0.00711991	0.0312643	0.0116078	0.0280723	0.00569595
LIPG	0.00804414	0.0110985	0.00547604	0.00801331	0.212761	0.358946	0.0691519	0.0542531	0.0364411	0.0217104	0.0167975	0	0.00455248	0.0873657	0.0279521	0.164506	0.027363
LIPN	0.030702	0.0584728	0.027363	0.030702	0.188044	0.291899	0.0483037	0.137556	0.030702	0.0647168	0.00711991	0.00455248	0	0.0747281	0.0333198	0.100284	0.0116078
GLUD1	0.0691519	0.248445	0.0691519	0.0691519	0.0918346	0.368634	0.263478	0.0960816	0.0110985	0.0413216	0.0312643	0.0873657	0.0747281	0	0.0029988	0.0111493	0.00553403
ARG1	0.0297983	0.134603	0.0328226	0.0297983	0.117444	0.378084	0.188044	0.030702	0.0121904	0.0548582	0.0116078	0.0279521	0.0333198	0.0029988	0	0.00711991	0.00547604
DIO2	0.0998447	0.333975	0.121972	0.099704	0.0797799	0.28776	0.369412	0.188044	0.0649332	0.243444	0.0280723	0.164506	0.100284	0.0111493	0.00711991	0	0.0084698
DIO1	0.0220659	0.0691519	0.0306351	0.0216889	0.0691519	0.248445	0.156387	0.170902	0.00921688	0.0341362	0.00569595	0.027363	0.0116078	0.00553403	0.00547604	0.0084698	0
