# Supplementary material for: Pre-metabolic syndrome transcriptional response of adipose tissue and liver to obesity in the Ossabaw pig model
Source: Research Square preprint supplement (doi:10.21203/rs.3.rs-8039124/v1), 2025-12-06
Supplement: Supplementary file 8 [file f35ef51178872fafeed27bf0.xlsx]

## Sheet: vat_cluster1
# background genes	# genes	category	description	FDR value	genes	p-value	term name
21	18	GO Biological Process	Translation	1.07e-11	RPL36AL|EIF3H|RPL34|RPS17|RPL23A|RPL10|RPS19|RPL23|RPS24|RPS15A|EEFSEC|EIF3L|RPS29|RPS27A|RPL17-C18orf32|RPL37|RPL36A-HNRNPH2|EIF4H	6.89e-15	GO:0006412
8	8	GO Cellular Component	Cytosolic large ribosomal subunit	4.63e-05	RPL36AL|RPL34|RPL23A|RPL10|RPL23|RPL17-C18orf32|RPL37|RPL36A-HNRNPH2	5.76e-07	GO:0022625
106	18	GO Cellular Component	Cytosol	0.0011	PDCD5|RPL36AL|RPL34|RPS17|RPL23A|RNF34|RPL10|RPS19|RPL23|COPS5|RPS24|RPS15A|RPS29|RPS27A|RPL17-C18orf32|RPL37|HGS|RPL36A-HNRNPH2	2.27e-05	GO:0005829
6	6	GO Cellular Component	Cytosolic small ribosomal subunit	0.0011	RPS17|RPS19|RPS24|RPS15A|RPS29|RPS27A	1.97e-05	GO:0022627
13	7	GO Biological Process	Ribonucleoprotein complex biogenesis	0.0039	EIF3H|RPL23A|RPL10|RPS19|RPS24|EIF3L|EIF4H	6e-05	GO:0022613
5	5	GO Cellular Component	Cytoplasmic side of rough endoplasmic reticulum membrane	0.0041	RPL36AL|RPS17|RPL10|RPL23|RPS29	0.00011	GO:0098556
5	5	GO Biological Process	Cytoplasmic translation	0.0069	EIF3H|EIF3L|RPS29|RPL17-C18orf32|EIF4H	0.00011	GO:0002181
5	5	GO Molecular Function	Translation regulator activity	0.0146	EIF3H|RPL10|EEFSEC|EIF3L|EIF4H	0.00011	GO:0045182

## Sheet: vat_cluster2
# background genes	# genes	category	description	FDR value	genes	p-value	term name
42	19	GO Cellular Component	Mitochondrion	3.45e-12	NDUFB1|NDUFA3|ATP5MF|TOMM7|HSPE1|ACSF2|CCDC58|ATP5IF1|NDUFB9|CHCHD3|NDUFS4|COX17|COX7C|ATP5PD|ATP5PF|NDUFV2|NDUFC2|NDUFA5|NDUFB6	8.58e-15	GO:0005739
13	13	KEGG Pathways	Oxidative phosphorylation	2.2e-10	NDUFB1|NDUFA3|ATP5MF|NDUFB9|NDUFS4|COX17|COX7C|ATP5PD|ATP5PF|NDUFV2|NDUFC2|NDUFA5|NDUFB6	1.3e-12	ssc00190
9	9	GO Cellular Component	Mitochondrial respirasome	4.26e-07	NDUFB1|NDUFA3|NDUFB9|NDUFS4|COX7C|NDUFV2|NDUFC2|NDUFA5|NDUFB6	1.06e-08	GO:0005746
18	11	GO Biological Process	Mitochondrion organization	3.52e-06	NDUFB1|NDUFA3|TOMM7|ATP5IF1|NDUFB9|CHCHD3|NDUFS4|COX17|NDUFC2|NDUFA5|NDUFB6	5.47e-09	GO:0007005
8	8	GO Biological Process	Oxidative phosphorylation	2.69e-05	ATP5MF|NDUFB9|COX7C|ATP5PD|ATP5PF|NDUFV2|NDUFC2|NDUFB6	8.69e-08	GO:0006119
7	6	GO Biological Process	Respiratory electron transport chain	0.0013	NDUFB9|COX7C|NDUFV2|NDUFC2|NDUFA5|NDUFB6	9.2e-06	GO:0022904
40	10	GO Biological Process	Protein-containing complex assembly	0.0038	NDUFB1|NDUFA3|TBCA|VBP1|NDUFB9|NDUFS4|COX17|NDUFC2|NDUFA5|NDUFB6	2.97e-05	GO:0065003
4	4	GO Biological Process	Mitochondrial electron transport, NADH to ubiquinone	0.0238	NDUFB9|NDUFV2|NDUFC2|NDUFB6	0.00026	GO:0006120
3	3	GO Cellular Component	Mitochondrial proton-transporting ATP synthase complex	0.027	ATP5MF|ATP5PD|ATP5PF	0.0018	GO:0005753

## Sheet: vat_cluster3
# background genes	# genes	category	description	FDR value	genes	p-value	term name
28	11	GO Biological Process	G protein-coupled receptor signaling pathway	1e-07	GNB3|GNAI3|ADRA2A|GNAI2|GNG8|HCAR2|GNA14|PTAFR|GNAT1|GABBR1|GRK2	6.46e-11	GO:0007186
6	6	GO Cellular Component	Heterotrimeric G-protein complex	5.76e-05	GNB3|GNAI3|GNAI2|GNG8|GNA14|GNAT1	1.43e-07	GO:0005834
6	5	KEGG Pathways	GABAergic synapse	0.00036	GNB3|GNAI3|GNAI2|GNG8|GABBR1	3.8e-06	ssc04727
10	6	GO Biological Process	Adenylate cyclase-modulating G protein-coupled receptor signaling pathway	0.00091	GNAI3|ADRA2A|GNAI2|GNA14|GNAT1|GABBR1	1.17e-06	GO:0007188
7	4	KEGG Pathways	cGMP-PKG signaling pathway	0.0024	GNAI3|ADRA2A|GNAI2|SLC25A6	0.00013	ssc04022
9	4	KEGG Pathways	cAMP signaling pathway	0.0032	GNAI3|GNAI2|HCAR2|GABBR1	0.00027	ssc04024
4	4	GO Molecular Function	G-protein beta/gamma-subunit complex binding	0.0056	GNAI3|GNAI2|GNA14|GNAT1	2.85e-05	GO:0031683
6	3	KEGG Pathways	Calcium signaling pathway	0.0123	GNA14|SLC25A6|PTAFR	0.0014	ssc04020
5	4	GO Biological Process	Purinergic nucleotide receptor signaling pathway	0.0147	GNAI2|HCAR2|PTAFR|GNAT1	5.05e-05	GO:0035590
7	3	KEGG Pathways	Parathyroid hormone synthesis, secretion and action	0.0164	GNAI3|GNAI2|MMP25	0.002	ssc04928
8	3	KEGG Pathways	Neuroactive ligand-receptor interaction	0.0211	ADRA2A|PTAFR|GABBR1	0.0028	ssc04080
2	2	KEGG Pathways	Taste transduction	0.0329	GNB3|GABBR1	0.0045	ssc04742
2	2	KEGG Pathways	Renin secretion	0.0329	GNAI3|GNAI2	0.0045	ssc04924
59	7	GO Molecular Function	Carbohydrate derivative binding	0.0487	GNAI3|GNAI2|HCAR2|GNA14|PTAFR|GNAT1|GRK2	0.00099	GO:0097367

## Sheet: vat_cluster4
# background genes	# genes	category	description	FDR value	genes	p-value	term name
5	5	KEGG Pathways	Protein digestion and absorption	0.00015	COL27A1|COL22A1|COL7A1|COL6A1|COL1A1	8.66e-07	ssc04974
56	9	GO Cellular Component	Extracellular region	0.00034	COL27A1|COL22A1|ASPN|COL7A1|AEBP1|COL6A5|MGP|COL6A1|COL1A1	1.35e-06	GO:0005576
7	5	GO Molecular Function	Extracellular matrix structural constituent	0.001	COL27A1|COL22A1|COL7A1|COL6A5|COL1A1	2.65e-06	GO:0005201
36	6	GO Cellular Component	Extracellular space	0.0189	COL27A1|COL22A1|ASPN|COL6A5|COL6A1|COL1A1	0.00019	GO:0005615

## Sheet: vat_cluster5
# background genes	# genes	category	description	FDR value	genes	p-value	term name
9	7	GO Cellular Component	Spliceosomal complex	1.22e-06	SNRPF|SNRPE|PPIL2|RNF113A|SNRPA1|LSM8|SNRPD2	3.03e-09	GO:0005681
4	4	GO Cellular Component	U2-type precatalytic spliceosome	0.00044	SNRPE|SNRPA1|LSM8|SNRPD2	9.84e-06	GO:0071005
24	6	GO Molecular Function	RNA binding	0.0051	SNRPF|SPACA6|NAA38|SNRPE|SNRPA1|LSM8	1.29e-05	GO:0003723
3	3	GO Cellular Component	U1 snRNP	0.0062	SNRPF|SNRPE|SNRPD2	0.00017	GO:0005685
51	6	GO Cellular Component	Catalytic complex	0.0152	SNRPF|NAA38|SNRPE|PPIL2|SNRPA1|SNRPD2	0.00061	GO:1902494

## Sheet: vat_cluster6
# background genes	# genes	category	description	FDR value	genes	p-value	term name
56	6	GO Cellular Component	Extracellular region	0.0015	FBLN5|LOX|MEGF6|DPT|MFAP4|MFAP5	3.83e-06	GO:0005576
22	4	GO Cellular Component	Extracellular matrix	0.0195	FBLN5|LOX|MFAP4|MFAP5	9.68e-05	GO:0031012
13	4	GO Biological Process	Extracellular matrix organization	0.0246	FBLN5|LOX|DPT|MFAP4	1.59e-05	GO:0030198

## Sheet: clusters_vat_node_info
name	cluster	display name	degree.layout	adj.P.Val	log2FC	stringdb::description	gene_biotype	Gene_id
9823.ENSSSCP00000049299	1	RPS27A	17	0.00300518	1.00072	Ubiquitin-like domain-containing protein.	protein_coding	ENSSSCG00000034617
9823.ENSSSCP00000041630	1	RPS24	17	0.0112817	1.04352	40S ribosomal protein S24; Belongs to the eukaryotic ribosomal protein eS24 family.	protein_coding	ENSSSCG00000039544
9823.ENSSSCP00000003080	1	PDCD5	8	0.0029273	1.03658	Programmed cell death 5.	protein_coding	ENSSSCG00000002860
9823.ENSSSCP00000035267	1	RPL10	16	0.0306301	-1.8663	60S ribosomal protein L10; Component of the large ribosomal subunit. Plays a role in the formation of actively translating ribosomes. May play a role in the embryonic brain development.	protein_coding	ENSSSCG00000035997
9823.ENSSSCP00000041998	1	RPS15A	16	0.0029273	1.04395	Ribosomal protein S15a; Belongs to the universal ribosomal protein uS8 family.	protein_coding	ENSSSCG00000035768
9823.ENSSSCP00000050735	1	RPL17-C18orf32	16	0.00334279	1.03578	60S ribosomal protein L17 isoform a; Belongs to the universal ribosomal protein uL22 family.	protein_coding	ENSSSCG00000035007
9823.ENSSSCP00000032171	1	RPL23A	17	0.00919486	1.02598	Ribosomal protein L23a; Belongs to the universal ribosomal protein uL23 family.	protein_coding	ENSSSCG00000035080
9823.ENSSSCP00000039109	1	RPL23	17	0.0029273	1.14704	60S ribosomal protein L23; Belongs to the universal ribosomal protein uL14 family.	protein_coding	ENSSSCG00000038880
9823.ENSSSCP00000036235	1	RPS19	17	0.0115377	1.03044	40S ribosomal protein S19; Required for pre-rRNA processing and maturation of 40S ribosomal subunits; Belongs to the eukaryotic ribosomal protein eS19 family.	protein_coding	ENSSSCG00000003042
9823.ENSSSCP00000009753	1	RPL34	18	0.0033408	1.03189	60S ribosomal protein L34; Component of the large ribosomal subunit.	protein_coding	ENSSSCG00000009146
9823.ENSSSCP00000005385	1	RPL36AL	16	0.00334279	1.3087	60S ribosomal protein L36a.	protein_coding	ENSSSCG00000005006
9823.ENSSSCP00000042178	1	NEDD8	9	0.00469366	1.02075	NEDD8 ubiquitin like modifier.	protein_coding	ENSSSCG00000031938
9823.ENSSSCP00000073054	1	NACAD	11	0.0359438	-1.69884	NAC-A/B domain-containing protein.	protein_coding	ENSSSCG00000016733
9823.ENSSSCP00000029600	1	NACA	14	0.0041093	1.0028	Uncharacterized protein.	protein_coding	ENSSSCG00000020830
9823.ENSSSCP00000020253	1	RPS17	14	0.00539494	1.03609	40S ribosomal protein S17; Belongs to the eukaryotic ribosomal protein eS17 family.	protein_coding	ENSSSCG00000027358
9823.ENSSSCP00000061617	1	RPL36A-HNRNPH2	16	0.0350309	1.20592	RPL36A-HNRNPH2 readthrough; Belongs to the eukaryotic ribosomal protein eL42 family.	protein_coding	ENSSSCG00000039046
9823.ENSSSCP00000060117	1	RPL37	15	0.010031	1.42467	Ribosomal protein L37; Binds to the 23S rRNA.	protein_coding	ENSSSCG00000033326
9823.ENSSSCP00000046039	1	RPS29	16	0.00300518	1.05582	40S ribosomal protein S29.	protein_coding	ENSSSCG00000038507
9823.ENSSSCP00000044686	1	EIF3L	10	0.0214388	-2.24731	Eukaryotic translation initiation factor 3 subunit L; Component of the eukaryotic translation initiation factor 3 (eIF-3) complex, which is required for several steps in the initiation of protein synthesis. The eIF-3 complex associates with the 40S ribosome and facilitates the recruitment of eIF-1, eIF-1A, eIF- 2:GTP:methionyl-tRNAi and eIF-5 to form the 43S pre-initiation complex (43S PIC). The …	protein_coding	ENSSSCG00000000119
9823.ENSSSCP00000006426	1	EIF3H	11	0.0113277	1.72697	Eukaryotic translation initiation factor 3 subunit H; Component of the eukaryotic translation initiation factor 3 (eIF-3) complex, which is required for several steps in the initiation of protein synthesis. The eIF-3 complex associates with the 40S ribosome and facilitates the recruitment of eIF-1, eIF-1A, eIF- 2:GTP:methionyl-tRNAi and eIF-5 to form the 43S pre-initiation complex (43S PIC). The …	protein_coding	ENSSSCG00000006016
9823.ENSSSCP00000043782	1	EEFSEC	11	0.00752504	-1.181	Eukaryotic elongation factor, selenocysteine-tRNA specific.	protein_coding	ENSSSCG00000011619
9823.ENSSSCP00000066653	1	EIF4H	3	0.0041093	-1.01995	RRM domain-containing protein.	protein_coding	ENSSSCG00000025966
9823.ENSSSCP00000040435	1	COPS5	6	0.023182	1.68965	COP9 signalosome subunit 5.	protein_coding	ENSSSCG00000006203
9823.ENSSSCP00000016264	1	SEM1	3	0.0311506	1.00451	Uncharacterized protein.	protein_coding	ENSSSCG00000015337
9823.ENSSSCP00000026203	1	SLC16A3	1	0.016754	-1.01762	Solute carrier family 16 member 3.	protein_coding	ENSSSCG00000024018
9823.ENSSSCP00000034746	1	RNF34	1	0.0300311	1.2929	E3 ubiquitin-protein ligase RNF34 isoform 2.	protein_coding	ENSSSCG00000037811
9823.ENSSSCP00000061150	1	HGS	1	0.0029273	-1.15577	Hepatocyte growth factor-regulated tyrosine kinase substrate; Involved in intracellular signal transduction mediated by cytokines and growth factors. When associated with STAM, it suppresses DNA signaling upon stimulation by IL-2 and GM-CSF. Could be a direct effector of PI3-kinase in vesicular pathway via early endosomes and may regulate trafficking to early and late endosomes by recruiting clat…	protein_coding	ENSSSCG00000033082
9823.ENSSSCP00000046426	1	SBSN	1	0.0124377	-1.40815	Suprabasin.	protein_coding	ENSSSCG00000033702
9823.ENSSSCP00000065481	1	NUDT7	1	0.0335262	1.16257	Nudix hydrolase 7.	protein_coding	ENSSSCG00000002697
9823.ENSSSCP00000063657	1	ZNRF3	1	0.0134506	-1.05571	Zinc and ring finger 3.	protein_coding	ENSSSCG00000009971
9823.ENSSSCP00000048132	2	COX7C	12	0.0167608	1.07209	Cytochrome c oxidase subunit 7C, mitochondrial; Component of the cytochrome c oxidase, the last enzyme in the mitochondrial electron transport chain which drives oxidative phosphorylation. The respiratory chain contains 3 multisubunit complexes succinate dehydrogenase (complex II, CII), ubiquinol- cytochrome c oxidoreductase (cytochrome b-c1 complex, complex III, CIII) and cytochrome c oxidase (c…	protein_coding	ENSSSCG00000040325
9823.ENSSSCP00000002650	2	NDUFB1	10	0.0127801	1.08247	Uncharacterized protein.	protein_coding	ENSSSCG00000002449
9823.ENSSSCP00000047675	2	COX17	8	0.0172279	1.06345	Cytochrome c oxidase copper chaperone; Copper metallochaperone essential for the assembly of the mitochondrial respiratory chain complex IV (CIV), also known as cytochrome c oxidase. Binds two copper ions and delivers them to the metallochaperone SCO1 which transports the copper ions to the Cu(A) site on the cytochrome c oxidase subunit II (MT-CO2/COX2).	protein_coding	ENSSSCG00000011893
9823.ENSSSCP00000051036	2	ATP5PF	10	0.0113277	1.03876	ATP synthase-coupling factor 6, mitochondrial; Mitochondrial membrane ATP synthase (F(1)F(0) ATP synthase or Complex V) produces ATP from ADP in the presence of a proton gradient across the membrane which is generated by electron transport complexes of the respiratory chain. F-type ATPases consist of two structural domains, F(1) - containing the extramembraneous catalytic core and F(0) - containi…	protein_coding	ENSSSCG00000038399
9823.ENSSSCP00000008142	2	ATP5MF	11	0.0217432	1.12008	ATP synthase subunit f, mitochondrial; Mitochondrial membrane ATP synthase (F(1)F(0) ATP synthase or Complex V) produces ATP from ADP in the presence of a proton gradient across the membrane which is generated by electron transport complexes of the respiratory chain. F-type ATPases consist of two structural domains, F(1) - containing the extramembraneous catalytic core and F(0) - containing the m…	protein_coding	ENSSSCG00000034019
9823.ENSSSCP00000055099	2	NDUFV2	11	0.0158658	1.25897	NADH dehydrogenase ubiquinone flavoprotein 2, mitochondrial.	protein_coding	ENSSSCG00000038826
9823.ENSSSCP00000045169	2	NDUFS4	11	0.0188585	1.00956	NADH:ubiquinone oxidoreductase subunit S4.	protein_coding	ENSSSCG00000016893
9823.ENSSSCP00000074469	2	NDUFB6	11	0.0204266	1.00827	NADH dehydrogenase [ubiquinone] 1 beta subcomplex subunit 6; Accessory subunit of the mitochondrial membrane respiratory chain NADH dehydrogenase (Complex I), that is believed not to be involved in catalysis. Complex I functions in the transfer of electrons from NADH to the respiratory chain. The immediate electron acceptor for the enzyme is believed to be ubiquinone.	protein_coding	ENSSSCG00000011003
9823.ENSSSCP00000003537	2	NDUFA3	9	0.0452057	1.33251	Uncharacterized protein.	protein_coding	ENSSSCG00000003261
9823.ENSSSCP00000074245	2	NDUFA5	11	0.0232819	1.1296	NADH:ubiquinone oxidoreductase subunit A5.	protein_coding	ENSSSCG00000037869
9823.ENSSSCP00000030827	2	NDUFB9	11	0.0172279	1.19641	NADH:ubiquinone oxidoreductase subunit B9; Belongs to the complex I LYR family.	protein_coding	ENSSSCG00000005976
9823.ENSSSCP00000069216	2	NDUFC2	11	0.0158692	1.24792	NADH dehydrogenase [ubiquinone] 1 subunit C2; Accessory subunit of the mitochondrial membrane respiratory chain NADH dehydrogenase (Complex I), that is believed not to be involved in catalysis. Complex I functions in the transfer of electrons from NADH to the respiratory chain. The immediate electron acceptor for the enzyme is believed to be ubiquinone.	protein_coding	ENSSSCG00000039494
9823.ENSSSCP00000017034	2	HSPE1	5	0.0323999	1.38121	Uncharacterized protein; Belongs to the GroES chaperonin family.	protein_coding	ENSSSCG00000016078
9823.ENSSSCP00000009445	2	CPE	1	0.00531049	1.21202	Carboxypeptidase E.	protein_coding	ENSSSCG00000008854
9823.ENSSSCP00000016311	2	TOMM7	2	0.00807762	1.07087	Mitochondrial import receptor subunit TOM7 homolog; Required for assembly and stability of the TOM complex (By similarity). Positive regulator of PRKN translocation to damaged mitochondria. Acts probably by stabilizing PINK1 on the outer membrane of depolarized mitochondria (By similarity).	protein_coding	ENSSSCG00000015384
9823.ENSSSCP00000023669	2	ATP5IF1	3	0.016754	1.25508	ATPase inhibitor, mitochondrial; Endogenous F(1)F(o)-ATPase inhibitor limiting ATP depletion when the mitochondrial membrane potential falls below a threshold and the F(1)F(o)-ATP synthase starts hydrolyzing ATP to pump protons out of the mitochondrial matrix. Required to avoid the consumption of cellular ATP when the F(1)F(o)-ATP synthase enzyme acts as an ATP hydrolase. Indirectly acts as a reg…	protein_coding	ENSSSCG00000027072
9823.ENSSSCP00000049868	2	ATP5PD	9	0.0279477	1.01905	ATP synthase subunit d, mitochondrial; Mitochondrial membrane ATP synthase (F(1)F(0) ATP synthase or Complex V) produces ATP from ADP in the presence of a proton gradient across the membrane which is generated by electron transport complexes of the respiratory chain. F-type ATPases consist of two structural domains, F(1) - containing the extramembraneous catalytic core, and F(0) - containing the …	protein_coding	ENSSSCG00000032166
9823.ENSSSCP00000014993	2	TBCA	1	0.0029273	1.03763	Tubulin-specific chaperone A; Belongs to the TBCA family.	protein_coding	ENSSSCG00000014100
9823.ENSSSCP00000029596	2	VBP1	3	0.0239422	1.11449	Prefoldin subunit 3; Binds specifically to cytosolic chaperonin (c-CPN) and transfers target proteins to it. Binds to nascent polypeptide chain and promotes folding in an environment in which there are many competing pathways for nonnative proteins; Belongs to the prefoldin subunit alpha family.	protein_coding	ENSSSCG00000012811
9823.ENSSSCP00000018615	2	ACSF2	3	0.023182	-1.25585	Acyl-CoA synthetase family member 2.	protein_coding	ENSSSCG00000017566
9823.ENSSSCP00000022299	2	CCDC58	4	0.0261182	1.15821	Coiled-coil domain containing 58.	protein_coding	ENSSSCG00000025107
9823.ENSSSCP00000035237	2	CHCHD3	2	0.0280977	1.0297	MICOS complex subunit; Component of the MICOS complex, a large protein complex of the mitochondrial inner membrane that plays crucial roles in the maintenance of crista junctions, inner membrane architecture, and formation of contact sites to the outer membrane.	protein_coding	ENSSSCG00000016545
9823.ENSSSCP00000045631	2	FAM180A	1	0.0333195	1.24621	Family with sequence similarity 180 member A.	protein_coding	ENSSSCG00000036403
9823.ENSSSCP00000067853	2	VAPA	1	0.045381	2.35261	VAMP associated protein A.	protein_coding	ENSSSCG00000038465
9823.ENSSSCP00000000727	3	GNB3	9	0.0130103	-1.4476	Guanine nucleotide-binding protein G(I)/G(S)/G(T) subunit beta-3 isoform 1.	protein_coding	ENSSSCG00000000682
9823.ENSSSCP00000011323	3	ADRA2A	3	0.0331712	-1.95939	Alpha-2A adrenergic receptor; Alpha-2 adrenergic receptors mediate the catecholamine- induced inhibition of adenylate cyclase through the action of G proteins.	protein_coding	ENSSSCG00000010629
9823.ENSSSCP00000050259	3	RGS19	7	0.0160397	-1.20985	Regulator of G protein signaling 19.	protein_coding	ENSSSCG00000034841
9823.ENSSSCP00000072808	3	GRK2	5	0.0025013	-1.36962	G protein-coupled receptor kinase 2.	protein_coding	ENSSSCG00000012918
9823.ENSSSCP00000070651	3	GABBR1	4	0.00726009	-1.20276	Gamma-aminobutyric acid type B receptor subunit 1.	protein_coding	ENSSSCG00000001242
9823.ENSSSCP00000025202	3	GNG8	9	0.025555	-1.61921	Guanine nucleotide-binding protein subunit gamma; Guanine nucleotide-binding proteins (G proteins) are involved as a modulator or transducer in various transmembrane signaling systems. The beta and gamma chains are required for the GTPase activity, for replacement of GDP by GTP, and for G protein-effector interaction.	protein_coding	ENSSSCG00000022068
9823.ENSSSCP00000059180	3	GNAT1	3	0.0193979	-1.16644	Guanine nucleotide-binding protein G(T) subunit alpha-1 isoform X2.	protein_coding	ENSSSCG00000042718
9823.ENSSSCP00000044240	3	GNA14	7	0.0340749	-1.46845	Guanine nucleotide-binding protein alpha 14.	protein_coding	ENSSSCG00000005284
9823.ENSSSCP00000007279	3	GNAI3	8	0.0155495	1.4834	Guanine nucleotide-binding protein G(K) subunit alpha.	protein_coding	ENSSSCG00000006824
9823.ENSSSCP00000012152	3	GNAI2	10	0.0025013	-1.52452	G protein subunit alpha i2.	protein_coding	ENSSSCG00000011399
9823.ENSSSCP00000040811	3	HCAR2	2	0.0421013	1.10811	Hydroxycarboxylic acid receptor 2; Belongs to the G-protein coupled receptor 1 family.	protein_coding	ENSSSCG00000037735
9823.ENSSSCP00000022899	3	MMP25	2	0.02516	-1.88467	Matrix metallopeptidase 25.	protein_coding	ENSSSCG00000021569
9823.ENSSSCP00000048214	3	SLC25A6	1	0.0489393	2.91945	ADP/ATP translocase 3, N-terminally processed; Catalyzes the exchange of cytoplasmic ADP with mitochondrial ATP across the mitochondrial inner membrane. May participate in the formation of the permeability transition pore complex (PTPC) responsible for the release of mitochondrial products that triggers apoptosis (By similarity).	protein_coding	ENSSSCG00000033673
9823.ENSSSCP00000049322	3	PTAFR	2	0.0394556	-1.26003	Platelet-activating factor receptor; Receptor for platelet activating factor, a chemotactic phospholipid mediator that possesses potent inflammatory, smooth-muscle contractile and hypotensive activity. Seems to mediate its action via a G protein that activates a phosphatidylinositol-calcium second messenger system. May have a role in peri-implantation development during pregnancy (By similarity);…	protein_coding	ENSSSCG00000031788
9823.ENSSSCP00000005883	4	COL27A1	5	0.0041093	-1.08339	Collagen type XXVII alpha 1 chain.	protein_coding	ENSSSCG00000005487
9823.ENSSSCP00000012108	4	COL7A1	7	0.0041093	-1.14257	Uncharacterized protein.	protein_coding	ENSSSCG00000011355
9823.ENSSSCP00000066291	4	COL1A1	8	0.04967	-1.39499	Collagen type I alpha 1 chain.	protein_coding	ENSSSCG00000036135
9823.ENSSSCP00000056442	4	COL6A5	7	0.0173401	-1.3691	Collagen type VI alpha 5 chain.	protein_coding	ENSSSCG00000011186
9823.ENSSSCP00000066198	4	COL6A1	7	0.0163348	-1.4198	Collagen type VI alpha 1 chain.	protein_coding	ENSSSCG00000022506
9823.ENSSSCP00000006349	4	COL22A1	5	0.0386997	-1.13371	Collagen type XXII alpha 1 chain.	protein_coding	ENSSSCG00000005938
9823.ENSSSCP00000008621	4	ASPN	3	0.00690912	1.17815	Asporin.	protein_coding	ENSSSCG00000008072
9823.ENSSSCP00000035562	4	SEC16A	2	0.0318892	-1.12741	Protein transport protein sec16; Plays a role in the organization of the endoplasmic reticulum exit sites (ERES), also known as transitional endoplasmic reticulum (tER). Required for secretory cargo traffic from the endoplasmic reticulum to the Golgi apparatus.	protein_coding	ENSSSCG00000034854
9823.ENSSSCP00000030309	4	MCFD2	2	0.0127801	1.21459	Multiple coagulation factor deficiency 2.	protein_coding	ENSSSCG00000021325
9823.ENSSSCP00000017744	4	AEBP1	1	0.0483233	-1.32774	Adipocyte enhancer-binding protein 1.	protein_coding	ENSSSCG00000016754
9823.ENSSSCP00000049288	4	TAGLN	2	0.0286265	1.37036	Transgelin; Belongs to the calponin family.	protein_coding	ENSSSCG00000015073
9823.ENSSSCP00000065033	4	MGP	1	6.91042e-05	2.08625	Matrix Gla protein; Associates with the organic matrix of bone and cartilage. Thought to act as an inhibitor of bone formation.	protein_coding	ENSSSCG00000037697
9823.ENSSSCP00000000025	5	PARVB	1	0.0379488	-1.27042	Parvin beta.	protein_coding	ENSSSCG00000000024
9823.ENSSSCP00000057293	5	RNF113A	8	0.0201782	1.02708	Ring finger protein 113A.	protein_coding	ENSSSCG00000032973
9823.ENSSSCP00000000958	5	SNRPF	9	0.0324179	1.01202	Sm domain-containing protein.	protein_coding	ENSSSCG00000000895
9823.ENSSSCP00000012374	5	NUP210	2	0.0327527	-1.20494	Nucleoporin 210.	protein_coding	ENSSSCG00000011610
9823.ENSSSCP00000049137	5	PPIL2	5	0.0251026	1.33661	Peptidyl-prolyl cis-trans isomerase-like 2 isoform X1.	protein_coding	ENSSSCG00000010083
9823.ENSSSCP00000003514	5	SPACA6	6	0.00537294	-1.26144	Sperm acrosome associated 6.	protein_coding	ENSSSCG00000003238
9823.ENSSSCP00000019038	5	NAA38	6	0.0448999	1.55175	Sm domain-containing protein.	protein_coding	ENSSSCG00000017971
9823.ENSSSCP00000068189	5	LSM8	6	0.021703	1.09791	U6 snRNA-associated Sm-like protein LSm8; Plays role in pre-mRNA splicing as component of the U4/U6-U5 tri-snRNP complex that is involved in spliceosome assembly, and as component of the precatalytic spliceosome (spliceosome B complex). The heptameric LSM2-8 complex binds specifically to the 3'-terminal U-tract of U6 snRNA.	protein_coding	ENSSSCG00000021652
9823.ENSSSCP00000064487	5	SNRPA1	8	0.0195833	-2.96324	Small nuclear ribonucleoprotein polypeptide A.	protein_coding	ENSSSCG00000005786
9823.ENSSSCP00000069224	5	SNRPD2	8	0.0106561	1.13276	Small nuclear ribonucleoprotein Sm D2; Plays role in pre-mRNA splicing as core component of the SMN- Sm complex that mediates spliceosomal snRNP assembly and as component of the spliceosomal U1, U2, U4 and U5 small nuclear ribonucleoproteins (snRNPs), the building blocks of the spliceosome. Component of both the pre-catalytic spliceosome B complex and activated spliceosome C complexes. Is also a …	protein_coding	ENSSSCG00000033500
9823.ENSSSCP00000022254	5	SNRPE	9	0.0320115	1.1323	Small nuclear ribonucleoprotein E; Plays role in pre-mRNA splicing as core component of the SMN- Sm complex that mediates spliceosomal snRNP assembly and as component of the spliceosomal U1, U2, U4 and U5 small nuclear ribonucleoproteins (snRNPs), the building blocks of the spliceosome. Component of both the pre-catalytic spliceosome B complex and activated spliceosome C complexes. Is also a comp…	protein_coding	ENSSSCG00000023562
9823.ENSSSCP00000071547	6	MFAP5	4	0.0442947	1.40256	Microfibril associated protein 5.	protein_coding	ENSSSCG00000031712
9823.ENSSSCP00000002645	6	FBLN5	4	0.0258467	1.38574	Fibulin-5 isoform X2.	protein_coding	ENSSSCG00000002444
9823.ENSSSCP00000035407	6	DPT	3	0.0106121	1.24614	Dermatopontin; Seems to mediate adhesion by cell surface integrin binding. May serve as a communication link between the dermal fibroblast cell surface and its extracellular matrix environment. Enhances TGFB1 activity. Inhibits cell proliferation (By similarity). Accelerates collagen fibril formation, and stabilizes collagen fibrils against low- temperature dissociation.	protein_coding	ENSSSCG00000035937
9823.ENSSSCP00000049633	6	MFAP4	3	0.0268713	1.30188	Microfibril associated protein 4.	protein_coding	ENSSSCG00000036007
9823.ENSSSCP00000015138	6	LOX	3	0.00802666	1.16742	Protein-lysine 6-oxidase, short form; Responsible for the post-translational oxidative deamination of peptidyl lysine residues in precursors to fibrous collagen and elastin. Regulator of Ras expression. May play a role in tumor suppression. Plays a role in the aortic wall architecture (By similarity); Belongs to the lysyl oxidase family.	protein_coding	ENSSSCG00000014232
9823.ENSSSCP00000028064	6	MEGF6	1	0.0440761	-1.0383	Multiple EGF like domains 6.	protein_coding	ENSSSCG00000024678
9823.ENSSSCP00000036513	7	FABP4	2	0.0445907	1.27142	Fatty acid-binding protein, adipocyte; Lipid transport protein in adipocytes. Binds both long chain fatty acids and retinoic acid. Delivers long-chain fatty acids and retinoic acid to their cognate receptors in the nucleus (By similarity). Involved in the regulation of intramuscular fat accretion ; Belongs to the calycin superfamily. Fatty-acid binding protein (FABP) family.	protein_coding	ENSSSCG00000040681
9823.ENSSSCP00000010358	7	HPGD	1	0.0162624	1.20862	15-hydroxyprostaglandin dehydrogenase NAD(+) isoform 1; Belongs to the short-chain dehydrogenases/reductases (SDR) family.	protein_coding	ENSSSCG00000009699
9823.ENSSSCP00000021647	7	FASN	4	0.0300941	-1.60641	Uncharacterized protein.	protein_coding	ENSSSCG00000029944
9823.ENSSSCP00000043674	7	CCDC57	1	0.00943511	-1.06695	Uncharacterized protein.	protein_coding	ENSSSCG00000029553
9823.ENSSSCP00000049669	7	SLC27A1	2	0.0142861	-1.01832	Solute carrier family 27 (Fatty acid transporter), member 1.	protein_coding	ENSSSCG00000013879

## Sheet: clusters_vat_edge_info
name	stringdb::coexpression	stringdb::cooccurrence	stringdb::databases	stringdb::experiments	stringdb::fusion	stringdb::interspecies	stringdb::neighborhood	stringdb::score	stringdb::textmining
9823.ENSSSCP00000000025 (pp) 9823.ENSSSCP00000057293	0	0	0	0	0		0	0.608	0.608
9823.ENSSSCP00000057293 (pp) 9823.ENSSSCP00000069224	0	0	0.36	0.809	0		0	0.877	0.077
9823.ENSSSCP00000057293 (pp) 9823.ENSSSCP00000064487	0	0	0.36	0.811	0		0	0.885	0.129
9823.ENSSSCP00000049299 (pp) 9823.ENSSSCP00000065481	0	0	0.5	0	0		0	0.499	0
9823.ENSSSCP00000049299 (pp) 9823.ENSSSCP00000063657	0	0	0.5	0.161	0		0	0.564	0.046
9823.ENSSSCP00000049299 (pp) 9823.ENSSSCP00000073054	0.583	0	0	0.058	0		0	0.599	0.063
9823.ENSSSCP00000049299 (pp) 9823.ENSSSCP00000050735	0.546	0	0	0.66	0		0	0.842	0.063
9823.ENSSSCP00000049299 (pp) 9823.ENSSSCP00000061150	0	0	0.5	0.701	0		0	0.844	0.044
9823.ENSSSCP00000049299 (pp) 9823.ENSSSCP00000061617	0.55	0	0	0.597	0		0	0.854	0.26
9823.ENSSSCP00000049299 (pp) 9823.ENSSSCP00000060117	0.784	0	0	0.83	0		0	0.967	0.182
9823.ENSSSCP00000000727 (pp) 9823.ENSSSCP00000011323	0.044	0	0.5	0.3	0		0	0.653	0.086
9823.ENSSSCP00000000727 (pp) 9823.ENSSSCP00000050259	0.066	0	0.5	0.247	0		0	0.659	0.146
9823.ENSSSCP00000000727 (pp) 9823.ENSSSCP00000072808	0.068	0	0.5	0.304	0		0	0.706	0.201
9823.ENSSSCP00000000727 (pp) 9823.ENSSSCP00000070651	0	0	0.65	0.212	0		0	0.713	0.046
9823.ENSSSCP00000000727 (pp) 9823.ENSSSCP00000025202	0.053	0	0.54	0.453	0		0	0.784	0.201
9823.ENSSSCP00000000727 (pp) 9823.ENSSSCP00000059180	0.187	0	0.5	0.433	0		0	0.859	0.463
9823.ENSSSCP00000000727 (pp) 9823.ENSSSCP00000044240	0.126	0	0.54	0.487	0		0	0.884	0.504
9823.ENSSSCP00000000727 (pp) 9823.ENSSSCP00000007279	0.187	0	0.65	0.461	0		0	0.896	0.402
9823.ENSSSCP00000000727 (pp) 9823.ENSSSCP00000012152	0.221	0	0.65	0.461	0		0	0.911	0.471
9823.ENSSSCP00000011323 (pp) 9823.ENSSSCP00000025202	0	0	0.5	0.114	0		0	0.538	0
9823.ENSSSCP00000011323 (pp) 9823.ENSSSCP00000012152	0	0	0.5	0.275	0		0	0.63	0.063
9823.ENSSSCP00000050259 (pp) 9823.ENSSSCP00000059180	0.057	0	0	0.303	0		0	0.428	0.2
9823.ENSSSCP00000050259 (pp) 9823.ENSSSCP00000072808	0.058	0	0	0	0		0	0.559	0.552
9823.ENSSSCP00000025202 (pp) 9823.ENSSSCP00000050259	0	0	0.5	0.042	0		0	0.513	0.066
9823.ENSSSCP00000025202 (pp) 9823.ENSSSCP00000072808	0	0	0.5	0.188	0		0	0.605	0.107
9823.ENSSSCP00000025202 (pp) 9823.ENSSSCP00000059180	0	0	0.5	0.288	0		0	0.65	0.096
9823.ENSSSCP00000025202 (pp) 9823.ENSSSCP00000070651	0	0	0.65	0.129	0		0	0.682	0
9823.ENSSSCP00000025202 (pp) 9823.ENSSSCP00000044240	0	0	0.54	0.313	0		0	0.705	0.144
9823.ENSSSCP00000044240 (pp) 9823.ENSSSCP00000050259	0	0	0.5	0.142	0		0	0.617	0.18
9823.ENSSSCP00000044240 (pp) 9823.ENSSSCP00000049322	0.084	0	0.65	0.118	0		0	0.704	0.077
9823.ENSSSCP00000044240 (pp) 9823.ENSSSCP00000072808	0	0	0.5	0.486	0		0	0.782	0.222
9823.ENSSSCP00000007279 (pp) 9823.ENSSSCP00000044240	0.051	0.068	0.54	0.065	0		0	0.575	0.055
9823.ENSSSCP00000007279 (pp) 9823.ENSSSCP00000050259	0.074	0	0.5	0.303	0		0	0.681	0.129
9823.ENSSSCP00000007279 (pp) 9823.ENSSSCP00000040811	0	0	0.65	0.11	0		0	0.682	0.063
9823.ENSSSCP00000007279 (pp) 9823.ENSSSCP00000025202	0	0	0.65	0.288	0		0	0.763	0.129
9823.ENSSSCP00000007279 (pp) 9823.ENSSSCP00000012152	0	0.049	0.9	0	0		0	0.901	0.049
9823.ENSSSCP00000007279 (pp) 9823.ENSSSCP00000022899	0	0	0.9	0	0		0	0.902	0.067
9823.ENSSSCP00000007279 (pp) 9823.ENSSSCP00000070651	0	0	0.9	0.299	0		0	0.929	0.075
9823.ENSSSCP00000012152 (pp) 9823.ENSSSCP00000048214	0.109	0	0	0.05	0		0	0.494	0.45
9823.ENSSSCP00000012152 (pp) 9823.ENSSSCP00000044240	0.051	0.069	0.54	0.065	0		0	0.575	0.055
9823.ENSSSCP00000012152 (pp) 9823.ENSSSCP00000040811	0	0	0.65	0.11	0		0	0.682	0.063
9823.ENSSSCP00000012152 (pp) 9823.ENSSSCP00000050259	0.109	0	0.5	0.303	0		0	0.693	0.129
9823.ENSSSCP00000012152 (pp) 9823.ENSSSCP00000025202	0	0	0.65	0.288	0		0	0.763	0.129
9823.ENSSSCP00000012152 (pp) 9823.ENSSSCP00000022899	0	0	0.9	0	0		0	0.902	0.067
9823.ENSSSCP00000012152 (pp) 9823.ENSSSCP00000070651	0.051	0	0.9	0.299	0		0	0.93	0.075
9823.ENSSSCP00000000958 (pp) 9823.ENSSSCP00000012374	0	0	0.4	0	0		0	0.456	0.131
9823.ENSSSCP00000000958 (pp) 9823.ENSSSCP00000049137	0.066	0	0	0.535	0		0	0.547	0
9823.ENSSSCP00000000958 (pp) 9823.ENSSSCP00000003514	0.192	0	0	0.597	0		0	0.737	0.26
9823.ENSSSCP00000000958 (pp) 9823.ENSSSCP00000019038	0.192	0	0	0.597	0		0	0.737	0.26
9823.ENSSSCP00000000958 (pp) 9823.ENSSSCP00000057293	0	0	0.36	0.809	0		0	0.882	0.113
9823.ENSSSCP00000000958 (pp) 9823.ENSSSCP00000068189	0.478	0	0.36	0.879	0		0	0.977	0.514
9823.ENSSSCP00000000958 (pp) 9823.ENSSSCP00000064487	0.285	0	0.5	0.953	0		0	0.985	0.238
9823.ENSSSCP00000000958 (pp) 9823.ENSSSCP00000069224	0.902	0	0.9	0.953	0		0	0.999	0.473
9823.ENSSSCP00000000958 (pp) 9823.ENSSSCP00000022254	0.892	0	0.9	0.953	0		0	0.999	0.514
9823.ENSSSCP00000041630 (pp) 9823.ENSSSCP00000042178	0.281	0	0	0.296	0		0	0.486	0.067
9823.ENSSSCP00000041630 (pp) 9823.ENSSSCP00000043782	0.152	0	0	0.452	0		0.065	0.54	0.068
9823.ENSSSCP00000041630 (pp) 9823.ENSSSCP00000073054	0.551	0	0	0.06	0		0	0.573	0.07
9823.ENSSSCP00000041630 (pp) 9823.ENSSSCP00000061617	0.521	0	0	0.514	0		0	0.788	0.165
9823.ENSSSCP00000041630 (pp) 9823.ENSSSCP00000044686	0.104	0	0.5	0.553	0		0	0.789	0.071
9823.ENSSSCP00000041630 (pp) 9823.ENSSSCP00000050735	0.522	0	0	0.553	0		0	0.797	0.129
9823.ENSSSCP00000041630 (pp) 9823.ENSSSCP00000060117	0.728	0	0	0.7	0		0	0.944	0.373
9823.ENSSSCP00000041630 (pp) 9823.ENSSSCP00000041998	0.635	0	0.8	0.597	0		0	0.976	0.287
9823.ENSSSCP00000041630 (pp) 9823.ENSSSCP00000049299	0.636	0	0.8	0.7	0		0	0.979	0.165
9823.ENSSSCP00000041630 (pp) 9823.ENSSSCP00000046039	0.785	0	0.8	0.7	0		0	0.989	0.3
9823.ENSSSCP00000012374 (pp) 9823.ENSSSCP00000022254	0	0	0.4	0	0		0	0.4	0
9823.ENSSSCP00000049137 (pp) 9823.ENSSSCP00000069224	0.066	0	0	0.535	0		0	0.547	0
9823.ENSSSCP00000049137 (pp) 9823.ENSSSCP00000064487	0	0	0	0.535	0		0	0.595	0.166
9823.ENSSSCP00000049137 (pp) 9823.ENSSSCP00000057293	0.052	0	0.8	0.535	0		0	0.913	0.13
9823.ENSSSCP00000003514 (pp) 9823.ENSSSCP00000057293	0	0	0	0.516	0		0	0.519	0.047
9823.ENSSSCP00000003514 (pp) 9823.ENSSSCP00000064487	0.084	0	0	0.473	0		0	0.561	0.164
9823.ENSSSCP00000003514 (pp) 9823.ENSSSCP00000022254	0.216	0	0	0.514	0		0	0.671	0.208
9823.ENSSSCP00000003514 (pp) 9823.ENSSSCP00000068189	0	0	0	0.592	0		0	0.685	0.26
9823.ENSSSCP00000003514 (pp) 9823.ENSSSCP00000069224	0.237	0	0	0.597	0		0	0.752	0.26
9823.ENSSSCP00000019038 (pp) 9823.ENSSSCP00000057293	0	0	0	0.516	0		0	0.519	0.047
9823.ENSSSCP00000019038 (pp) 9823.ENSSSCP00000064487	0.084	0	0	0.473	0		0	0.561	0.164
9823.ENSSSCP00000019038 (pp) 9823.ENSSSCP00000022254	0.216	0	0	0.514	0		0	0.671	0.208
9823.ENSSSCP00000019038 (pp) 9823.ENSSSCP00000068189	0	0	0	0.592	0		0	0.692	0.278
9823.ENSSSCP00000019038 (pp) 9823.ENSSSCP00000069224	0.237	0	0	0.597	0		0	0.752	0.26
9823.ENSSSCP00000068189 (pp) 9823.ENSSSCP00000069224	0.404	0	0.54	0.951	0		0	0.991	0.473
9823.ENSSSCP00000064487 (pp) 9823.ENSSSCP00000068189	0.118	0	0.36	0.843	0		0	0.923	0.243
9823.ENSSSCP00000064487 (pp) 9823.ENSSSCP00000069224	0.151	0	0.54	0.953	0		0	0.988	0.429
9823.ENSSSCP00000022254 (pp) 9823.ENSSSCP00000049137	0.067	0	0	0.535	0		0	0.547	0
9823.ENSSSCP00000022254 (pp) 9823.ENSSSCP00000057293	0	0	0.36	0.809	0		0	0.872	0
9823.ENSSSCP00000022254 (pp) 9823.ENSSSCP00000068189	0.328	0	0.54	0.828	0		0	0.968	0.472
9823.ENSSSCP00000022254 (pp) 9823.ENSSSCP00000064487	0.281	0	0.54	0.953	0		0	0.989	0.403
9823.ENSSSCP00000022254 (pp) 9823.ENSSSCP00000069224	0.814	0	0.9	0.953	0		0	0.999	0.828
9823.ENSSSCP00000048132 (pp) 9823.ENSSSCP00000049868	0.593	0	0	0.049	0		0	0.642	0.151
9823.ENSSSCP00000048132 (pp) 9823.ENSSSCP00000051036	0.786	0	0	0	0		0	0.804	0.126
9823.ENSSSCP00000048132 (pp) 9823.ENSSSCP00000074245	0.538	0	0	0.821	0		0	0.931	0.238
9823.ENSSSCP00000048132 (pp) 9823.ENSSSCP00000055099	0.552	0	0	0.833	0		0	0.935	0.209
9823.ENSSSCP00000048132 (pp) 9823.ENSSSCP00000069216	0.58	0	0	0.828	0		0	0.94	0.238
9823.ENSSSCP00000048132 (pp) 9823.ENSSSCP00000074469	0.558	0	0	0.821	0		0	0.948	0.394
9823.ENSSSCP00000002650 (pp) 9823.ENSSSCP00000047675	0.38	0	0	0	0		0	0.447	0.145
9823.ENSSSCP00000002650 (pp) 9823.ENSSSCP00000051036	0.393	0	0	0	0		0	0.494	0.201
9823.ENSSSCP00000002650 (pp) 9823.ENSSSCP00000008142	0.577	0	0	0	0		0	0.645	0.197
9823.ENSSSCP00000002650 (pp) 9823.ENSSSCP00000048132	0.279	0	0	0.828	0		0	0.928	0.465
9823.ENSSSCP00000002650 (pp) 9823.ENSSSCP00000055099	0.275	0	0.54	0.935	0		0	0.982	0.298
9823.ENSSSCP00000002650 (pp) 9823.ENSSSCP00000045169	0.408	0	0.54	0.896	0		0	0.982	0.458
9823.ENSSSCP00000002650 (pp) 9823.ENSSSCP00000074469	0.381	0	0.54	0.882	0		0	0.983	0.569
9823.ENSSSCP00000002650 (pp) 9823.ENSSSCP00000003537	0.124	0	0.8	0.882	0		0	0.987	0.469
9823.ENSSSCP00000002650 (pp) 9823.ENSSSCP00000074245	0.396	0	0.8	0.885	0		0	0.989	0.34
9823.ENSSSCP00000002650 (pp) 9823.ENSSSCP00000030827	0.186	0	0.8	0.906	0		0	0.99	0.441
9823.ENSSSCP00000002650 (pp) 9823.ENSSSCP00000069216	0.32	0	0.8	0.976	0		0	0.998	0.587
9823.ENSSSCP00000036513 (pp) 9823.ENSSSCP00000049669	0	0	0	0	0		0	0.444	0.444
9823.ENSSSCP00000002645 (pp) 9823.ENSSSCP00000035407	0.107	0	0	0.049	0		0	0.553	0.516
9823.ENSSSCP00000002645 (pp) 9823.ENSSSCP00000071547	0	0	0.5	0	0		0	0.732	0.487
9823.ENSSSCP00000002645 (pp) 9823.ENSSSCP00000049633	0.147	0	0.5	0.066	0		0	0.76	0.469
9823.ENSSSCP00000002645 (pp) 9823.ENSSSCP00000015138	0.107	0	0.4	0.141	0		0	0.806	0.629
9823.ENSSSCP00000035407 (pp) 9823.ENSSSCP00000049633	0.218	0	0	0	0		0	0.43	0.301
9823.ENSSSCP00000049633 (pp) 9823.ENSSSCP00000071547	0.118	0	0.5	0	0		0	0.677	0.327
9823.ENSSSCP00000015138 (pp) 9823.ENSSSCP00000035407	0.065	0	0	0.122	0		0	0.413	0.342
9823.ENSSSCP00000015138 (pp) 9823.ENSSSCP00000071547	0.151	0	0.4	0	0		0	0.581	0.243
9823.ENSSSCP00000047675 (pp) 9823.ENSSSCP00000048132	0.276	0	0	0	0		0	0.442	0.261
9823.ENSSSCP00000047675 (pp) 9823.ENSSSCP00000069216	0.285	0	0	0	0		0	0.448	0.259
9823.ENSSSCP00000047675 (pp) 9823.ENSSSCP00000049868	0.239	0	0	0	0		0	0.451	0.308
9823.ENSSSCP00000047675 (pp) 9823.ENSSSCP00000055099	0.723	0	0	0	0		0	0.757	0.158
9823.ENSSSCP00000051036 (pp) 9823.ENSSSCP00000069216	0.64	0	0	0	0		0	0.712	0.233
9823.ENSSSCP00000051036 (pp) 9823.ENSSSCP00000055099	0.734	0	0	0.097	0		0	0.837	0.378
9823.ENSSSCP00000051036 (pp) 9823.ENSSSCP00000074469	0.891	0	0	0	0		0	0.903	0.155
9823.ENSSSCP00000051036 (pp) 9823.ENSSSCP00000074245	0.933	0	0	0.083	0		0	0.966	0.499
9823.ENSSSCP00000008142 (pp) 9823.ENSSSCP00000069216	0.379	0	0	0.1	0		0	0.549	0.259
9823.ENSSSCP00000008142 (pp) 9823.ENSSSCP00000045169	0.518	0	0	0	0		0	0.627	0.259
9823.ENSSSCP00000008142 (pp) 9823.ENSSSCP00000055099	0.394	0	0	0.1	0		0	0.638	0.391
9823.ENSSSCP00000008142 (pp) 9823.ENSSSCP00000048132	0.595	0	0	0	0		0	0.771	0.459
9823.ENSSSCP00000008142 (pp) 9823.ENSSSCP00000074245	0.618	0	0	0.092	0		0	0.798	0.466
9823.ENSSSCP00000008142 (pp) 9823.ENSSSCP00000030827	0.646	0	0	0.071	0		0	0.812	0.475
9823.ENSSSCP00000008142 (pp) 9823.ENSSSCP00000074469	0.654	0	0	0.091	0		0	0.816	0.462
9823.ENSSSCP00000008142 (pp) 9823.ENSSSCP00000023669	0.061	0	0	0.83	0		0	0.833	0
9823.ENSSSCP00000008142 (pp) 9823.ENSSSCP00000049868	0.638	0	0.54	0.954	0		0	0.995	0.495
9823.ENSSSCP00000008142 (pp) 9823.ENSSSCP00000051036	0.69	0	0.72	0.972	0		0	0.998	0.515
9823.ENSSSCP00000055099 (pp) 9823.ENSSSCP00000074469	0.802	0	0.754	0.929	0		0	0.998	0.511
9823.ENSSSCP00000055099 (pp) 9823.ENSSSCP00000074245	0.779	0	0.754	0.935	0		0	0.998	0.648
9823.ENSSSCP00000055099 (pp) 9823.ENSSSCP00000069216	0.798	0	0.845	0.942	0		0	0.998	0.487
9823.ENSSSCP00000045169 (pp) 9823.ENSSSCP00000047675	0.185	0	0	0	0		0	0.417	0.313
9823.ENSSSCP00000045169 (pp) 9823.ENSSSCP00000051036	0.659	0	0	0	0		0	0.746	0.287
9823.ENSSSCP00000045169 (pp) 9823.ENSSSCP00000049868	0.908	0	0	0.085	0		0	0.949	0.451
9823.ENSSSCP00000045169 (pp) 9823.ENSSSCP00000048132	0.924	0	0	0.835	0		0	0.988	0.129
9823.ENSSSCP00000045169 (pp) 9823.ENSSSCP00000074469	0.804	0	0.754	0.894	0		0	0.996	0.454
9823.ENSSSCP00000045169 (pp) 9823.ENSSSCP00000069216	0.958	0	0.845	0.933	0		0	0.999	0.561
9823.ENSSSCP00000045169 (pp) 9823.ENSSSCP00000074245	0.834	0	0.754	0.967	0		0	0.999	0.503
9823.ENSSSCP00000045169 (pp) 9823.ENSSSCP00000055099	0.952	0	0.845	0.992	0		0	0.999	0.789
9823.ENSSSCP00000003537 (pp) 9823.ENSSSCP00000009445	0	0	0	0	0		0	0.4	0.401
9823.ENSSSCP00000003537 (pp) 9823.ENSSSCP00000016311	0.537	0	0	0	0		0	0.703	0.386
9823.ENSSSCP00000003537 (pp) 9823.ENSSSCP00000008142	0.637	0	0	0.092	0		0	0.763	0.341
9823.ENSSSCP00000003537 (pp) 9823.ENSSSCP00000048132	0.398	0	0	0.821	0		0	0.898	0.132
9823.ENSSSCP00000003537 (pp) 9823.ENSSSCP00000074469	0.238	0	0.677	0.857	0		0	0.971	0.284
9823.ENSSSCP00000003537 (pp) 9823.ENSSSCP00000045169	0.249	0	0.754	0.894	0		0	0.983	0.26
9823.ENSSSCP00000003537 (pp) 9823.ENSSSCP00000055099	0.187	0	0.754	0.909	0		0	0.985	0.29
9823.ENSSSCP00000003537 (pp) 9823.ENSSSCP00000074245	0.261	0	0.859	0.875	0		0	0.99	0.36
9823.ENSSSCP00000003537 (pp) 9823.ENSSSCP00000030827	0.383	0	0.893	0.882	0		0	0.994	0.356
9823.ENSSSCP00000003537 (pp) 9823.ENSSSCP00000069216	0.245	0	0.893	0.908	0		0	0.995	0.469
9823.ENSSSCP00000074245 (pp) 9823.ENSSSCP00000074469	0.554	0	0.677	0.874	0		0	0.988	0.457
9823.ENSSSCP00000030827 (pp) 9823.ENSSSCP00000035237	0.219	0	0	0	0		0	0.463	0.341
9823.ENSSSCP00000030827 (pp) 9823.ENSSSCP00000047675	0.239	0	0	0	0		0	0.501	0.372
9823.ENSSSCP00000030827 (pp) 9823.ENSSSCP00000051036	0.66	0	0	0	0		0	0.775	0.367
9823.ENSSSCP00000030827 (pp) 9823.ENSSSCP00000049868	0.896	0	0	0.049	0		0	0.926	0.313
9823.ENSSSCP00000030827 (pp) 9823.ENSSSCP00000048132	0.576	0	0	0.836	0		0	0.946	0.287
9823.ENSSSCP00000030827 (pp) 9823.ENSSSCP00000074469	0.81	0	0.754	0.953	0		0	0.998	0.516
9823.ENSSSCP00000030827 (pp) 9823.ENSSSCP00000074245	0.657	0	0.893	0.935	0		0	0.998	0.569
9823.ENSSSCP00000030827 (pp) 9823.ENSSSCP00000069216	0.893	0	0.932	0.935	0		0	0.999	0.537
9823.ENSSSCP00000030827 (pp) 9823.ENSSSCP00000055099	0.908	0	0.845	0.989	0		0	0.999	0.648
9823.ENSSSCP00000030827 (pp) 9823.ENSSSCP00000045169	0.895	0	0.845	0.989	0		0	0.999	0.629
9823.ENSSSCP00000069216 (pp) 9823.ENSSSCP00000074469	0.808	0	0.754	0.918	0		0	0.997	0.422
9823.ENSSSCP00000069216 (pp) 9823.ENSSSCP00000074245	0.564	0	0.893	0.895	0		0	0.997	0.509
9823.ENSSSCP00000003080 (pp) 9823.ENSSSCP00000035267	0.228	0	0	0	0		0	0.439	0.304
9823.ENSSSCP00000003080 (pp) 9823.ENSSSCP00000041998	0.522	0	0	0	0		0	0.522	0
9823.ENSSSCP00000003080 (pp) 9823.ENSSSCP00000050735	0.55	0	0	0	0		0	0.55	0
9823.ENSSSCP00000003080 (pp) 9823.ENSSSCP00000041630	0.55	0	0	0	0		0	0.55	0
9823.ENSSSCP00000003080 (pp) 9823.ENSSSCP00000032171	0.601	0	0	0	0		0	0.601	0
9823.ENSSSCP00000003080 (pp) 9823.ENSSSCP00000039109	0.641	0	0	0	0		0	0.659	0.088
9823.ENSSSCP00000003080 (pp) 9823.ENSSSCP00000036235	0.642	0	0	0	0		0.116	0.67	0
9823.ENSSSCP00000003080 (pp) 9823.ENSSSCP00000009753	0.816	0	0	0	0		0	0.816	0
9823.ENSSSCP00000035267 (pp) 9823.ENSSSCP00000043782	0.145	0	0	0.301	0		0	0.423	0.113
9823.ENSSSCP00000035267 (pp) 9823.ENSSSCP00000073054	0.535	0	0	0.102	0		0.057	0.571	0
9823.ENSSSCP00000035267 (pp) 9823.ENSSSCP00000041630	0.527	0	0	0.7	0		0	0.858	0.085
9823.ENSSSCP00000035267 (pp) 9823.ENSSSCP00000036235	0.54	0	0	0.7	0		0	0.868	0.121
9823.ENSSSCP00000035267 (pp) 9823.ENSSSCP00000049299	0.533	0	0	0.83	0		0	0.924	0.128
9823.ENSSSCP00000035267 (pp) 9823.ENSSSCP00000050735	0.405	0	0	0.892	0		0.057	0.941	0.149
9823.ENSSSCP00000035267 (pp) 9823.ENSSSCP00000061617	0.362	0	0.5	0.891	0		0	0.969	0.227
9823.ENSSSCP00000035267 (pp) 9823.ENSSSCP00000039109	0.522	0	0.5	0.904	0		0.062	0.979	0.182
9823.ENSSSCP00000035267 (pp) 9823.ENSSSCP00000060117	0.391	0	0.5	0.934	0		0	0.98	0.133
9823.ENSSSCP00000035267 (pp) 9823.ENSSSCP00000041998	0.385	0	0	0.971	0		0.057	0.983	0.146
9823.ENSSSCP00000035267 (pp) 9823.ENSSSCP00000046039	0.634	0	0	0.981	0		0.062	0.993	0.163
9823.ENSSSCP00000017034 (pp) 9823.ENSSSCP00000045169	0.313	0	0	0	0		0	0.401	0.163
9823.ENSSSCP00000017034 (pp) 9823.ENSSSCP00000055099	0.294	0	0	0	0		0	0.412	0.201
9823.ENSSSCP00000017034 (pp) 9823.ENSSSCP00000074245	0.46	0	0	0	0		0	0.459	0
9823.ENSSSCP00000017034 (pp) 9823.ENSSSCP00000051036	0.53	0	0	0	0		0	0.532	0.047
9823.ENSSSCP00000017034 (pp) 9823.ENSSSCP00000047675	0.559	0	0	0	0		0	0.559	0
9823.ENSSSCP00000041998 (pp) 9823.ENSSSCP00000043782	0.096	0	0	0.412	0		0	0.46	0.067
9823.ENSSSCP00000041998 (pp) 9823.ENSSSCP00000073054	0.463	0	0	0.073	0		0	0.48	0
9823.ENSSSCP00000041998 (pp) 9823.ENSSSCP00000044686	0.084	0	0.5	0.553	0		0	0.785	0.074
9823.ENSSSCP00000041998 (pp) 9823.ENSSSCP00000050735	0.474	0	0	0.832	0		0.059	0.919	0.147
9823.ENSSSCP00000041998 (pp) 9823.ENSSSCP00000061617	0.439	0	0	0.857	0		0	0.928	0.183
9823.ENSSSCP00000041998 (pp) 9823.ENSSSCP00000049299	0.555	0	0.8	0.7	0		0	0.972	0.091
9823.ENSSSCP00000041998 (pp) 9823.ENSSSCP00000060117	0.686	0	0	0.971	0		0	0.991	0.129
9823.ENSSSCP00000041998 (pp) 9823.ENSSSCP00000046039	0.646	0	0.8	0.971	0		0.065	0.998	0.257
9823.ENSSSCP00000050735 (pp) 9823.ENSSSCP00000073054	0.537	0	0	0.108	0		0	0.609	0.131
9823.ENSSSCP00000050735 (pp) 9823.ENSSSCP00000061617	0.398	0	0	0.889	0		0	0.938	0.152
9823.ENSSSCP00000050735 (pp) 9823.ENSSSCP00000060117	0.543	0	0	0.93	0		0	0.97	0.154
9823.ENSSSCP00000032171 (pp) 9823.ENSSSCP00000042178	0.28	0	0	0.303	0		0	0.49	0.067
9823.ENSSSCP00000032171 (pp) 9823.ENSSSCP00000043782	0.122	0	0	0.45	0		0	0.496	0
9823.ENSSSCP00000032171 (pp) 9823.ENSSSCP00000073054	0.544	0	0	0.13	0		0	0.624	0.129
9823.ENSSSCP00000032171 (pp) 9823.ENSSSCP00000041630	0.558	0	0	0.553	0		0	0.824	0.183
9823.ENSSSCP00000032171 (pp) 9823.ENSSSCP00000036235	0.558	0	0	0.553	0		0	0.869	0.394
9823.ENSSSCP00000032171 (pp) 9823.ENSSSCP00000049299	0.636	0	0	0.66	0		0	0.886	0.155
9823.ENSSSCP00000032171 (pp) 9823.ENSSSCP00000041998	0.528	0	0	0.832	0		0.065	0.948	0.388
9823.ENSSSCP00000032171 (pp) 9823.ENSSSCP00000050735	0.522	0	0	0.892	0		0.065	0.955	0.181
9823.ENSSSCP00000032171 (pp) 9823.ENSSSCP00000039109	0.558	0	0	0.905	0		0.097	0.966	0.218
9823.ENSSSCP00000032171 (pp) 9823.ENSSSCP00000035267	0.505	0	0.5	0.894	0		0.062	0.975	0.163
9823.ENSSSCP00000032171 (pp) 9823.ENSSSCP00000061617	0.522	0	0.5	0.891	0		0	0.976	0.183
9823.ENSSSCP00000032171 (pp) 9823.ENSSSCP00000060117	0.651	0	0	0.935	0		0	0.984	0.378
9823.ENSSSCP00000032171 (pp) 9823.ENSSSCP00000046039	0.785	0	0	0.965	0		0.097	0.993	0.218
9823.ENSSSCP00000039109 (pp) 9823.ENSSSCP00000042178	0.232	0	0	0.303	0		0	0.441	0.041
9823.ENSSSCP00000039109 (pp) 9823.ENSSSCP00000043782	0.166	0	0	0.428	0		0	0.502	0
9823.ENSSSCP00000039109 (pp) 9823.ENSSSCP00000073054	0.549	0	0	0.099	0		0	0.576	0
9823.ENSSSCP00000039109 (pp) 9823.ENSSSCP00000041630	0.586	0	0	0.553	0		0	0.828	0.145
9823.ENSSSCP00000039109 (pp) 9823.ENSSSCP00000049299	0.636	0	0	0.66	0		0	0.882	0.128
9823.ENSSSCP00000039109 (pp) 9823.ENSSSCP00000041998	0.536	0	0	0.832	0		0.065	0.932	0.181
9823.ENSSSCP00000039109 (pp) 9823.ENSSSCP00000050735	0.522	0	0	0.9	0		0.065	0.958	0.181
9823.ENSSSCP00000039109 (pp) 9823.ENSSSCP00000061617	0.522	0	0.5	0.896	0		0	0.975	0.132
9823.ENSSSCP00000039109 (pp) 9823.ENSSSCP00000060117	0.79	0	0	0.935	0		0	0.988	0.182
9823.ENSSSCP00000039109 (pp) 9823.ENSSSCP00000046039	0.947	0	0	0.965	0		0.097	0.998	0.218
9823.ENSSSCP00000036235 (pp) 9823.ENSSSCP00000040435	0.078	0	0	0.3	0		0	0.444	0.208
9823.ENSSSCP00000036235 (pp) 9823.ENSSSCP00000042178	0.232	0	0	0.303	0		0	0.468	0.086
9823.ENSSSCP00000036235 (pp) 9823.ENSSSCP00000073054	0.549	0	0	0.076	0		0	0.565	0
9823.ENSSSCP00000036235 (pp) 9823.ENSSSCP00000043782	0.21	0	0	0.485	0		0	0.575	0
9823.ENSSSCP00000036235 (pp) 9823.ENSSSCP00000044686	0.15	0	0	0.553	0		0	0.633	0.114
9823.ENSSSCP00000036235 (pp) 9823.ENSSSCP00000061617	0.518	0	0	0.514	0		0	0.791	0.183
9823.ENSSSCP00000036235 (pp) 9823.ENSSSCP00000050735	0.522	0	0	0.553	0		0	0.809	0.18
9823.ENSSSCP00000036235 (pp) 9823.ENSSSCP00000039109	0.571	0	0	0.553	0		0	0.829	0.182
9823.ENSSSCP00000036235 (pp) 9823.ENSSSCP00000041630	0.578	0	0	0.597	0		0	0.922	0.579
9823.ENSSSCP00000036235 (pp) 9823.ENSSSCP00000041998	0.53	0	0.54	0.597	0		0	0.934	0.337
9823.ENSSSCP00000036235 (pp) 9823.ENSSSCP00000060117	0.636	0	0	0.7	0		0	0.942	0.513
9823.ENSSSCP00000036235 (pp) 9823.ENSSSCP00000049299	0.635	0	0.54	0.7	0		0	0.953	0.181
9823.ENSSSCP00000036235 (pp) 9823.ENSSSCP00000046039	0.784	0	0.54	0.7	0		0	0.981	0.461
9823.ENSSSCP00000009753 (pp) 9823.ENSSSCP00000042178	0.359	0	0	0.421	0		0	0.625	0.072
9823.ENSSSCP00000009753 (pp) 9823.ENSSSCP00000043782	0.281	0	0	0.535	0		0	0.672	0.1
9823.ENSSSCP00000009753 (pp) 9823.ENSSSCP00000073054	0.685	0	0	0.101	0		0	0.704	0
9823.ENSSSCP00000009753 (pp) 9823.ENSSSCP00000041998	0.658	0	0	0.7	0		0.102	0.92	0.238
9823.ENSSSCP00000009753 (pp) 9823.ENSSSCP00000036235	0.795	0	0	0.7	0		0	0.946	0.201
9823.ENSSSCP00000009753 (pp) 9823.ENSSSCP00000020253	0.532	0	0	0.906	0		0	0.957	0.101
9823.ENSSSCP00000009753 (pp) 9823.ENSSSCP00000041630	0.797	0	0	0.7	0		0	0.967	0.501
9823.ENSSSCP00000009753 (pp) 9823.ENSSSCP00000029600	0.853	0	0	0.812	0		0	0.971	0
9823.ENSSSCP00000009753 (pp) 9823.ENSSSCP00000049299	0.816	0	0	0.83	0		0	0.972	0.18
9823.ENSSSCP00000009753 (pp) 9823.ENSSSCP00000050735	0.64	0	0	0.922	0		0.102	0.977	0.219
9823.ENSSSCP00000009753 (pp) 9823.ENSSSCP00000061617	0.639	0	0.5	0.915	0		0	0.986	0.209
9823.ENSSSCP00000009753 (pp) 9823.ENSSSCP00000035267	0.634	0	0.5	0.915	0		0	0.988	0.341
9823.ENSSSCP00000009753 (pp) 9823.ENSSSCP00000039109	0.794	0	0	0.935	0		0.116	0.989	0.213
9823.ENSSSCP00000009753 (pp) 9823.ENSSSCP00000032171	0.786	0	0	0.935	0		0.116	0.99	0.294
9823.ENSSSCP00000009753 (pp) 9823.ENSSSCP00000046039	0.909	0	0	0.953	0		0.116	0.996	0.294
9823.ENSSSCP00000009753 (pp) 9823.ENSSSCP00000060117	0.909	0	0	0.989	0		0.045	0.999	0.259
9823.ENSSSCP00000016311 (pp) 9823.ENSSSCP00000048132	0.63	0	0	0	0		0	0.789	0.453
9823.ENSSSCP00000005385 (pp) 9823.ENSSSCP00000042178	0.204	0	0	0.285	0		0	0.425	0.072
9823.ENSSSCP00000005385 (pp) 9823.ENSSSCP00000073054	0.407	0	0	0.078	0		0	0.429	0
9823.ENSSSCP00000005385 (pp) 9823.ENSSSCP00000029600	0.52	0	0	0.084	0		0	0.542	0
9823.ENSSSCP00000005385 (pp) 9823.ENSSSCP00000050735	0.398	0	0	0.469	0		0	0.705	0.152
9823.ENSSSCP00000005385 (pp) 9823.ENSSSCP00000041630	0.542	0	0	0.514	0		0	0.798	0.165
9823.ENSSSCP00000005385 (pp) 9823.ENSSSCP00000020253	0.526	0	0	0.597	0		0	0.803	0.053
9823.ENSSSCP00000005385 (pp) 9823.ENSSSCP00000036235	0.546	0	0	0.514	0		0	0.804	0.183
9823.ENSSSCP00000005385 (pp) 9823.ENSSSCP00000035267	0.362	0	0.5	0.481	0		0	0.854	0.227
9823.ENSSSCP00000005385 (pp) 9823.ENSSSCP00000049299	0.55	0	0	0.597	0		0	0.854	0.26
9823.ENSSSCP00000005385 (pp) 9823.ENSSSCP00000032171	0.522	0	0.5	0.482	0		0	0.885	0.183
9823.ENSSSCP00000005385 (pp) 9823.ENSSSCP00000061617	0	0.058	0.9	0	0		0	0.901	0
9823.ENSSSCP00000005385 (pp) 9823.ENSSSCP00000041998	0.439	0	0	0.857	0		0	0.928	0.183
9823.ENSSSCP00000005385 (pp) 9823.ENSSSCP00000039109	0.736	0	0.5	0.505	0		0	0.935	0.132
9823.ENSSSCP00000005385 (pp) 9823.ENSSSCP00000009753	0.666	0	0.5	0.595	0		0	0.939	0.209
9823.ENSSSCP00000005385 (pp) 9823.ENSSSCP00000060117	0.558	0	0.5	0.64	0		0	0.945	0.394
9823.ENSSSCP00000005385 (pp) 9823.ENSSSCP00000046039	0.777	0	0	0.966	0		0	0.993	0.227
9823.ENSSSCP00000042178 (pp) 9823.ENSSSCP00000061617	0.204	0	0	0.285	0		0	0.425	0.072
9823.ENSSSCP00000042178 (pp) 9823.ENSSSCP00000046039	0.222	0	0	0.303	0		0	0.467	0.097
9823.ENSSSCP00000042178 (pp) 9823.ENSSSCP00000049299	0.082	0.056	0.5	0.689	0		0	0.847	0
9823.ENSSSCP00000029600 (pp) 9823.ENSSSCP00000041998	0.463	0	0	0.073	0		0	0.48	0
9823.ENSSSCP00000029600 (pp) 9823.ENSSSCP00000046039	0.519	0	0	0	0		0	0.519	0
9823.ENSSSCP00000029600 (pp) 9823.ENSSSCP00000036235	0.58	0	0	0.076	0		0	0.595	0
9823.ENSSSCP00000029600 (pp) 9823.ENSSSCP00000041630	0.661	0	0	0.06	0		0	0.67	0.049
9823.ENSSSCP00000029600 (pp) 9823.ENSSSCP00000049299	0.751	0	0	0.058	0		0	0.763	0.073
9823.ENSSSCP00000029600 (pp) 9823.ENSSSCP00000060117	0.355	0	0	0.812	0		0	0.874	0
9823.ENSSSCP00000029600 (pp) 9823.ENSSSCP00000061617	0.488	0	0	0.808	0		0	0.898	0
9823.ENSSSCP00000029600 (pp) 9823.ENSSSCP00000035267	0.539	0	0	0.812	0		0.057	0.911	0
9823.ENSSSCP00000029600 (pp) 9823.ENSSSCP00000050735	0.568	0	0	0.813	0		0	0.924	0.131
9823.ENSSSCP00000029600 (pp) 9823.ENSSSCP00000039109	0.654	0	0	0.812	0		0	0.932	0
9823.ENSSSCP00000029600 (pp) 9823.ENSSSCP00000032171	0.653	0	0	0.818	0		0	0.94	0.129
9823.ENSSSCP00000020253 (pp) 9823.ENSSSCP00000029600	0.656	0	0	0	0		0	0.656	0
9823.ENSSSCP00000020253 (pp) 9823.ENSSSCP00000061617	0.247	0	0	0.597	0		0	0.687	0.053
9823.ENSSSCP00000020253 (pp) 9823.ENSSSCP00000050735	0.23	0	0	0.66	0		0	0.727	0.041
9823.ENSSSCP00000020253 (pp) 9823.ENSSSCP00000044686	0.11	0	0.5	0.535	0		0	0.778	0.056
9823.ENSSSCP00000020253 (pp) 9823.ENSSSCP00000032171	0.562	0	0	0.688	0		0	0.891	0.27
9823.ENSSSCP00000020253 (pp) 9823.ENSSSCP00000035267	0.346	0	0	0.83	0		0	0.907	0.232
9823.ENSSSCP00000020253 (pp) 9823.ENSSSCP00000060117	0.286	0	0	0.9	0		0	0.926	0.057
9823.ENSSSCP00000020253 (pp) 9823.ENSSSCP00000036235	0.588	0	0.54	0.7	0		0	0.946	0.162
9823.ENSSSCP00000020253 (pp) 9823.ENSSSCP00000039109	0.841	0	0	0.688	0		0	0.949	0.066
9823.ENSSSCP00000020253 (pp) 9823.ENSSSCP00000041630	0.44	0	0.8	0.7	0		0	0.968	0.182
9823.ENSSSCP00000020253 (pp) 9823.ENSSSCP00000041998	0.245	0	0.8	0.7	0		0	0.972	0.472
9823.ENSSSCP00000020253 (pp) 9823.ENSSSCP00000049299	0.553	0	0.8	0.83	0		0	0.983	0
9823.ENSSSCP00000020253 (pp) 9823.ENSSSCP00000046039	0.845	0	0.9	0.948	0		0	0.999	0.43
9823.ENSSSCP00000061617 (pp) 9823.ENSSSCP00000073054	0.407	0	0	0.078	0		0	0.429	0
9823.ENSSSCP00000060117 (pp) 9823.ENSSSCP00000061617	0.558	0	0.5	0.924	0		0	0.988	0.394
9823.ENSSSCP00000046039 (pp) 9823.ENSSSCP00000066653	0.107	0	0	0.393	0		0	0.438	0.048
9823.ENSSSCP00000046039 (pp) 9823.ENSSSCP00000050735	0.639	0	0	0.965	0		0.065	0.989	0.181
9823.ENSSSCP00000046039 (pp) 9823.ENSSSCP00000061617	0.635	0	0.36	0.966	0		0	0.993	0.227
9823.ENSSSCP00000046039 (pp) 9823.ENSSSCP00000049299	0.807	0	0.8	0.83	0		0	0.994	0.209
9823.ENSSSCP00000046039 (pp) 9823.ENSSSCP00000060117	0.909	0	0	0.981	0		0	0.999	0.471
9823.ENSSSCP00000005883 (pp) 9823.ENSSSCP00000012108	0.058	0	0.4	0	0		0	0.469	0.136
9823.ENSSSCP00000005883 (pp) 9823.ENSSSCP00000066291	0	0.122	0.4	0	0		0	0.483	0.098
9823.ENSSSCP00000005883 (pp) 9823.ENSSSCP00000056442	0	0	0.4	0	0		0	0.523	0.237
9823.ENSSSCP00000005883 (pp) 9823.ENSSSCP00000066198	0.08	0.156	0.4	0.066	0		0	0.553	0.131
9823.ENSSSCP00000005883 (pp) 9823.ENSSSCP00000006349	0.063	0.162	0.4	0.083	0		0	0.653	0.32
9823.ENSSSCP00000012108 (pp) 9823.ENSSSCP00000030309	0	0	0.5	0	0		0	0.499	0
9823.ENSSSCP00000012108 (pp) 9823.ENSSSCP00000066291	0.107	0	0.4	0.078	0		0	0.538	0.175
9823.ENSSSCP00000012108 (pp) 9823.ENSSSCP00000066198	0.1	0	0.4	0.073	0		0	0.615	0.322
9823.ENSSSCP00000012108 (pp) 9823.ENSSSCP00000056442	0	0	0.4	0.078	0		0	0.473	0.125
9823.ENSSSCP00000012108 (pp) 9823.ENSSSCP00000035562	0	0	0.5	0	0		0	0.499	0
9823.ENSSSCP00000056442 (pp) 9823.ENSSSCP00000066291	0	0	0.4	0	0		0	0.551	0.282
9823.ENSSSCP00000056442 (pp) 9823.ENSSSCP00000066198	0.136	0	0.4	0.067	0		0	0.665	0.389
9823.ENSSSCP00000066198 (pp) 9823.ENSSSCP00000066291	0.894	0.198	0.4	0.067	0		0	0.968	0.436
9823.ENSSSCP00000006349 (pp) 9823.ENSSSCP00000066198	0	0	0.4	0.083	0		0	0.484	0.137
9823.ENSSSCP00000006349 (pp) 9823.ENSSSCP00000066291	0	0.09	0.4	0.083	0		0	0.508	0.133
9823.ENSSSCP00000006349 (pp) 9823.ENSSSCP00000056442	0	0	0.4	0.083	0		0	0.513	0.187
9823.ENSSSCP00000006349 (pp) 9823.ENSSSCP00000012108	0	0	0.4	0.083	0		0	0.514	0.187
9823.ENSSSCP00000044686 (pp) 9823.ENSSSCP00000066653	0.141	0	0	0.31	0		0	0.589	0.363
9823.ENSSSCP00000044686 (pp) 9823.ENSSSCP00000049299	0.122	0	0.5	0.596	0		0	0.807	0
9823.ENSSSCP00000044686 (pp) 9823.ENSSSCP00000046039	0.091	0	0.5	0.691	0		0	0.85	0.063
9823.ENSSSCP00000006426 (pp) 9823.ENSSSCP00000029600	0.379	0	0	0	0		0	0.408	0.086
9823.ENSSSCP00000006426 (pp) 9823.ENSSSCP00000043782	0.119	0	0	0.356	0		0	0.453	0.114
9823.ENSSSCP00000006426 (pp) 9823.ENSSSCP00000066653	0.097	0	0	0.407	0		0	0.57	0.261
9823.ENSSSCP00000006426 (pp) 9823.ENSSSCP00000040435	0.174	0	0	0.386	0		0	0.655	0.374
9823.ENSSSCP00000006426 (pp) 9823.ENSSSCP00000036235	0.204	0	0	0.553	0		0	0.683	0.183
9823.ENSSSCP00000006426 (pp) 9823.ENSSSCP00000020253	0.154	0	0.5	0.535	0		0	0.791	0.063
9823.ENSSSCP00000006426 (pp) 9823.ENSSSCP00000041998	0.223	0	0.5	0.553	0		0	0.811	0
9823.ENSSSCP00000006426 (pp) 9823.ENSSSCP00000049299	0.146	0	0.5	0.596	0		0	0.812	0.041
9823.ENSSSCP00000006426 (pp) 9823.ENSSSCP00000041630	0.273	0	0.5	0.553	0		0	0.827	0.066
9823.ENSSSCP00000006426 (pp) 9823.ENSSSCP00000046039	0.24	0	0.54	0.691	0		0	0.882	0
9823.ENSSSCP00000006426 (pp) 9823.ENSSSCP00000044686	0.364	0	0.8	0.953	0		0	0.999	0.911
9823.ENSSSCP00000043782 (pp) 9823.ENSSSCP00000050735	0.174	0	0	0.313	0		0	0.408	0
9823.ENSSSCP00000043782 (pp) 9823.ENSSSCP00000049299	0.054	0	0	0.451	0		0	0.458	0
9823.ENSSSCP00000043782 (pp) 9823.ENSSSCP00000046039	0.077	0	0	0.535	0		0	0.552	0
9823.ENSSSCP00000043782 (pp) 9823.ENSSSCP00000060117	0.083	0	0	0.535	0		0	0.565	0.063
9823.ENSSSCP00000043782 (pp) 9823.ENSSSCP00000044686	0.107	0	0	0.495	0		0	0.588	0.161
9823.ENSSSCP00000040435 (pp) 9823.ENSSSCP00000044686	0.092	0	0	0.343	0		0	0.544	0.298
9823.ENSSSCP00000040435 (pp) 9823.ENSSSCP00000049299	0.051	0	0.5	0.217	0		0	0.628	0.118
9823.ENSSSCP00000040435 (pp) 9823.ENSSSCP00000042178	0.147	0	0.5	0.813	0		0	0.952	0.473
9823.ENSSSCP00000023669 (pp) 9823.ENSSSCP00000051036	0.063	0	0	0.7	0		0	0.786	0.302
9823.ENSSSCP00000023669 (pp) 9823.ENSSSCP00000049868	0.217	0	0	0.66	0		0	0.803	0.321
9823.ENSSSCP00000049868 (pp) 9823.ENSSSCP00000067853	0.105	0	0	0.048	0		0	0.588	0.556
9823.ENSSSCP00000049868 (pp) 9823.ENSSSCP00000074469	0.567	0	0	0.079	0		0	0.594	0.066
9823.ENSSSCP00000049868 (pp) 9823.ENSSSCP00000074245	0.513	0	0	0.084	0		0	0.687	0.356
9823.ENSSSCP00000049868 (pp) 9823.ENSSSCP00000055099	0.56	0	0	0.087	0		0	0.692	0.297
9823.ENSSSCP00000049868 (pp) 9823.ENSSSCP00000069216	0.637	0	0	0.083	0		0	0.697	0.163
9823.ENSSSCP00000049868 (pp) 9823.ENSSSCP00000051036	0.602	0	0.8	0.962	0		0	0.998	0.483
9823.ENSSSCP00000008621 (pp) 9823.ENSSSCP00000056442	0.065	0	0	0.081	0		0	0.426	0.386
9823.ENSSSCP00000008621 (pp) 9823.ENSSSCP00000066291	0.121	0	0	0.081	0		0	0.483	0.412
9823.ENSSSCP00000008621 (pp) 9823.ENSSSCP00000066198	0.148	0	0	0.081	0		0	0.545	0.465
9823.ENSSSCP00000010358 (pp) 9823.ENSSSCP00000021647	0.053	0	0.237	0.162	0		0.042	0.477	0.238
9823.ENSSSCP00000021647 (pp) 9823.ENSSSCP00000043674	0	0	0	0	0.421		0	0.462	0.109
9823.ENSSSCP00000021647 (pp) 9823.ENSSSCP00000049669	0.116	0	0.165	0.047	0		0.042	0.655	0.567
9823.ENSSSCP00000021647 (pp) 9823.ENSSSCP00000036513	0.048	0	0	0	0		0	0.79	0.788
9823.ENSSSCP00000030309 (pp) 9823.ENSSSCP00000035562	0	0	0.5	0	0		0	0.499	0
9823.ENSSSCP00000014993 (pp) 9823.ENSSSCP00000029596	0.205	0	0	0.327	0		0	0.442	0
9823.ENSSSCP00000029596 (pp) 9823.ENSSSCP00000074245	0.638	0	0	0	0		0	0.638	0
9823.ENSSSCP00000016264 (pp) 9823.ENSSSCP00000049299	0.101	0	0	0.451	0		0	0.493	0.056
9823.ENSSSCP00000016264 (pp) 9823.ENSSSCP00000040435	0.092	0	0	0.48	0		0	0.579	0.181
9823.ENSSSCP00000016264 (pp) 9823.ENSSSCP00000042178	0.533	0	0	0.183	0		0	0.608	0.056
9823.ENSSSCP00000017744 (pp) 9823.ENSSSCP00000056442	0.079	0	0	0	0		0	0.437	0.414
9823.ENSSSCP00000018615 (pp) 9823.ENSSSCP00000074245	0	0	0	0.393	0		0	0.494	0.201
9823.ENSSSCP00000018615 (pp) 9823.ENSSSCP00000045169	0	0	0	0.535	0		0	0.602	0.18
9823.ENSSSCP00000018615 (pp) 9823.ENSSSCP00000055099	0	0	0	0.535	0		0	0.673	0.326
9823.ENSSSCP00000022299 (pp) 9823.ENSSSCP00000045169	0.178	0	0	0	0		0	0.448	0.356
9823.ENSSSCP00000022299 (pp) 9823.ENSSSCP00000074245	0.519	0	0	0	0		0	0.519	0
9823.ENSSSCP00000022299 (pp) 9823.ENSSSCP00000051036	0.561	0	0	0	0		0	0.674	0.288
9823.ENSSSCP00000022299 (pp) 9823.ENSSSCP00000029596	0.81	0	0	0	0		0	0.81	0
9823.ENSSSCP00000026203 (pp) 9823.ENSSSCP00000073054	0.051	0	0	0	0		0	0.406	0.4
9823.ENSSSCP00000028064 (pp) 9823.ENSSSCP00000071547	0	0	0	0	0		0	0.574	0.574
9823.ENSSSCP00000035237 (pp) 9823.ENSSSCP00000045169	0.295	0	0	0.1	0		0	0.419	0.159
9823.ENSSSCP00000034746 (pp) 9823.ENSSSCP00000049299	0	0	0.5	0	0		0	0.499	0
9823.ENSSSCP00000049322 (pp) 9823.ENSSSCP00000072808	0.057	0	0.5	0.101	0		0	0.55	0.065
9823.ENSSSCP00000045631 (pp) 9823.ENSSSCP00000074245	0	0	0	0	0		0	0.418	0.419
9823.ENSSSCP00000046426 (pp) 9823.ENSSSCP00000049299	0	0	0	0.103	0		0	0.415	0.375
9823.ENSSSCP00000049288 (pp) 9823.ENSSSCP00000066198	0.084	0	0	0	0		0	0.412	0.385
9823.ENSSSCP00000049288 (pp) 9823.ENSSSCP00000066291	0.126	0	0	0	0		0	0.677	0.645
9823.ENSSSCP00000065033 (pp) 9823.ENSSSCP00000066291	0.227	0	0	0	0		0	0.519	0.404

## Sheet: liver_subnetwork1
# background genes	# genes	category	description	FDR value	genes	p-value	term name
75	3	GO Biological Process	Fatty acid biosynthetic process	0.0025	FASN|ELOVL2|SCD	2.45e-07	GO:0006633
10	2	GO Molecular Function	Fatty acid synthase activity	0.0071	FASN|ELOVL2	2.62e-06	GO:0004312
24	2	GO Biological Process	Unsaturated fatty acid biosynthetic process	0.022	ELOVL2|SCD	1.29e-05	GO:0006636

## Sheet: liver_subnetwork3
# background genes	category	chart color	description	FDR value	genes	p-value	term name
16	KEGG Pathways		Arginine biosynthesis	0.00067	GLUD1|ARG1	2.02e-06	ssc00220

[truncated: 3 more sheets: liver_subnetwork4, clusters_liver_node_info, clusters_liver_edge_info]
