# Supplementary material for: Pre-metabolic syndrome transcriptional response of adipose tissue and liver to obesity in the Ossabaw pig model
Source: Research Square preprint supplement (doi:10.21203/rs.3.rs-8039124/v1), 2025-12-06
Supplement: Supplementary file 9 [file f75684d7735c74b4422285a3.xlsx]

## Sheet: Sheet1
PigID	Tissue	% mapped	frag_length_mean	frag_length_sd	Reads quantified (Million)	Reads after rRNA removal (Million)	rRNA ratio
3	SAT	45.4053	190.65	70.4082	45.0096	33.7289	0.250627
11	SAT	49.0228	210.666	79.191	46.4673	39.1771	0.15689
13	SAT	44.7827	216.182	83.7856	40.1638	31.2369	0.222261
13	VAT	40.2821	212.237	77.47	33.0507	26.9189	0.185529
13	HEART	38.9267	227.908	89.1583	34.2597	34.1879	0.0020949
13	LIVER	45.2552	223.205	85.6556	36.7707	36.7573	0.000364703
15	SAT	39.4115	223.512	86.2354	22.8227	20.0549	0.121272
15	VAT	36.9312	224.49	88.6882	27.1792	23.8911	0.120978
20	SAT	39.2791	202.628	67.1845	30.3557	26.5044	0.126875
20	VAT	33.6813	211.208	70.9919	19.7548	19.7489	0.000294942
20	LIVER	47.2876	220.56	77.7046	27.8678	27.8623	0.000196917
25	VAT	35.3013	206.209	70.4323	19.5112	19.4998	0.00058596
25	HEART	37.2741	207.903	68.8824	22.8901	22.8466	0.0019002
27	SAT	46.2963	193.75	65.7674	41.1499	31.0201	0.246168
27	LIVER	47.1299	220.282	77.347	27.1627	27.1533	0.00034482
28	SAT	42.161	202.235	67.2682	23.8333	23.8249	0.000350921
28	VAT	39.4391	205.073	72.5675	21.7681	21.7629	0.000238963
28	LIVER	48.7479	210.75	70.4313	28.193	28.1842	0.000311978
29	SAT	42.8662	207.467	74.5897	35.7407	28.0089	0.216328
29	VAT	33.0984	216.727	78.8002	18.4555	18.4466	0.000483309
29	LIVER	47.2936	205.697	62.994	28.0361	28.0261	0.000355713
29	HEART	36.6191	191.457	58.511	24.0704	24.0122	0.00242019
9	SAT	41.2078	209.257	76.9473	22.3915	22.3847	0.000301682
9	VAT	34.8434	205.373	69.8133	17.7521	17.7445	0.000426301
9	HEART	35.982	208.672	71.2643	24.3865	24.3358	0.00208143
9	LIVER	45.8738	212.409	72.482	27.8442	27.8371	0.000255241
18	VAT	30.2841	216.864	75.2074	17.771	17.763	0.000453303
18	HEART	36.3536	211.992	71.6622	21.5403	21.5114	0.00134157
18	LIVER	47.6149	210.629	75.5283	22.9843	22.9775	0.00029324
2	SAT	34.4666	210.975	74.8843	19.6274	19.6207	0.000342555
2	HEART	35.5916	207.81	74.3151	21.8212	21.7727	0.00222443
2	LIVER	47.2017	210.526	75.1135	29.263	29.2547	0.000283445
3	VAT	31.5774	213.04	73.6919	17.1853	17.1802	0.000295616
3	LIVER	47.2205	223.06	77.0045	22.2243	22.2187	0.00025395
11	VAT	25.0012	218.472	72.9159	11.851	11.8484	0.00021584
11	HEART	36.548	211.898	69.4077	18.1925	17.9468	0.0135061
11	LIVER	47.2425	193.9	71.4083	37.3845	30.1393	0.193801
